# Supplementary material for: pLoc-mPlant: predict subcellular localization of multi-location plant proteins by incorporating the optimal GO information into general PseAAC
Source: Royal Society of Chemistry journal article supplement (doi:10.1039/c7mb00267j), 2017-07-12
Supplement: c7mb00267j2.pdf [file c7mb00267j2.pdf]

|        |   |   |   |   |   |  |   |   |  |   |
|--------|---|---|---|---|---|--|---|---|--|---|
| P17990 |   |   | @ |   |   |  |   |   |  | @ |
| P18123 |   |   |   |   |   |  | @ |   |  |   |
| P18417 |   |   |   |   |   |  |   |   |  | @ |
| P18823 |   |   | @ |   |   |  |   |   |  |   |
| P19171 |   |   |   |   |   |  |   |   |  | @ |
| P19172 |   |   |   |   | @ |  |   |   |  |   |
| P19173 |   |   |   |   |   |  | @ |   |  |   |
| P19587 |   |   | @ |   |   |  |   |   |  |   |
| P19593 |   |   | @ |   |   |  |   |   |  |   |
| P19595 |   |   |   | @ |   |  |   |   |  |   |
| P19825 |   |   |   | @ |   |  |   |   |  | @ |
| P20075 |   | @ |   | @ |   |  |   |   |  |   |
| P20115 |   |   |   |   |   |  | @ |   |  |   |
| P22178 |   |   | @ |   |   |  |   |   |  |   |
| P22738 |   |   |   | @ |   |  |   |   |  |   |
| P22778 |   |   |   |   |   |  | @ |   |  |   |
| P22895 |   |   |   |   |   |  |   |   |  | @ |
| P23137 |   | @ |   |   |   |  |   |   |  |   |
| P23326 |   |   | @ |   |   |  |   |   |  |   |
| P23408 |   |   | @ |   |   |  |   |   |  |   |
| P23472 |   |   |   |   |   |  |   |   |  | @ |
| P24226 |   |   | @ |   |   |  |   |   |  |   |
| P24493 |   |   | @ |   |   |  |   |   |  |   |
| P24613 |   |   | @ |   |   |  |   |   |  |   |
| P24632 |   |   |   | @ |   |  |   |   |  |   |
| P24846 |   |   | @ |   |   |  |   |   |  |   |
| P25076 |   |   |   |   |   |  | @ |   |  |   |
| P25141 |   |   |   | @ |   |  |   |   |  |   |
| P25209 |   |   |   |   |   |  |   | @ |  |   |
| P25306 |   |   | @ |   |   |  |   |   |  |   |
| P25699 |   |   |   |   |   |  |   |   |  | @ |
| P25848 | @ |   |   |   |   |  |   |   |  |   |
| P25851 |   |   | @ |   |   |  |   |   |  |   |
| P25873 |   |   | @ |   |   |  |   |   |  |   |
| P25890 |   |   |   |   |   |  |   | @ |  |   |
| P25892 |   |   |   | @ |   |  |   |   |  |   |
| P25998 |   |   |   | @ |   |  |   |   |  |   |
| P26301 |   |   |   | @ |   |  |   |   |  |   |
| P26302 |   |   | @ |   |   |  |   |   |  |   |
| P26307 |   |   |   | @ |   |  |   | @ |  |   |
| P26356 |   |   |   |   |   |  |   | @ |  |   |
| P26360 |   |   |   |   |   |  | @ |   |  |   |
| P26587 |   |   |   |   |   |  |   |   |  | @ |
| P26792 |   | @ |   |   |   |  |   |   |  |   |
| P26851 |   |   |   |   |   |  | @ |   |  |   |
| P26854 |   |   |   |   |   |  | @ |   |  |   |





|        |   |   |   |   |   |   |  |   |   |   |  |   |
|--------|---|---|---|---|---|---|--|---|---|---|--|---|
| P42804 |   |   | @ |   |   |   |  |   |   |   |  |   |
| P42820 |   |   |   |   |   | @ |  |   |   |   |  |   |
| P43254 |   |   |   | @ |   |   |  |   | @ |   |  |   |
| P43299 |   |   |   |   |   |   |  |   | @ |   |  |   |
| P43643 |   | @ |   |   |   |   |  |   |   |   |  |   |
| P45432 |   |   |   | @ |   |   |  |   | @ |   |  |   |
| P45434 |   |   |   |   | @ |   |  |   |   |   |  |   |
| P45951 |   |   |   |   |   |   |  |   | @ |   |  |   |
| P46011 | @ |   |   | @ |   |   |  |   |   |   |  |   |
| P46032 |   |   |   |   |   |   |  |   |   |   |  | @ |
| P46248 |   |   | @ |   |   |   |  |   |   |   |  |   |
| P46269 |   |   |   |   |   |   |  | @ |   |   |  |   |
| P46302 |   |   |   | @ |   |   |  |   |   |   |  |   |
| P46307 |   |   | @ |   |   |   |  |   |   |   |  |   |
| P46416 |   |   | @ |   |   |   |  |   |   |   |  |   |
| P46422 |   |   |   |   | @ |   |  |   |   |   |  |   |
| P46489 |   |   | @ |   |   |   |  |   |   |   |  |   |
| P46643 |   |   |   |   |   |   |  | @ |   |   |  |   |
| P46666 |   |   | @ |   |   |   |  |   |   |   |  |   |
| P46741 |   |   |   |   |   |   |  | @ |   |   |  |   |
| P46743 |   |   |   |   |   |   |  | @ |   |   |  |   |
| P46746 |   |   |   |   |   |   |  | @ |   |   |  |   |
| P46748 |   |   |   |   |   |   |  | @ |   |   |  |   |
| P46749 |   |   |   |   |   |   |  | @ |   |   |  |   |
| P48269 |   |   | @ |   |   |   |  |   |   |   |  |   |
| P48407 |   |   |   | @ |   |   |  |   |   |   |  |   |
| P48496 |   |   | @ |   |   |   |  |   |   |   |  |   |
| P48502 |   |   |   |   |   |   |  | @ |   |   |  |   |
| P48504 |   |   |   |   |   |   |  | @ |   |   |  |   |
| P48505 |   |   |   |   |   |   |  | @ |   |   |  |   |
| P48513 |   |   |   |   |   |   |  |   | @ |   |  |   |
| P48534 |   |   |   | @ |   |   |  |   |   |   |  |   |
| P48578 |   |   |   | @ |   |   |  |   |   |   |  |   |
| P48630 |   |   |   |   | @ |   |  |   |   |   |  |   |
| P48732 |   |   |   |   |   |   |  |   | @ |   |  |   |
| P49079 |   |   | @ |   |   |   |  |   |   |   |  |   |
| P49175 |   |   |   |   |   |   |  |   |   |   |  | @ |
| P49202 |   |   |   | @ |   |   |  |   |   |   |  |   |
| P49235 |   |   | @ |   |   |   |  |   |   |   |  |   |
| P49299 |   |   |   |   |   |   |  |   |   | @ |  |   |
| P49311 |   |   |   |   |   |   |  |   | @ |   |  |   |
| P49333 |   |   |   |   | @ |   |  |   |   |   |  |   |
| P49364 |   |   |   |   |   |   |  | @ |   |   |  |   |
| P49608 |   |   |   | @ |   |   |  |   |   |   |  |   |
| P49727 |   |   |   |   |   |   |  | @ |   |   |  |   |
| P49972 |   |   |   | @ |   |   |  |   |   |   |  |   |



|        |   |   |   |   |   |   |  |   |   |  |   |   |
|--------|---|---|---|---|---|---|--|---|---|--|---|---|
| P51428 |   |   |   |   |   |   |  | @ |   |  |   |   |
| P52334 |   |   | @ |   |   |   |  |   |   |  |   |   |
| P52399 |   |   |   |   |   | @ |  |   |   |  |   |   |
| P52410 |   |   | @ |   |   |   |  |   |   |  |   |   |
| P52418 |   |   | @ |   |   |   |  |   |   |  |   |   |
| P52420 |   |   | @ |   |   |   |  |   |   |  |   |   |
| P52423 |   |   | @ |   |   |   |  |   |   |  |   |   |
| P52424 |   |   |   |   |   |   |  | @ |   |  |   |   |
| P52572 |   |   |   |   |   |   |  |   | @ |  |   |   |
| P52580 |   |   |   | @ |   |   |  |   |   |  |   |   |
| P52706 |   |   |   |   |   |   |  |   |   |  |   | @ |
| P52902 |   |   |   |   |   |   |  | @ |   |  |   |   |
| P52914 |   |   |   |   |   |   |  |   | @ |  |   |   |
| P53536 |   |   | @ |   |   |   |  |   |   |  |   |   |
| P53537 |   |   |   | @ |   |   |  |   |   |  |   |   |
| P53665 |   |   |   |   |   |   |  | @ |   |  |   |   |
| P53797 |   |   | @ |   |   |   |  |   |   |  |   |   |
| P54211 | @ |   |   |   |   |   |  |   |   |  |   |   |
| P54609 |   | @ |   | @ |   |   |  |   | @ |  |   |   |
| P54774 | @ |   |   |   |   |   |  |   |   |  |   |   |
| P55217 |   |   | @ |   |   |   |  |   |   |  |   |   |
| P56350 |   |   | @ |   |   |   |  |   |   |  |   |   |
| P56809 |   |   | @ |   |   |   |  |   |   |  |   |   |
| P58908 |   |   |   |   |   |   |  |   |   |  |   | @ |
| P59229 |   |   |   |   |   |   |  |   |   |  |   | @ |
| P59287 |   |   | @ |   |   |   |  |   |   |  |   |   |
| P59833 | @ |   |   |   |   |   |  |   |   |  |   |   |
| P62787 |   |   |   |   |   |   |  |   | @ |  |   |   |
| P68209 |   |   |   |   |   |   |  | @ |   |  |   |   |
| P68514 |   |   |   |   |   |   |  | @ |   |  |   |   |
| P80022 |   | @ |   |   |   |   |  |   |   |  |   |   |
| P80030 |   |   | @ |   |   |   |  |   |   |  |   |   |
| P80196 |   |   |   | @ |   |   |  |   |   |  |   |   |
| P80269 |   |   |   |   |   |   |  | @ |   |  |   |   |
| P80691 |   |   |   |   |   | @ |  |   |   |  |   |   |
| P81131 |   |   |   |   |   | @ |  |   |   |  |   |   |
| P82244 |   |   | @ |   |   |   |  |   |   |  |   |   |
| P82411 |   |   | @ |   |   |   |  |   |   |  |   |   |
| P82412 |   |   | @ |   |   |   |  |   |   |  | @ |   |
| P82413 |   |   | @ |   |   |   |  |   |   |  |   |   |
| P82873 |   |   |   |   |   |   |  | @ |   |  |   |   |
| P83291 |   |   |   |   |   |   |  | @ |   |  |   |   |
| P83326 | @ |   |   | @ |   |   |  |   |   |  |   |   |
| P84634 |   |   |   |   |   |   |  |   | @ |  |   |   |
| P92812 |   |   |   |   |   |   |  | @ |   |  |   |   |
| P92939 |   |   |   |   | @ |   |  |   |   |  |   |   |

|        |   |   |   |   |   |   |   |   |  |  |  |   |
|--------|---|---|---|---|---|---|---|---|--|--|--|---|
| P92959 |   |   | @ |   |   |   |   |   |  |  |  |   |
| P92983 |   |   |   |   |   |   | @ |   |  |  |  |   |
| P93022 |   |   |   |   |   |   |   | @ |  |  |  |   |
| P93026 |   |   | @ |   |   | @ |   |   |  |  |  |   |
| P93033 |   |   |   |   |   |   | @ |   |  |  |  |   |
| P93045 |   |   |   |   |   |   |   | @ |  |  |  |   |
| P93164 |   | @ |   |   |   | @ |   |   |  |  |  |   |
| P93184 |   |   | @ |   |   |   |   |   |  |  |  |   |
| P93203 |   |   |   |   |   |   |   | @ |  |  |  |   |
| P93303 |   |   |   |   |   |   | @ |   |  |  |  |   |
| P93339 | @ |   |   |   | @ |   |   |   |  |  |  |   |
| P93349 |   | @ |   |   |   | @ |   |   |  |  |  |   |
| P93508 |   |   |   |   | @ |   |   |   |  |  |  |   |
| P93654 |   |   |   |   |   |   |   |   |  |  |  | @ |
| P93655 |   |   |   |   |   |   | @ |   |  |  |  |   |
| P93788 | @ |   |   |   |   |   |   |   |  |  |  |   |
| P93804 |   |   |   | @ |   |   |   |   |  |  |  |   |
| P93834 |   |   |   |   |   |   | @ |   |  |  |  |   |
| P93836 |   |   |   | @ |   |   |   |   |  |  |  |   |
| P94026 |   |   | @ |   |   |   |   |   |  |  |  |   |
| P94044 |   |   | @ |   |   |   |   |   |  |  |  |   |
| Q00265 |   |   |   |   |   |   |   | @ |  |  |  |   |
| Q00326 |   |   |   |   |   |   |   |   |  |  |  | @ |
| Q00497 |   |   | @ |   |   |   |   |   |  |  |  |   |
| Q00834 |   |   |   | @ |   |   |   |   |  |  |  |   |
| Q00865 |   |   | @ |   |   |   |   |   |  |  |  |   |
| Q01292 |   |   | @ |   |   |   |   |   |  |  |  |   |
| Q01594 |   |   |   |   |   |   |   |   |  |  |  | @ |
| Q01607 |   |   |   |   |   |   | @ |   |  |  |  |   |
| Q02073 |   |   | @ |   |   |   |   |   |  |  |  |   |
| Q02500 |   |   |   |   |   |   | @ |   |  |  |  |   |
| Q03464 |   | @ |   |   |   |   |   |   |  |  |  |   |
| Q03685 |   |   |   |   | @ |   |   |   |  |  |  |   |
| Q04522 |   |   |   | @ |   |   |   |   |  |  |  |   |
| Q04613 |   |   |   |   |   |   | @ |   |  |  |  |   |
| Q04716 |   |   |   |   |   |   | @ |   |  |  |  |   |
| Q05001 |   |   |   |   | @ |   |   |   |  |  |  |   |
| Q05091 |   |   |   |   |   | @ |   |   |  |  |  |   |
| Q05153 |   |   |   |   |   |   |   | @ |  |  |  |   |
| Q05492 |   |   |   |   |   |   | @ |   |  |  |  |   |
| Q05538 |   | @ |   |   |   |   |   |   |  |  |  |   |
| Q05728 |   |   | @ |   |   |   |   |   |  |  |  |   |
| Q05753 |   |   | @ |   |   |   |   |   |  |  |  |   |
| Q06197 |   |   |   | @ |   |   |   |   |  |  |  |   |
| Q06364 |   |   |   |   |   |   |   | @ |  |  |  |   |
| Q06450 |   |   |   |   |   |   | @ |   |  |  |  |   |





|        |  |   |   |   |   |   |  |  |   |   |  |   |
|--------|--|---|---|---|---|---|--|--|---|---|--|---|
| Q40161 |  | @ |   |   |   | @ |  |  |   |   |  |   |
| Q40478 |  |   |   |   |   |   |  |  | @ |   |  |   |
| Q40545 |  |   | @ |   |   |   |  |  |   |   |  |   |
| Q40577 |  |   |   | @ |   |   |  |  |   |   |  |   |
| Q40966 |  |   |   |   |   | @ |  |  |   |   |  |   |
| Q40987 |  |   |   | @ |   |   |  |  |   |   |  |   |
| Q41261 |  |   |   | @ |   |   |  |  |   |   |  |   |
| Q41764 |  |   |   | @ |   |   |  |  |   |   |  |   |
| Q42191 |  |   |   |   |   |   |  |  | @ |   |  |   |
| Q42290 |  |   |   |   |   |   |  |  | @ |   |  |   |
| Q42463 |  |   | @ |   |   |   |  |  |   |   |  |   |
| Q42484 |  |   |   | @ |   |   |  |  |   |   |  |   |
| Q42523 |  |   |   |   |   |   |  |  | @ |   |  |   |
| Q42533 |  |   | @ |   |   |   |  |  |   |   |  |   |
| Q42539 |  |   |   | @ |   |   |  |  |   |   |  |   |
| Q42545 |  |   | @ |   |   |   |  |  |   |   |  |   |
| Q42564 |  |   |   |   |   |   |  |  |   | @ |  |   |
| Q42577 |  |   |   |   |   |   |  |  | @ |   |  |   |
| Q42588 |  |   | @ |   |   |   |  |  |   |   |  |   |
| Q42589 |  | @ |   |   |   |   |  |  |   |   |  |   |
| Q42686 |  |   |   |   |   |   |  |  | @ |   |  |   |
| Q42688 |  |   |   | @ |   |   |  |  |   |   |  |   |
| Q42736 |  |   | @ |   |   |   |  |  |   |   |  |   |
| Q42806 |  |   |   | @ |   |   |  |  |   |   |  |   |
| Q42961 |  |   | @ |   |   |   |  |  |   |   |  |   |
| Q43064 |  |   | @ |   |   |   |  |  |   |   |  |   |
| Q43097 |  |   |   |   |   |   |  |  |   | @ |  |   |
| Q43127 |  |   |   |   |   |   |  |  | @ |   |  |   |
| Q43139 |  |   |   | @ |   |   |  |  |   |   |  |   |
| Q43272 |  |   |   | @ |   |   |  |  |   |   |  |   |
| Q43295 |  |   | @ |   |   |   |  |  |   |   |  |   |
| Q43316 |  |   | @ |   |   |   |  |  |   |   |  |   |
| Q43349 |  |   | @ |   |   |   |  |  |   |   |  |   |
| Q43621 |  |   |   | @ |   |   |  |  |   |   |  |   |
| Q43725 |  |   |   |   |   |   |  |  | @ |   |  |   |
| Q43743 |  |   |   |   |   |   |  |  |   | @ |  |   |
| Q43776 |  |   |   | @ |   |   |  |  |   |   |  |   |
| Q4G2J3 |  |   |   |   | @ |   |  |  |   |   |  |   |
| Q4QSC8 |  |   |   |   |   |   |  |  | @ |   |  |   |
| Q4VYC8 |  |   |   |   |   |   |  |  | @ |   |  |   |
| Q500Y9 |  |   |   | @ |   |   |  |  |   |   |  |   |
| Q52TG1 |  |   | @ |   |   |   |  |  |   |   |  |   |
| Q56WD9 |  |   |   |   |   |   |  |  |   | @ |  |   |
| Q56WK6 |  |   |   | @ |   |   |  |  |   |   |  |   |
| Q56XP4 |  |   |   |   |   |   |  |  |   |   |  | @ |
| Q56YA5 |  |   |   |   |   |   |  |  | @ |   |  |   |





|        |   |   |   |   |   |   |   |  |  |   |
|--------|---|---|---|---|---|---|---|--|--|---|
| Q8LPU4 |   |   | @ |   |   |   | @ |  |  |   |
| Q8MA04 |   | @ |   |   |   |   |   |  |  |   |
| Q8RUW5 |   |   |   |   |   |   |   |  |  | @ |
| Q8RVQ9 |   |   |   |   |   |   | @ |  |  |   |
| Q8RXL8 |   |   |   |   | @ |   |   |  |  |   |
| Q8RY95 |   |   | @ |   |   |   | @ |  |  |   |
| Q8RY99 |   |   |   |   |   | @ |   |  |  |   |
| Q8S307 |   |   |   |   |   |   | @ |  |  |   |
| Q8S3N1 |   |   | @ |   |   |   | @ |  |  |   |
| Q8S944 |   |   |   |   |   | @ |   |  |  |   |
| Q8S9K3 |   | @ |   |   |   |   |   |  |  |   |
| Q8SAY0 |   | @ |   |   |   |   |   |  |  |   |
| Q8VWG3 |   |   |   |   |   |   | @ |  |  |   |
| Q8VXU6 |   |   | @ | @ |   |   |   |  |  |   |
| Q8VY06 |   |   |   |   |   |   | @ |  |  |   |
| Q8VY26 |   | @ |   |   |   |   |   |  |  |   |
| Q8VY97 |   |   |   | @ |   |   |   |  |  |   |
| Q8VYE2 |   |   |   |   |   |   | @ |  |  |   |
| Q8VYI9 | @ |   |   |   |   |   |   |  |  |   |
| Q8VYK7 |   |   | @ |   |   |   |   |  |  | @ |
| Q8VYM2 | @ |   |   |   |   |   |   |  |  |   |
| Q8VYN6 |   | @ |   |   |   |   |   |  |  |   |
| Q8W037 |   |   |   | @ |   |   |   |  |  |   |
| Q8W1K8 |   |   |   |   |   |   | @ |  |  |   |
| Q8W2B8 |   |   | @ |   |   |   |   |  |  |   |
| Q8W420 |   |   |   |   |   |   | @ |  |  |   |
| Q8W486 |   |   |   |   | @ |   |   |  |  |   |
| Q8W487 |   |   |   |   |   |   | @ |  |  |   |
| Q8W575 |   |   | @ |   |   |   | @ |  |  |   |
| Q8W5S1 |   |   | @ |   |   |   | @ |  |  |   |
| Q8WHX7 |   | @ |   |   |   |   |   |  |  |   |
| Q93WK5 |   |   |   |   |   |   | @ |  |  |   |
| Q93WX6 |   | @ |   |   |   |   |   |  |  |   |
| Q93XM7 |   |   |   |   |   |   | @ |  |  |   |
| Q93XX5 | @ |   |   |   |   |   |   |  |  |   |
| Q93Y32 |   |   |   |   |   |   | @ |  |  |   |
| Q93Y52 |   | @ |   |   |   |   |   |  |  |   |
| Q93YW0 |   | @ |   |   |   |   |   |  |  |   |
| Q93ZG7 |   |   | @ |   |   |   |   |  |  |   |
| Q93ZN9 |   | @ |   |   |   |   |   |  |  |   |
| Q940M2 |   |   |   |   |   |   | @ |  |  |   |
| Q941R4 |   |   |   |   | @ |   |   |  |  |   |
| Q943Z6 |   |   | @ |   |   |   |   |  |  |   |
| Q944C1 | @ |   | @ |   |   |   |   |  |  |   |
| Q944I4 |   | @ |   |   |   |   |   |  |  |   |
| Q946J8 |   |   |   |   |   |   | @ |  |  |   |



|        |   |   |   |   |   |   |   |   |   |  |   |  |
|--------|---|---|---|---|---|---|---|---|---|--|---|--|
| Q946Y7 |   | @ |   |   |   | @ |   |   |   |  |   |  |
| Q948J9 |   |   | @ |   |   |   |   |   |   |  |   |  |
| Q948U0 | @ |   |   |   |   |   |   |   |   |  |   |  |
| Q949J1 |   |   |   |   |   |   | @ |   |   |  |   |  |
| Q949U1 |   |   |   |   | @ |   |   |   |   |  |   |  |
| Q94A28 |   |   |   |   |   |   | @ |   |   |  |   |  |
| Q94AA4 |   |   |   | @ |   |   |   |   |   |  |   |  |
| Q94AH6 |   |   |   | @ |   |   |   | @ |   |  |   |  |
| Q94BT2 | @ |   |   |   |   |   |   |   |   |  |   |  |
| Q94BZ7 |   |   |   |   |   |   | @ |   |   |  |   |  |
| Q94CC0 |   |   |   |   | @ |   |   |   |   |  |   |  |
| Q94CD8 | @ |   |   |   |   |   |   |   |   |  |   |  |
| Q94CL9 |   |   |   |   |   |   |   | @ |   |  |   |  |
| Q94EG3 |   |   |   |   |   | @ |   |   |   |  |   |  |
| Q94F08 | @ |   |   |   |   |   |   |   |   |  |   |  |
| Q94FY8 |   |   | @ |   |   |   |   |   |   |  |   |  |
| Q94IC4 |   |   | @ |   |   |   |   |   |   |  |   |  |
| Q94JU3 |   |   |   | @ |   |   |   | @ |   |  |   |  |
| Q94JY4 |   |   |   | @ |   |   |   |   |   |  |   |  |
| Q94KE2 |   |   |   |   |   |   |   | @ |   |  |   |  |
| Q94KU5 |   |   | @ |   |   |   |   |   |   |  |   |  |
| Q96247 | @ |   |   | @ |   |   |   |   |   |  |   |  |
| Q96252 |   |   |   |   |   |   | @ |   |   |  |   |  |
| Q96255 |   |   | @ |   |   |   |   |   |   |  |   |  |
| Q96291 |   |   | @ |   |   |   |   |   |   |  |   |  |
| Q96301 |   |   |   | @ |   |   |   | @ |   |  |   |  |
| Q96329 |   |   |   |   |   |   |   |   | @ |  |   |  |
| Q96529 |   |   | @ |   |   |   |   |   |   |  |   |  |
| Q9ASY8 |   |   |   |   |   |   | @ |   |   |  |   |  |
| Q9ATB4 |   |   |   |   |   |   |   | @ |   |  |   |  |
| Q9C519 |   |   |   |   |   |   |   | @ |   |  |   |  |
| Q9C5W3 |   |   | @ |   |   |   |   |   |   |  |   |  |
| Q9C5X3 |   |   |   | @ |   |   |   |   |   |  |   |  |
| Q9C5X4 |   |   |   | @ |   |   |   | @ |   |  |   |  |
| Q9C616 |   |   |   |   |   |   | @ |   |   |  |   |  |
| Q9C7F7 | @ |   |   |   |   |   |   |   |   |  |   |  |
| Q9C801 |   |   |   |   |   |   |   | @ |   |  |   |  |
| Q9C826 |   |   |   | @ |   |   |   |   |   |  |   |  |
| Q9C895 |   |   |   |   |   |   |   | @ |   |  |   |  |
| Q9C8G9 |   |   |   |   |   |   |   |   |   |  | @ |  |
| Q9C9C9 |   |   |   | @ |   |   |   |   |   |  |   |  |
| Q9C9E3 |   |   |   |   |   |   |   | @ |   |  |   |  |
| Q9C9H5 |   | @ |   |   |   |   |   |   |   |  |   |  |
| Q9CA19 |   |   |   |   |   |   | @ |   |   |  |   |  |
| Q9CAF5 |   |   | @ |   |   |   |   |   |   |  |   |  |
| Q9CAF6 |   |   | @ |   |   |   | @ |   |   |  |   |  |



|        |   |   |   |   |   |   |   |   |  |   |
|--------|---|---|---|---|---|---|---|---|--|---|
| Q9LG26 |   |   | @ |   |   |   | @ |   |  |   |
| Q9LHE5 |   |   |   |   |   |   | @ |   |  |   |
| Q9LHS9 |   |   |   |   |   |   | @ |   |  |   |
| Q9LIG6 |   |   |   |   |   |   | @ |   |  |   |
| Q9LJD7 |   |   |   |   |   |   | @ |   |  |   |
| Q9LK23 |   |   | @ |   |   |   |   |   |  |   |
| Q9LK31 |   |   |   |   |   | @ |   |   |  |   |
| Q9LKA5 |   |   |   |   |   |   | @ |   |  |   |
| Q9LKW9 | @ |   |   |   |   |   |   |   |  |   |
| Q9LN63 |   |   | @ |   |   |   |   |   |  |   |
| Q9LPM9 |   |   | @ |   |   |   |   |   |  |   |
| Q9LQI7 |   |   |   |   |   |   | @ |   |  |   |
| Q9LQL0 |   |   |   |   |   |   | @ |   |  |   |
| Q9LQU4 | @ |   |   |   |   |   |   |   |  |   |
| Q9LR78 |   |   |   |   |   |   |   | @ |  |   |
| Q9LRE6 |   |   |   |   |   |   |   | @ |  |   |
| Q9LRY0 |   |   |   |   |   |   |   | @ |  |   |
| Q9LS01 |   |   | @ |   |   |   |   |   |  |   |
| Q9LS42 |   |   |   |   |   | @ |   |   |  |   |
| Q9LSW8 |   |   |   |   |   |   | @ |   |  |   |
| Q9LTR9 |   |   | @ |   |   |   |   |   |  |   |
| Q9LTS3 |   |   |   | @ |   |   |   |   |  |   |
| Q9LV58 |   |   | @ |   |   |   |   | @ |  |   |
| Q9LVM5 | @ |   |   |   |   |   |   |   |  |   |
| Q9LW07 | @ |   |   |   |   |   |   |   |  |   |
| Q9LWB5 |   |   | @ |   |   |   |   |   |  |   |
| Q9LX20 | @ |   |   |   |   |   |   |   |  |   |
| Q9LX99 |   |   |   |   |   |   |   | @ |  |   |
| Q9LZ98 |   |   | @ |   |   |   |   |   |  |   |
| Q9M069 |   | @ |   |   |   |   |   |   |  |   |
| Q9M099 |   |   |   |   | @ |   |   |   |  |   |
| Q9M0V3 |   |   |   |   |   |   |   | @ |  |   |
| Q9M1G9 |   | @ |   |   |   |   |   |   |  |   |
| Q9M2Y6 |   |   |   |   |   | @ |   |   |  |   |
| Q9M385 |   |   | @ |   |   |   |   |   |  |   |
| Q9M3D6 |   |   |   |   |   |   |   |   |  | @ |
| Q9M4G5 |   |   | @ |   |   |   |   |   |  |   |
| Q9M4W3 |   |   | @ |   |   |   |   |   |  |   |
| Q9M571 |   |   | @ |   |   |   |   |   |  |   |
| Q9M7T0 |   |   |   |   |   |   | @ |   |  |   |
| Q9M8U1 |   |   |   |   |   |   |   |   |  | @ |
| Q9M8W5 |   |   |   | @ |   |   |   |   |  |   |
| Q9MTI5 |   |   | @ |   |   |   |   |   |  |   |
| Q9MTM6 |   |   | @ |   |   |   |   |   |  |   |
| Q9MTM7 |   |   | @ |   |   |   |   |   |  |   |
| Q9MTM9 |   |   | @ |   |   |   |   |   |  |   |

|        |   |   |   |   |   |   |   |   |  |   |   |   |  |
|--------|---|---|---|---|---|---|---|---|--|---|---|---|--|
| Q9MTN0 |   |   | @ |   |   |   |   |   |  |   |   |   |  |
| Q9MTN3 |   |   | @ |   |   |   |   |   |  |   |   |   |  |
| Q9MTN4 |   |   | @ |   |   |   |   |   |  |   |   |   |  |
| Q9MTN9 |   |   | @ |   |   |   |   |   |  |   |   |   |  |
| Q9MTP2 |   |   | @ |   |   |   |   |   |  |   |   |   |  |
| Q9MTP8 |   |   | @ |   |   |   |   |   |  |   |   |   |  |
| Q9MUL5 |   |   | @ |   |   |   |   |   |  |   |   |   |  |
| Q9MUL6 |   |   | @ |   |   |   |   |   |  |   |   |   |  |
| Q9MUL7 |   |   | @ |   |   |   |   |   |  |   |   |   |  |
| Q9MUM6 |   |   | @ |   |   |   |   |   |  |   |   |   |  |
| Q9MUM7 |   |   | @ |   |   |   |   |   |  |   |   |   |  |
| Q9MUN5 |   |   | @ |   |   |   |   |   |  |   |   |   |  |
| Q9MUP3 |   |   | @ |   |   |   |   |   |  |   |   |   |  |
| Q9MUQ5 |   |   | @ |   |   |   |   |   |  |   |   |   |  |
| Q9MUQ8 |   |   | @ |   |   |   |   |   |  |   |   |   |  |
| Q9MUR1 |   |   | @ |   |   |   |   |   |  |   |   |   |  |
| Q9MUR2 |   |   | @ |   |   |   |   |   |  |   |   |   |  |
| Q9MUT3 |   |   | @ |   |   |   |   |   |  |   |   |   |  |
| Q9MV14 |   |   | @ |   |   |   |   |   |  |   |   |   |  |
| Q9S775 |   |   |   |   |   |   |   |   |  | @ |   |   |  |
| Q9S7B2 |   |   |   |   |   |   |   |   |  | @ |   |   |  |
| Q9S7B5 |   |   | @ |   |   |   |   |   |  |   |   |   |  |
| Q9S7E4 |   |   |   |   |   |   |   | @ |  |   |   |   |  |
| Q9S7T7 |   |   |   |   |   |   |   |   |  | @ |   |   |  |
| Q9S7W5 |   |   | @ |   |   |   |   |   |  |   |   |   |  |
| Q9S7Y7 |   | @ |   |   |   | @ |   |   |  |   |   |   |  |
| Q9S850 |   |   |   |   |   |   |   |   |  |   | @ |   |  |
| Q9SA23 |   |   |   |   |   |   | @ |   |  |   |   |   |  |
| Q9SA77 |   |   |   |   |   |   | @ |   |  |   |   |   |  |
| Q9SAK4 |   |   |   |   |   |   |   | @ |  |   |   |   |  |
| Q9SBK6 |   |   |   | @ |   |   |   |   |  | @ |   |   |  |
| Q9SCB9 |   |   |   |   |   |   |   |   |  |   |   | @ |  |
| Q9SCJ9 |   |   |   |   |   |   |   |   |  | @ |   |   |  |
| Q9SCX9 |   |   | @ |   |   |   |   |   |  |   |   |   |  |
| Q9SD53 | @ |   |   |   |   |   |   |   |  |   |   |   |  |
| Q9SD80 |   |   |   |   |   |   |   | @ |  |   |   |   |  |
| Q9SE20 |   |   | @ |   |   |   |   |   |  |   |   |   |  |
| Q9SE42 |   |   |   | @ |   |   |   |   |  |   |   |   |  |
| Q9SE43 |   |   |   |   |   |   |   |   |  | @ |   |   |  |
| Q9SE50 |   |   |   |   | @ |   |   |   |  |   |   |   |  |
| Q9SE83 |   |   |   | @ |   |   | @ |   |  |   |   |   |  |
| Q9SEL5 |   |   |   |   |   |   | @ |   |  |   |   |   |  |
| Q9SF32 |   |   |   |   |   |   |   |   |  | @ |   |   |  |
| Q9SHI1 |   |   | @ |   |   |   |   |   |  |   |   |   |  |
| Q9SHJ5 |   |   |   |   |   |   |   | @ |  |   |   |   |  |
| Q9SJ12 |   |   |   |   |   |   |   | @ |  |   |   |   |  |

|        |   |   |   |   |   |   |   |   |   |  |   |   |
|--------|---|---|---|---|---|---|---|---|---|--|---|---|
| Q9SKK0 |   |   |   |   |   |   |   |   | @ |  |   |   |
| Q9SLG2 |   |   |   |   | @ |   |   |   |   |  |   |   |
| Q9SLN5 |   |   |   | @ |   |   |   |   |   |  |   |   |
| Q9SLX0 |   |   |   | @ |   |   |   |   |   |  |   |   |
| Q9SMH4 |   |   | @ |   |   |   |   |   |   |  |   |   |
| Q9SMN1 |   |   |   |   |   |   |   | @ |   |  |   |   |
| Q9SMZ4 |   |   |   | @ |   |   |   |   |   |  |   |   |
| Q9SQI2 |   |   |   |   |   |   |   |   | @ |  |   |   |
| Q9SR43 |   |   | @ |   |   |   |   |   |   |  |   |   |
| Q9SSX0 |   |   |   | @ |   |   |   |   |   |  |   |   |
| Q9ST69 |   |   | @ |   |   |   |   |   |   |  |   |   |
| Q9SU40 |   | @ |   |   |   |   |   |   |   |  |   |   |
| Q9SUC9 | @ |   |   |   |   |   |   |   |   |  |   |   |
| Q9SUI6 |   |   | @ |   |   |   |   |   |   |  |   |   |
| Q9SV84 | @ |   |   |   |   |   |   |   |   |  |   |   |
| Q9SVG4 | @ |   |   |   |   |   |   |   |   |  |   |   |
| Q9SWG0 |   |   |   |   |   |   |   | @ |   |  |   |   |
| Q9SWH4 |   |   |   |   |   |   | @ |   |   |  |   |   |
| Q9SWI1 |   |   |   | @ |   |   |   |   |   |  |   |   |
| Q9SWI6 |   |   | @ |   |   |   |   |   |   |  |   |   |
| Q9SWR3 |   |   |   | @ |   |   |   |   |   |  |   |   |
| Q9SX77 |   |   |   |   |   |   |   | @ |   |  |   |   |
| Q9SXZ2 |   |   |   |   |   |   |   |   | @ |  |   |   |
| Q9SYM4 |   | @ |   | @ |   |   |   |   |   |  |   | @ |
| Q9SYT0 |   |   |   | @ |   |   |   |   |   |  |   |   |
| Q9SZ30 |   |   | @ |   |   |   |   |   |   |  |   |   |
| Q9SZF7 |   |   |   | @ |   |   |   |   |   |  |   |   |
| Q9SZW5 |   |   |   |   |   |   |   |   |   |  |   | @ |
| Q9T041 |   |   |   | @ |   |   |   |   |   |  |   |   |
| Q9T052 |   |   | @ | @ |   |   |   |   |   |  |   |   |
| Q9T076 | @ |   |   |   |   |   |   |   |   |  |   |   |
| Q9T0N8 |   |   |   |   |   | @ |   |   |   |  |   |   |
| Q9TIR8 |   |   |   |   |   |   |   |   |   |  | @ |   |
| Q9TJQ6 |   |   |   |   |   |   |   |   |   |  | @ |   |
| Q9TJQ7 |   |   |   |   |   |   |   |   |   |  | @ |   |
| Q9TJQ9 |   |   |   |   |   |   |   |   |   |  | @ |   |
| Q9TKU9 |   |   | @ |   |   |   |   |   |   |  |   |   |
| Q9TL05 |   |   | @ |   |   |   |   |   |   |  |   |   |
| Q9TL10 |   |   | @ |   |   |   |   |   |   |  |   |   |
| Q9TL28 |   |   | @ |   |   |   |   |   |   |  |   |   |
| Q9XF62 |   |   |   |   |   |   |   |   | @ |  |   |   |
| Q9XFA2 |   |   |   | @ |   |   |   |   |   |  |   |   |
| Q9XFM6 | @ |   |   |   |   |   |   |   |   |  |   |   |
| Q9XFS9 |   |   | @ |   |   |   |   |   |   |  |   |   |
| Q9XG54 |   |   |   | @ |   |   |   |   |   |  |   |   |
| Q9XG57 |   |   |   |   |   |   |   |   | @ |  |   |   |

|        |   |  |   |   |   |  |   |   |   |   |  |   |
|--------|---|--|---|---|---|--|---|---|---|---|--|---|
| Q9XGM2 |   |  |   |   |   |  |   |   | @ |   |  |   |
| Q9XGN1 |   |  |   | @ |   |  |   |   |   |   |  |   |
| Q9XH48 |   |  |   |   |   |  |   | @ |   |   |  |   |
| Q9XI00 |   |  |   |   |   |  |   | @ |   |   |  |   |
| Q9XIA7 |   |  |   |   |   |  |   | @ |   |   |  |   |
| Q9XIE2 | @ |  |   |   |   |  |   |   |   |   |  |   |
| Q9XIR4 |   |  | @ |   |   |  |   |   |   |   |  |   |
| Q9XJ27 |   |  | @ |   |   |  |   |   |   |   |  |   |
| Q9ZNR6 |   |  |   | @ |   |  |   |   |   |   |  |   |
| Q9ZNT9 |   |  |   |   |   |  |   |   | @ |   |  |   |
| Q9ZS51 |   |  |   |   |   |  |   |   |   | @ |  |   |
| Q9ZS97 |   |  | @ |   |   |  |   |   |   |   |  |   |
| Q9ZST0 |   |  | @ |   |   |  |   |   |   |   |  |   |
| Q9ZSY2 |   |  |   | @ | @ |  | @ |   |   |   |  |   |
| Q9ZSZ8 |   |  |   |   |   |  |   |   | @ |   |  |   |
| Q9ZT50 |   |  |   | @ |   |  |   |   | @ |   |  |   |
| Q9ZT63 |   |  |   |   |   |  |   |   |   |   |  | @ |
| Q9ZUX4 |   |  |   |   |   |  |   | @ |   |   |  |   |
| Q9ZVD3 |   |  |   |   |   |  |   |   | @ |   |  |   |
| Q9ZWR8 |   |  |   | @ |   |  |   |   |   |   |  |   |
