# Supplementary material for: pLoc-mPlant: predict subcellular localization of multi-location plant proteins by incorporating the optimal GO information into general PseAAC
Source: Royal Society of Chemistry journal article supplement (doi:10.1039/c7mb00267j), 2017-07-12
Supplement: c7mb00267j3.pdf [file c7mb00267j3.pdf]

**Supporting Information S3. List of the 978 plant proteins expressed by the 12-D vector.** The protein codes are arranged according to their alphabetical order.

| Protein code | 12-D vector for the plant proteins |      |      |      |      |      |      |      |      |      |      |      |
|--------------|------------------------------------|------|------|------|------|------|------|------|------|------|------|------|
|              | 1                                  | 2    | 3    | 4    | 5    | 6    | 7    | 8    | 9    | 10   | 11   | 12   |
| A1E9S2       | 0.01                               | 0.01 | 0.85 | 0.20 | 0.01 | 0.02 | 0.00 | 0.26 | 0.08 | 0.01 | 0.31 | 0.01 |
| A1E9W1       | 0.01                               | 0.01 | 1.00 | 0.57 | 0.01 | 0.02 | 0.00 | 0.33 | 0.14 | 0.01 | 0.31 | 0.01 |
| A1E9Z1       | 0.24                               | 0.03 | 1.00 | 0.13 | 0.18 | 0.00 | 0.12 | 0.26 | 0.07 | 0.03 | 0.12 | 0.15 |
| A1YKT1       | 0.01                               | 0.01 | 0.67 | 0.40 | 0.05 | 0.00 | 0.02 | 0.09 | 1.00 | 0.00 | 0.06 | 0.01 |
| A2CI50       | 0.05                               | 0.09 | 0.85 | 0.47 | 0.06 | 0.10 | 0.00 | 0.67 | 0.03 | 0.09 | 0.12 | 0.06 |
| A2CI69       | 0.01                               | 0.00 | 0.85 | 0.18 | 0.03 | 0.00 | 0.00 | 0.09 | 0.85 | 0.01 | 0.12 | 0.01 |
| A2WWV5       | 0.52                               | 0.05 | 0.10 | 1.00 | 0.12 | 0.00 | 0.08 | 0.25 | 0.22 | 0.03 | 0.00 | 0.10 |
| A2XLV9       | 0.31                               | 0.01 | 0.18 | 0.24 | 0.15 | 0.00 | 0.00 | 0.03 | 0.85 | 0.00 | 0.06 | 0.08 |
| A2XMB2       | 0.08                               | 0.07 | 0.01 | 0.21 | 0.30 | 0.07 | 0.04 | 0.04 | 0.03 | 0.01 | 0.00 | 0.70 |
| A2Y3Q5       | 0.08                               | 0.00 | 0.85 | 0.22 | 0.01 | 0.00 | 0.00 | 0.50 | 0.03 | 0.06 | 0.12 | 0.08 |
| A2YDY2       | 0.02                               | 0.02 | 0.54 | 0.77 | 0.02 | 0.02 | 0.02 | 0.20 | 0.22 | 0.01 | 0.31 | 0.02 |
| A2YMU2       | 0.50                               | 0.08 | 1.00 | 0.33 | 0.12 | 0.06 | 0.00 | 0.73 | 0.33 | 0.08 | 0.20 | 0.08 |
| A2ZB00       | 0.02                               | 0.02 | 0.48 | 0.77 | 0.02 | 0.00 | 0.02 | 0.20 | 0.22 | 0.00 | 0.21 | 0.02 |
| A2ZDX9       | 0.02                               | 0.02 | 0.09 | 1.00 | 0.33 | 0.00 | 0.02 | 0.05 | 0.33 | 0.00 | 0.00 | 0.02 |
| A3AZ88       | 0.05                               | 0.04 | 0.27 | 0.77 | 0.04 | 0.01 | 0.03 | 0.33 | 0.33 | 0.04 | 0.02 | 0.05 |
| A4GYN8       | 0.01                               | 0.01 | 0.85 | 0.20 | 0.01 | 0.02 | 0.00 | 0.26 | 0.08 | 0.01 | 0.31 | 0.01 |
| A4QJK7       | 0.08                               | 0.02 | 0.88 | 0.26 | 0.40 | 0.01 | 0.01 | 0.31 | 0.18 | 0.30 | 0.33 | 0.08 |
| A7M934       | 0.00                               | 0.01 | 0.84 | 0.18 | 0.00 | 0.02 | 0.00 | 0.26 | 0.08 | 0.00 | 0.31 | 0.00 |
| A7M988       | 0.13                               | 0.20 | 0.84 | 0.17 | 0.25 | 0.12 | 0.04 | 0.40 | 0.15 | 0.00 | 0.20 | 0.13 |
| A8MQY1       | 0.24                               | 0.03 | 0.25 | 0.33 | 1.00 | 0.00 | 0.13 | 0.26 | 1.00 | 0.03 | 0.06 | 0.15 |
| A8W3F3       | 0.02                               | 0.02 | 0.84 | 0.24 | 0.04 | 0.01 | 0.02 | 0.17 | 0.70 | 0.03 | 0.31 | 0.02 |
| O04005       | 0.08                               | 0.02 | 0.40 | 1.00 | 0.08 | 0.01 | 0.02 | 0.31 | 0.84 | 0.17 | 0.03 | 0.02 |
| O04016       | 0.03                               | 0.02 | 0.79 | 1.00 | 0.06 | 0.01 | 0.02 | 0.31 | 0.22 | 0.08 | 0.03 | 0.02 |
| O04057       | 0.50                               | 0.13 | 0.30 | 0.20 | 0.10 | 0.12 | 0.04 | 0.20 | 0.15 | 0.15 | 0.08 | 0.62 |
| O04104       | 0.50                               | 0.01 | 0.31 | 0.17 | 0.06 | 0.01 | 0.00 | 0.31 | 0.01 | 1.00 | 0.03 | 0.02 |
| O04130       | 0.07                               | 0.09 | 1.00 | 0.44 | 0.08 | 0.10 | 0.05 | 0.31 | 0.84 | 0.15 | 0.12 | 0.06 |
| O04147       | 0.13                               | 0.13 | 0.14 | 1.00 | 0.04 | 0.12 | 0.03 | 0.09 | 0.22 | 0.00 | 0.01 | 0.12 |
| O04300       | 0.50                               | 1.00 | 0.41 | 0.29 | 0.09 | 0.42 | 1.00 | 0.21 | 0.14 | 0.04 | 0.05 | 0.07 |
| O04433       | 0.02                               | 0.02 | 0.51 | 1.00 | 0.02 | 0.02 | 0.02 | 0.16 | 0.22 | 0.00 | 0.21 | 0.02 |
| O04479       | 0.07                               | 0.02 | 0.08 | 0.40 | 0.10 | 0.00 | 0.05 | 0.09 | 1.00 | 0.02 | 0.00 | 0.04 |
| O04630       | 0.52                               | 0.65 | 0.85 | 1.00 | 0.12 | 0.17 | 0.38 | 1.00 | 0.22 | 0.04 | 0.20 | 0.10 |
| O04847       | 0.04                               | 0.02 | 0.43 | 1.00 | 0.06 | 0.01 | 0.02 | 0.31 | 0.22 | 0.08 | 0.03 | 0.05 |
| O20118       | 0.01                               | 0.00 | 0.85 | 0.02 | 0.01 | 0.00 | 0.00 | 0.09 | 0.02 | 0.01 | 0.12 | 0.01 |
| O20120       | 0.01                               | 0.00 | 0.85 | 0.02 | 0.01 | 0.00 | 0.00 | 0.09 | 0.02 | 0.01 | 0.12 | 0.01 |
| O20130       | 0.01                               | 0.00 | 0.85 | 0.02 | 0.01 | 0.00 | 0.00 | 0.09 | 0.02 | 0.01 | 0.12 | 0.01 |
| O20133       | 0.01                               | 0.00 | 0.85 | 0.02 | 0.01 | 0.00 | 0.00 | 0.09 | 0.02 | 0.01 | 0.12 | 0.01 |
| O20142       | 0.01                               | 0.00 | 0.85 | 0.02 | 0.01 | 0.00 | 0.00 | 0.09 | 0.02 | 0.01 | 0.12 | 0.01 |
| O20143       | 0.01                               | 0.00 | 0.85 | 0.02 | 0.01 | 0.00 | 0.00 | 0.09 | 0.02 | 0.01 | 0.12 | 0.01 |
| O20159       | 0.01                               | 0.00 | 0.85 | 0.02 | 0.01 | 0.00 | 0.00 | 0.09 | 0.02 | 0.01 | 0.12 | 0.01 |
| O20162       | 0.01                               | 0.00 | 0.85 | 0.02 | 0.01 | 0.00 | 0.00 | 0.09 | 0.02 | 0.01 | 0.12 | 0.01 |
| O20173       | 0.01                               | 0.00 | 0.85 | 0.02 | 0.01 | 0.00 | 0.00 | 0.09 | 0.02 | 0.01 | 0.12 | 0.01 |
| O22043       | 0.04                               | 0.02 | 0.67 | 0.25 | 0.33 | 0.01 | 0.02 | 0.89 | 0.18 | 0.03 | 0.05 | 0.05 |

|        |      |      |      |      |      |      |      |      |      |      |      |      |
|--------|------|------|------|------|------|------|------|------|------|------|------|------|
| O22161 | 0.07 | 0.02 | 0.09 | 0.77 | 0.03 | 0.00 | 0.05 | 0.09 | 1.00 | 0.02 | 0.00 | 0.04 |
| O22213 | 0.17 | 0.04 | 0.38 | 0.20 | 0.50 | 0.33 | 0.04 | 0.31 | 0.03 | 0.14 | 0.03 | 1.00 |
| O22218 | 0.60 | 0.13 | 0.85 | 0.25 | 0.33 | 0.12 | 0.17 | 0.58 | 0.30 | 0.04 | 0.03 | 1.00 |
| O22424 | 0.02 | 0.02 | 0.54 | 0.77 | 0.02 | 0.02 | 0.02 | 0.20 | 0.22 | 0.01 | 0.31 | 0.02 |
| O22446 | 0.13 | 0.13 | 0.18 | 0.33 | 0.04 | 0.12 | 0.05 | 0.09 | 1.00 | 0.02 | 0.06 | 0.12 |
| O22518 | 0.02 | 0.02 | 0.48 | 1.00 | 0.02 | 0.00 | 0.02 | 0.26 | 0.22 | 0.01 | 0.26 | 0.02 |
| O22607 | 0.50 | 0.05 | 0.27 | 0.77 | 0.05 | 0.25 | 0.05 | 0.25 | 1.00 | 0.05 | 0.06 | 0.05 |
| O22886 | 0.33 | 0.04 | 1.00 | 0.44 | 0.03 | 0.01 | 0.03 | 0.25 | 0.20 | 0.06 | 0.12 | 0.08 |
| O23051 | 0.50 | 0.03 | 0.50 | 0.40 | 1.00 | 0.01 | 0.12 | 0.33 | 0.79 | 0.13 | 0.20 | 0.17 |
| O23138 | 0.15 | 0.09 | 0.31 | 0.44 | 0.13 | 0.01 | 0.38 | 1.00 | 0.80 | 0.13 | 0.03 | 0.41 |
| O23492 | 1.00 | 0.05 | 0.23 | 0.33 | 0.18 | 0.00 | 0.12 | 0.67 | 0.07 | 0.03 | 0.00 | 0.26 |
| O23627 | 0.38 | 0.09 | 0.50 | 1.00 | 0.09 | 0.08 | 0.80 | 1.00 | 0.33 | 0.04 | 0.20 | 0.08 |
| O23826 | 0.08 | 0.14 | 0.35 | 0.79 | 0.05 | 0.00 | 0.17 | 0.28 | 0.71 | 0.01 | 0.03 | 0.13 |
| O23979 | 0.20 | 0.13 | 0.61 | 0.77 | 0.04 | 0.12 | 0.20 | 0.33 | 0.22 | 0.02 | 0.04 | 0.20 |
| O24047 | 0.09 | 0.18 | 0.38 | 0.77 | 0.08 | 0.18 | 0.02 | 0.59 | 0.22 | 0.50 | 0.03 | 0.11 |
| O24163 | 0.03 | 0.01 | 0.92 | 0.17 | 0.06 | 0.01 | 0.00 | 0.50 | 0.02 | 0.08 | 0.12 | 0.02 |
| O24164 | 0.03 | 0.01 | 0.86 | 0.17 | 0.06 | 0.01 | 0.00 | 0.89 | 0.01 | 0.08 | 0.03 | 0.02 |
| O24174 | 0.05 | 0.09 | 0.50 | 0.33 | 0.06 | 0.10 | 0.00 | 0.31 | 0.01 | 1.00 | 0.03 | 0.06 |
| O24454 | 0.14 | 0.13 | 0.16 | 0.57 | 0.14 | 0.12 | 0.14 | 0.20 | 1.00 | 0.00 | 0.04 | 0.29 |
| O24463 | 0.04 | 0.02 | 0.27 | 0.24 | 0.04 | 0.01 | 0.01 | 0.18 | 0.85 | 0.02 | 0.06 | 0.05 |
| O24474 | 0.08 | 0.09 | 1.00 | 0.26 | 0.04 | 0.10 | 0.01 | 0.18 | 0.18 | 0.09 | 0.12 | 0.08 |
| O24495 | 0.15 | 0.13 | 0.27 | 0.50 | 0.11 | 0.12 | 0.03 | 1.00 | 0.32 | 0.02 | 0.02 | 0.12 |
| O24496 | 0.13 | 0.13 | 0.27 | 0.77 | 0.04 | 0.12 | 0.03 | 0.50 | 0.22 | 0.04 | 0.02 | 0.12 |
| O24591 | 0.13 | 0.13 | 0.30 | 0.30 | 0.04 | 0.12 | 0.03 | 0.25 | 1.00 | 0.05 | 0.06 | 0.12 |
| O24606 | 0.07 | 0.17 | 0.24 | 0.33 | 0.50 | 0.06 | 0.05 | 0.17 | 1.00 | 0.02 | 0.06 | 0.17 |
| O47027 | 0.01 | 0.01 | 0.85 | 0.20 | 0.01 | 0.00 | 0.00 | 0.71 | 0.04 | 0.01 | 0.26 | 0.01 |
| O47032 | 0.01 | 0.01 | 0.84 | 0.20 | 0.00 | 0.02 | 0.00 | 0.26 | 0.08 | 0.01 | 0.31 | 0.00 |
| O48593 | 0.08 | 0.02 | 1.00 | 0.77 | 0.04 | 0.00 | 0.02 | 1.00 | 0.68 | 0.04 | 0.20 | 0.04 |
| O48626 | 0.24 | 0.14 | 0.15 | 1.00 | 0.90 | 0.00 | 0.33 | 0.32 | 0.84 | 0.03 | 0.00 | 0.16 |
| O48917 | 0.14 | 0.13 | 1.00 | 0.50 | 0.50 | 0.12 | 0.03 | 0.50 | 0.43 | 0.09 | 0.12 | 0.12 |
| O48963 | 0.52 | 0.07 | 0.46 | 1.00 | 0.25 | 0.04 | 0.17 | 0.28 | 0.84 | 0.40 | 0.05 | 0.62 |
| O49044 | 0.06 | 0.02 | 0.50 | 0.77 | 0.06 | 0.20 | 0.02 | 0.31 | 0.22 | 0.12 | 0.03 | 0.05 |
| O49048 | 0.24 | 0.11 | 0.14 | 0.50 | 0.12 | 0.00 | 0.80 | 0.32 | 0.49 | 0.03 | 0.00 | 0.83 |
| O49203 | 0.24 | 0.09 | 0.85 | 0.44 | 0.09 | 0.01 | 0.38 | 1.00 | 0.32 | 0.12 | 0.12 | 0.05 |
| O49543 | 0.08 | 0.04 | 0.50 | 0.26 | 0.04 | 0.04 | 0.05 | 1.00 | 0.49 | 0.09 | 0.05 | 0.05 |
| O49937 | 0.01 | 0.01 | 0.85 | 0.18 | 0.03 | 0.02 | 0.00 | 0.20 | 0.85 | 0.01 | 0.31 | 0.01 |
| O50016 | 1.00 | 0.07 | 0.14 | 1.00 | 0.12 | 0.00 | 0.50 | 0.33 | 0.07 | 0.03 | 0.00 | 0.16 |
| O64394 | 0.03 | 0.02 | 0.50 | 0.77 | 0.25 | 0.01 | 0.02 | 0.31 | 0.22 | 0.08 | 0.03 | 0.02 |
| O64894 | 0.08 | 0.09 | 0.36 | 0.20 | 0.08 | 0.10 | 0.00 | 0.60 | 0.04 | 1.00 | 0.12 | 0.14 |
| O64967 | 0.24 | 0.03 | 0.84 | 0.33 | 1.00 | 0.01 | 0.12 | 1.00 | 0.03 | 0.15 | 0.12 | 0.15 |
| O65351 | 0.27 | 1.00 | 0.25 | 0.20 | 0.25 | 0.42 | 0.04 | 0.40 | 0.50 | 0.04 | 0.20 | 0.13 |
| O65493 | 1.00 | 0.13 | 0.16 | 0.25 | 0.14 | 0.69 | 0.33 | 0.25 | 0.84 | 0.03 | 0.04 | 0.78 |
| O65735 | 0.08 | 0.04 | 0.50 | 0.77 | 0.02 | 0.04 | 0.02 | 0.21 | 0.22 | 0.09 | 0.03 | 0.08 |
| O65743 | 0.02 | 0.02 | 0.48 | 0.77 | 0.02 | 0.00 | 0.02 | 0.17 | 0.22 | 0.00 | 0.20 | 0.02 |
| O65837 | 0.05 | 0.01 | 0.85 | 0.36 | 0.67 | 0.01 | 0.05 | 0.31 | 0.05 | 0.08 | 0.12 | 0.05 |
| O80333 | 0.03 | 0.01 | 1.00 | 0.17 | 0.06 | 0.01 | 0.00 | 0.31 | 0.07 | 0.08 | 0.12 | 0.02 |

|        |      |      |      |      |      |      |      |      |      |      |      |      |
|--------|------|------|------|------|------|------|------|------|------|------|------|------|
| O80439 | 0.11 | 0.00 | 1.00 | 0.18 | 0.02 | 0.00 | 0.00 | 0.17 | 0.04 | 0.04 | 0.20 | 0.04 |
| O80458 | 0.24 | 0.04 | 0.67 | 0.50 | 1.00 | 0.01 | 0.12 | 0.26 | 0.50 | 0.04 | 0.05 | 0.15 |
| O80575 | 0.02 | 0.02 | 1.00 | 0.24 | 0.04 | 0.01 | 0.02 | 0.13 | 0.13 | 0.03 | 0.12 | 0.02 |
| O80725 | 1.00 | 0.21 | 0.44 | 0.50 | 0.20 | 0.04 | 0.12 | 0.28 | 0.75 | 0.06 | 0.03 | 0.33 |
| O80845 | 0.24 | 0.07 | 0.85 | 0.40 | 0.18 | 0.00 | 0.12 | 0.89 | 0.49 | 1.00 | 0.02 | 0.15 |
| O81223 | 1.00 | 0.05 | 0.27 | 0.77 | 0.20 | 0.08 | 0.08 | 0.25 | 0.84 | 0.03 | 0.02 | 0.50 |
| O81644 | 0.07 | 0.05 | 0.17 | 1.00 | 0.05 | 0.01 | 0.11 | 0.16 | 0.50 | 0.04 | 0.00 | 0.05 |
| O82067 | 0.24 | 0.07 | 0.14 | 0.25 | 0.18 | 0.00 | 0.21 | 1.00 | 0.04 | 0.03 | 0.00 | 0.16 |
| O82491 | 0.05 | 0.05 | 0.18 | 0.44 | 0.03 | 0.01 | 0.03 | 0.25 | 1.00 | 0.05 | 0.06 | 0.04 |
| O82499 | 0.05 | 0.04 | 1.00 | 0.44 | 0.03 | 0.02 | 0.03 | 0.20 | 0.20 | 0.04 | 0.33 | 0.04 |
| O82662 | 0.15 | 0.09 | 0.42 | 0.25 | 0.09 | 0.10 | 0.38 | 1.00 | 0.18 | 0.24 | 0.08 | 0.08 |
| O82663 | 0.24 | 0.65 | 0.34 | 0.25 | 0.12 | 0.17 | 0.50 | 1.00 | 0.09 | 0.40 | 0.03 | 0.14 |
| O82782 | 0.05 | 0.09 | 1.00 | 0.36 | 0.05 | 0.10 | 0.05 | 0.17 | 0.05 | 0.09 | 0.12 | 0.06 |
| O82796 | 0.20 | 0.17 | 1.00 | 0.38 | 0.15 | 0.12 | 0.08 | 0.50 | 0.60 | 0.08 | 0.12 | 0.23 |
| O82803 | 0.02 | 0.02 | 0.09 | 0.77 | 0.02 | 0.00 | 0.02 | 0.05 | 0.22 | 0.00 | 0.00 | 0.02 |
| O82804 | 0.25 | 0.01 | 0.19 | 0.57 | 0.22 | 0.06 | 0.25 | 0.19 | 1.00 | 0.00 | 0.06 | 0.22 |
| O99869 | 0.24 | 0.03 | 0.31 | 0.17 | 0.18 | 0.01 | 0.12 | 1.00 | 0.03 | 0.08 | 0.03 | 0.15 |
| P00693 | 0.15 | 0.55 | 0.38 | 0.38 | 0.15 | 1.00 | 0.08 | 0.18 | 0.33 | 0.09 | 0.02 | 0.23 |
| P02902 | 0.08 | 0.00 | 0.85 | 0.20 | 0.08 | 0.00 | 0.00 | 0.50 | 0.05 | 0.24 | 0.14 | 0.10 |
| P03938 | 0.01 | 0.00 | 0.85 | 0.02 | 0.01 | 0.00 | 0.00 | 0.09 | 0.02 | 0.01 | 0.12 | 0.01 |
| P04347 | 0.08 | 0.07 | 0.01 | 0.21 | 0.30 | 0.07 | 0.04 | 0.04 | 0.03 | 0.01 | 0.00 | 0.70 |
| P04706 | 0.24 | 0.07 | 0.10 | 0.21 | 0.21 | 0.07 | 0.08 | 0.25 | 0.03 | 0.03 | 0.00 | 1.00 |
| P04709 | 0.35 | 0.04 | 0.23 | 0.12 | 0.18 | 0.00 | 0.12 | 1.00 | 0.03 | 0.03 | 0.00 | 0.26 |
| P04711 | 0.11 | 0.09 | 0.87 | 1.00 | 0.02 | 0.10 | 0.02 | 0.59 | 0.22 | 0.24 | 0.25 | 0.08 |
| P05117 | 0.50 | 1.00 | 0.32 | 0.20 | 0.04 | 1.00 | 0.10 | 0.13 | 0.15 | 0.09 | 0.01 | 0.21 |
| P05314 | 0.07 | 0.02 | 1.00 | 0.24 | 0.13 | 0.01 | 0.01 | 0.37 | 0.18 | 0.50 | 0.12 | 0.05 |
| P05414 | 0.05 | 0.04 | 0.38 | 0.40 | 0.20 | 0.04 | 0.00 | 0.31 | 0.03 | 1.00 | 0.10 | 0.05 |
| P05466 | 0.05 | 0.04 | 1.00 | 0.44 | 0.33 | 0.04 | 0.03 | 0.17 | 0.20 | 0.09 | 0.12 | 0.05 |
| P05499 | 0.24 | 0.04 | 0.14 | 0.12 | 0.18 | 0.00 | 0.12 | 1.00 | 0.03 | 0.03 | 0.00 | 0.40 |
| P05502 | 0.52 | 0.05 | 0.31 | 0.25 | 0.33 | 0.01 | 0.12 | 1.00 | 0.18 | 0.13 | 0.03 | 0.17 |
| P05716 | 0.02 | 0.01 | 0.48 | 0.20 | 0.01 | 0.00 | 0.00 | 0.89 | 0.04 | 0.02 | 0.21 | 0.01 |
| P05720 | 0.01 | 0.00 | 0.85 | 0.02 | 0.01 | 0.00 | 0.00 | 0.09 | 0.02 | 0.01 | 0.12 | 0.01 |
| P05721 | 0.01 | 0.00 | 0.85 | 0.02 | 0.01 | 0.00 | 0.00 | 0.09 | 0.02 | 0.01 | 0.12 | 0.01 |
| P05722 | 0.01 | 0.00 | 0.85 | 0.02 | 0.01 | 0.00 | 0.00 | 0.09 | 0.02 | 0.01 | 0.12 | 0.01 |
| P05723 | 0.01 | 0.00 | 0.85 | 0.02 | 0.01 | 0.00 | 0.00 | 0.09 | 0.02 | 0.01 | 0.12 | 0.01 |
| P05724 | 0.01 | 0.00 | 0.85 | 0.02 | 0.01 | 0.00 | 0.00 | 0.09 | 0.02 | 0.01 | 0.12 | 0.01 |
| P05725 | 0.13 | 0.13 | 1.00 | 0.24 | 0.04 | 0.14 | 0.03 | 0.18 | 0.43 | 0.02 | 0.12 | 0.12 |
| P06258 | 0.24 | 0.04 | 0.85 | 0.17 | 0.18 | 0.01 | 0.12 | 0.69 | 0.04 | 0.08 | 0.12 | 0.16 |
| P06673 | 0.08 | 0.07 | 0.01 | 0.21 | 0.30 | 0.07 | 0.04 | 0.04 | 0.03 | 0.01 | 0.00 | 0.70 |
| P07052 | 0.12 | 0.13 | 0.02 | 0.38 | 0.09 | 0.25 | 0.04 | 0.04 | 0.24 | 0.01 | 0.00 | 0.62 |
| P07053 | 0.12 | 0.55 | 0.02 | 0.38 | 0.09 | 0.42 | 0.04 | 0.04 | 0.24 | 0.01 | 0.00 | 0.62 |
| P07505 | 0.06 | 0.02 | 0.85 | 0.35 | 0.06 | 0.20 | 0.01 | 0.31 | 0.18 | 0.12 | 0.12 | 0.05 |
| P07513 | 0.24 | 0.04 | 0.14 | 0.12 | 0.18 | 0.00 | 0.12 | 1.00 | 0.03 | 0.03 | 0.00 | 0.28 |
| P08031 | 0.08 | 0.07 | 0.01 | 0.21 | 0.30 | 0.07 | 0.04 | 0.04 | 0.03 | 0.01 | 0.00 | 0.70 |
| P08216 | 0.05 | 0.04 | 0.41 | 0.29 | 0.04 | 0.04 | 0.02 | 0.59 | 0.13 | 1.00 | 0.05 | 0.05 |
| P08474 | 0.08 | 0.01 | 0.88 | 0.25 | 0.40 | 0.01 | 0.00 | 0.31 | 0.07 | 0.30 | 0.33 | 0.08 |

|        |      |      |      |      |      |      |      |      |      |      |      |      |
|--------|------|------|------|------|------|------|------|------|------|------|------|------|
| P08688 | 0.15 | 0.07 | 0.27 | 0.77 | 0.21 | 0.08 | 0.08 | 0.18 | 0.22 | 0.04 | 0.02 | 0.64 |
| P08740 | 0.24 | 0.03 | 0.31 | 0.17 | 0.18 | 0.01 | 0.12 | 1.00 | 0.03 | 0.08 | 0.03 | 0.15 |
| P08889 | 0.01 | 0.00 | 0.85 | 0.02 | 0.01 | 0.00 | 0.00 | 0.09 | 0.02 | 0.01 | 0.12 | 0.01 |
| P08927 | 0.08 | 0.02 | 0.85 | 0.77 | 0.33 | 0.00 | 0.02 | 0.50 | 0.22 | 0.01 | 0.12 | 0.04 |
| P09233 | 0.25 | 0.13 | 0.50 | 0.50 | 0.13 | 0.20 | 0.05 | 0.95 | 0.49 | 0.20 | 0.03 | 0.06 |
| P09753 | 0.01 | 0.07 | 0.85 | 0.22 | 0.01 | 0.13 | 0.00 | 0.17 | 0.43 | 0.01 | 0.12 | 0.01 |
| P09754 | 0.01 | 0.00 | 0.85 | 0.02 | 0.01 | 0.00 | 0.00 | 0.09 | 0.02 | 0.01 | 0.12 | 0.01 |
| P09856 | 0.07 | 0.02 | 0.85 | 0.50 | 0.25 | 0.01 | 0.05 | 0.31 | 0.49 | 0.08 | 0.12 | 0.04 |
| P0C306 | 0.01 | 0.00 | 0.85 | 0.02 | 0.01 | 0.00 | 0.00 | 0.09 | 0.02 | 0.01 | 0.12 | 0.01 |
| P0C308 | 0.01 | 0.00 | 0.85 | 0.02 | 0.01 | 0.00 | 0.00 | 0.09 | 0.02 | 0.01 | 0.12 | 0.01 |
| P0C310 | 0.01 | 0.00 | 0.85 | 0.02 | 0.01 | 0.00 | 0.00 | 0.09 | 0.02 | 0.01 | 0.12 | 0.01 |
| P0C452 | 0.01 | 0.01 | 0.85 | 0.18 | 0.01 | 0.00 | 0.00 | 0.20 | 0.02 | 0.01 | 0.27 | 0.01 |
| P0C471 | 0.01 | 0.00 | 0.85 | 0.02 | 0.01 | 0.00 | 0.00 | 0.09 | 0.02 | 0.01 | 0.12 | 0.01 |
| P0C586 | 0.02 | 0.14 | 1.00 | 0.29 | 0.04 | 0.01 | 0.29 | 0.13 | 0.14 | 0.03 | 0.12 | 0.07 |
| P10329 | 0.24 | 0.03 | 0.31 | 0.17 | 0.18 | 0.01 | 0.12 | 1.00 | 0.03 | 0.08 | 0.03 | 0.15 |
| P11090 | 0.10 | 0.07 | 0.00 | 0.21 | 1.00 | 0.07 | 0.04 | 0.02 | 0.02 | 0.00 | 0.00 | 0.64 |
| P11673 | 0.01 | 0.00 | 0.85 | 0.02 | 0.01 | 0.00 | 0.00 | 0.09 | 0.02 | 0.01 | 0.12 | 0.01 |
| P11827 | 0.08 | 0.07 | 0.01 | 0.21 | 0.30 | 0.07 | 0.04 | 0.04 | 0.03 | 0.01 | 0.00 | 1.00 |
| P12347 | 0.01 | 0.00 | 0.85 | 0.25 | 0.01 | 0.00 | 0.00 | 0.09 | 0.88 | 0.01 | 0.12 | 0.01 |
| P12365 | 0.25 | 0.02 | 0.31 | 1.00 | 0.13 | 0.01 | 0.06 | 0.67 | 0.50 | 0.84 | 0.03 | 0.05 |
| P12412 | 0.14 | 0.13 | 0.16 | 0.17 | 1.00 | 0.12 | 0.14 | 0.20 | 0.29 | 0.01 | 0.04 | 0.70 |
| P12629 | 0.01 | 0.01 | 0.85 | 0.18 | 0.01 | 0.00 | 0.00 | 0.20 | 0.02 | 0.01 | 0.21 | 0.01 |
| P12670 | 0.14 | 0.13 | 0.09 | 0.77 | 0.29 | 0.25 | 0.02 | 0.05 | 0.24 | 0.00 | 0.00 | 0.67 |
| P12783 | 0.08 | 0.02 | 0.50 | 0.77 | 0.04 | 0.01 | 0.02 | 0.28 | 0.22 | 0.03 | 0.05 | 0.04 |
| P12859 | 0.03 | 0.01 | 1.00 | 0.50 | 0.11 | 0.01 | 0.00 | 0.31 | 0.02 | 0.17 | 0.13 | 0.02 |
| P12959 | 0.01 | 0.01 | 0.19 | 0.27 | 0.03 | 0.00 | 0.00 | 0.09 | 0.87 | 0.00 | 0.06 | 0.01 |
| P13443 | 0.05 | 0.09 | 0.44 | 0.17 | 0.08 | 0.10 | 0.00 | 0.31 | 0.01 | 1.00 | 0.10 | 0.06 |
| P13564 | 0.25 | 0.04 | 0.85 | 0.50 | 0.04 | 0.04 | 0.01 | 0.42 | 0.10 | 0.09 | 0.12 | 0.05 |
| P13983 | 0.19 | 1.00 | 0.05 | 0.20 | 0.02 | 0.42 | 0.10 | 0.11 | 0.02 | 0.00 | 0.00 | 0.06 |
| P14624 | 0.02 | 0.02 | 0.09 | 0.77 | 0.02 | 0.00 | 0.02 | 0.05 | 0.84 | 0.00 | 0.00 | 0.02 |
| P14713 | 0.50 | 0.07 | 0.87 | 1.00 | 0.50 | 0.06 | 0.17 | 0.20 | 1.00 | 0.13 | 0.06 | 0.50 |
| P14918 | 0.19 | 1.00 | 0.05 | 0.20 | 0.02 | 0.42 | 0.10 | 0.11 | 0.02 | 0.00 | 0.00 | 0.06 |
| P15290 | 0.11 | 1.00 | 0.31 | 1.00 | 0.21 | 0.42 | 0.02 | 0.31 | 0.22 | 0.08 | 0.03 | 0.64 |
| P15478 | 0.25 | 0.13 | 0.32 | 0.50 | 0.21 | 0.12 | 0.04 | 0.13 | 0.24 | 0.15 | 0.08 | 0.64 |
| P15494 | 0.12 | 0.13 | 0.09 | 0.77 | 0.05 | 0.25 | 0.02 | 0.05 | 0.24 | 0.00 | 0.00 | 0.38 |
| P15688 | 0.24 | 0.03 | 0.31 | 0.17 | 0.18 | 0.01 | 0.12 | 1.00 | 0.03 | 0.08 | 0.03 | 0.15 |
| P15797 | 0.25 | 0.33 | 0.32 | 0.26 | 0.09 | 0.38 | 0.04 | 0.13 | 0.24 | 0.09 | 0.01 | 0.62 |
| P16096 | 0.33 | 0.04 | 1.00 | 0.50 | 0.01 | 0.04 | 0.00 | 0.21 | 0.33 | 0.09 | 0.12 | 0.08 |
| P16181 | 0.29 | 0.65 | 0.54 | 1.00 | 0.12 | 0.17 | 0.08 | 0.40 | 0.22 | 0.04 | 0.31 | 0.10 |
| P16867 | 0.15 | 0.01 | 0.19 | 0.31 | 0.02 | 0.00 | 0.00 | 0.13 | 1.00 | 0.00 | 0.05 | 0.01 |
| P17048 | 0.08 | 0.07 | 0.01 | 0.21 | 0.30 | 0.07 | 0.04 | 0.04 | 0.03 | 0.01 | 0.00 | 0.70 |
| P17597 | 0.07 | 0.04 | 1.00 | 0.26 | 0.07 | 0.07 | 0.02 | 0.50 | 0.18 | 0.14 | 0.12 | 0.14 |
| P17990 | 0.08 | 0.07 | 0.09 | 0.77 | 0.21 | 0.07 | 0.04 | 0.05 | 0.22 | 0.01 | 0.00 | 0.64 |
| P18123 | 0.25 | 0.02 | 0.33 | 0.43 | 0.13 | 0.01 | 0.06 | 0.89 | 0.57 | 0.40 | 0.03 | 0.05 |
| P18417 | 0.08 | 0.03 | 0.50 | 0.50 | 0.09 | 0.04 | 0.04 | 0.10 | 0.03 | 0.06 | 0.03 | 1.00 |
| P18823 | 0.24 | 0.03 | 1.00 | 0.24 | 0.12 | 0.01 | 0.08 | 0.42 | 0.18 | 0.24 | 0.50 | 0.10 |

|        |      |      |      |      |      |      |      |      |      |      |      |      |
|--------|------|------|------|------|------|------|------|------|------|------|------|------|
| P19171 | 0.14 | 0.40 | 0.32 | 0.60 | 0.29 | 0.38 | 0.07 | 0.50 | 0.24 | 0.09 | 0.01 | 0.67 |
| P19172 | 0.17 | 0.55 | 0.33 | 0.25 | 0.33 | 1.00 | 0.06 | 0.33 | 0.50 | 0.14 | 0.01 | 0.50 |
| P19173 | 0.24 | 0.03 | 0.10 | 0.12 | 0.18 | 0.00 | 0.12 | 1.00 | 0.03 | 0.03 | 0.00 | 0.15 |
| P19587 | 0.02 | 0.02 | 0.85 | 0.24 | 0.04 | 0.01 | 0.02 | 0.17 | 0.70 | 0.03 | 0.31 | 0.02 |
| P19593 | 0.02 | 0.07 | 1.00 | 0.24 | 0.04 | 0.13 | 0.02 | 0.17 | 0.43 | 0.03 | 0.28 | 0.02 |
| P19595 | 0.05 | 0.09 | 0.61 | 1.00 | 0.04 | 0.10 | 0.02 | 0.13 | 0.22 | 0.09 | 0.28 | 0.06 |
| P19825 | 0.12 | 0.13 | 0.02 | 0.83 | 0.09 | 0.25 | 0.33 | 0.04 | 0.24 | 0.01 | 0.00 | 0.62 |
| P20075 | 0.11 | 0.65 | 0.09 | 0.77 | 0.02 | 0.42 | 0.02 | 0.11 | 0.22 | 0.00 | 0.00 | 0.06 |
| P20115 | 0.15 | 0.65 | 0.85 | 0.25 | 0.09 | 0.17 | 0.38 | 1.00 | 0.32 | 0.33 | 0.05 | 0.08 |
| P22178 | 0.04 | 0.02 | 0.85 | 0.50 | 0.06 | 0.01 | 0.01 | 0.38 | 0.18 | 0.13 | 0.12 | 0.05 |
| P22738 | 0.24 | 0.03 | 0.48 | 1.00 | 0.12 | 0.00 | 0.08 | 0.25 | 0.22 | 0.03 | 0.21 | 0.10 |
| P22778 | 0.24 | 0.04 | 0.14 | 0.12 | 0.12 | 0.00 | 0.10 | 1.00 | 0.03 | 0.03 | 0.00 | 0.28 |
| P22895 | 0.33 | 0.13 | 0.16 | 0.17 | 0.14 | 0.69 | 0.33 | 0.20 | 0.29 | 0.01 | 0.04 | 0.62 |
| P23137 | 0.19 | 0.76 | 0.05 | 0.38 | 0.05 | 0.42 | 0.10 | 0.11 | 0.24 | 0.00 | 0.00 | 0.38 |
| P23326 | 0.01 | 0.01 | 0.85 | 0.20 | 0.01 | 0.00 | 0.00 | 0.20 | 0.04 | 0.01 | 0.21 | 0.01 |
| P23408 | 0.01 | 0.01 | 0.85 | 0.20 | 0.01 | 0.02 | 0.00 | 0.20 | 0.08 | 0.01 | 0.31 | 0.01 |
| P23472 | 0.17 | 0.40 | 0.38 | 0.20 | 0.09 | 0.50 | 0.04 | 0.17 | 0.15 | 0.09 | 0.01 | 0.62 |
| P24226 | 0.05 | 0.09 | 1.00 | 0.24 | 0.06 | 0.10 | 0.01 | 0.44 | 0.32 | 0.09 | 0.12 | 0.06 |
| P24493 | 0.08 | 0.09 | 1.00 | 0.24 | 0.04 | 0.10 | 0.01 | 0.25 | 0.18 | 0.09 | 0.12 | 0.08 |
| P24613 | 0.01 | 0.01 | 0.85 | 0.20 | 0.01 | 0.02 | 0.00 | 0.20 | 0.08 | 0.01 | 0.31 | 0.01 |
| P24632 | 0.02 | 0.02 | 0.09 | 0.77 | 0.02 | 0.00 | 0.02 | 0.05 | 0.22 | 0.00 | 0.00 | 0.02 |
| P24846 | 0.08 | 0.09 | 1.00 | 0.22 | 0.02 | 0.10 | 0.00 | 0.17 | 0.03 | 0.09 | 0.12 | 0.08 |
| P25076 | 0.24 | 0.03 | 0.31 | 0.24 | 0.18 | 0.01 | 0.12 | 1.00 | 0.18 | 0.13 | 0.03 | 0.15 |
| P25141 | 0.04 | 0.03 | 0.31 | 1.00 | 0.06 | 0.01 | 0.02 | 0.44 | 0.32 | 0.08 | 0.03 | 0.05 |
| P25209 | 0.15 | 0.01 | 0.19 | 0.31 | 0.03 | 0.00 | 0.00 | 0.09 | 0.87 | 0.00 | 0.06 | 0.01 |
| P25306 | 0.11 | 0.09 | 1.00 | 0.22 | 0.02 | 0.10 | 0.00 | 0.31 | 0.03 | 0.09 | 0.12 | 0.08 |
| P25699 | 0.33 | 0.02 | 0.85 | 0.24 | 0.06 | 0.01 | 0.01 | 0.31 | 0.18 | 0.08 | 0.50 | 0.05 |
| P25848 | 0.52 | 0.05 | 0.46 | 0.50 | 0.25 | 0.01 | 0.08 | 0.28 | 0.85 | 0.03 | 0.19 | 0.10 |
| P25851 | 0.13 | 0.33 | 1.00 | 0.75 | 0.06 | 0.37 | 0.03 | 0.20 | 0.50 | 0.06 | 0.13 | 0.20 |
| P25873 | 0.11 | 0.01 | 1.00 | 0.20 | 0.02 | 0.00 | 0.00 | 0.20 | 0.17 | 0.06 | 0.27 | 0.04 |
| P25890 | 0.24 | 0.02 | 0.31 | 0.40 | 0.13 | 0.01 | 0.01 | 0.47 | 0.18 | 0.84 | 0.03 | 0.05 |
| P25892 | 0.13 | 0.50 | 0.14 | 0.77 | 0.05 | 0.12 | 0.03 | 0.09 | 0.24 | 0.00 | 0.01 | 0.17 |
| P25998 | 0.02 | 0.02 | 0.48 | 0.77 | 0.02 | 0.00 | 0.02 | 0.20 | 0.22 | 0.01 | 0.21 | 0.02 |
| P26301 | 0.08 | 0.02 | 0.61 | 1.00 | 0.04 | 0.01 | 0.02 | 0.21 | 0.22 | 0.06 | 0.04 | 0.08 |
| P26302 | 0.09 | 0.18 | 1.00 | 0.24 | 0.04 | 0.18 | 0.02 | 0.28 | 0.13 | 0.09 | 0.13 | 0.11 |
| P26307 | 0.02 | 0.20 | 0.19 | 0.77 | 0.20 | 0.00 | 0.20 | 0.09 | 0.85 | 0.00 | 0.06 | 0.20 |
| P26356 | 0.01 | 0.01 | 0.19 | 0.24 | 0.03 | 0.00 | 0.00 | 0.09 | 1.00 | 0.00 | 0.06 | 0.01 |
| P26360 | 0.24 | 0.04 | 0.14 | 0.12 | 0.12 | 0.00 | 0.10 | 1.00 | 0.03 | 0.03 | 0.00 | 0.28 |
| P26587 | 0.50 | 0.04 | 0.23 | 0.50 | 0.50 | 0.04 | 0.17 | 0.27 | 0.03 | 0.04 | 0.00 | 1.00 |
| P26792 | 0.17 | 0.65 | 0.32 | 0.20 | 0.06 | 0.42 | 0.03 | 0.13 | 0.15 | 0.09 | 0.01 | 0.50 |
| P26851 | 0.24 | 0.03 | 0.50 | 0.17 | 0.18 | 0.01 | 0.12 | 1.00 | 0.03 | 0.08 | 0.03 | 0.15 |
| P26854 | 0.24 | 0.04 | 0.35 | 0.20 | 0.12 | 0.00 | 0.10 | 1.00 | 0.10 | 0.03 | 0.03 | 0.28 |
| P26863 | 0.02 | 0.01 | 0.51 | 0.18 | 0.01 | 0.02 | 0.00 | 0.89 | 0.08 | 0.02 | 0.21 | 0.01 |
| P26867 | 0.02 | 0.01 | 0.54 | 0.18 | 0.01 | 0.02 | 0.00 | 0.89 | 0.08 | 0.02 | 0.31 | 0.01 |
| P26868 | 0.02 | 0.01 | 0.48 | 0.18 | 0.01 | 0.00 | 0.00 | 0.89 | 0.02 | 0.02 | 0.21 | 0.01 |
| P26969 | 0.05 | 0.04 | 0.38 | 0.20 | 0.06 | 0.04 | 0.00 | 1.00 | 0.03 | 0.09 | 0.03 | 0.05 |

|        |      |      |      |      |      |      |      |      |      |      |      |      |
|--------|------|------|------|------|------|------|------|------|------|------|------|------|
| P27058 | 0.02 | 0.02 | 0.09 | 1.00 | 0.02 | 0.00 | 0.02 | 0.05 | 0.22 | 0.00 | 0.00 | 0.02 |
| P27068 | 0.01 | 0.01 | 0.84 | 0.20 | 0.00 | 0.00 | 0.00 | 0.26 | 0.04 | 0.01 | 0.26 | 0.00 |
| P27168 | 0.25 | 0.05 | 0.31 | 0.24 | 0.18 | 0.01 | 0.12 | 1.00 | 0.18 | 0.08 | 0.03 | 0.15 |
| P27456 | 0.07 | 0.01 | 0.85 | 0.50 | 0.11 | 0.07 | 0.00 | 0.89 | 0.10 | 0.14 | 0.12 | 0.14 |
| P27608 | 0.05 | 0.04 | 1.00 | 0.24 | 0.04 | 0.04 | 0.02 | 0.17 | 0.13 | 0.09 | 0.12 | 0.05 |
| P27684 | 0.01 | 0.01 | 0.85 | 0.18 | 0.01 | 0.02 | 0.00 | 0.17 | 0.08 | 0.01 | 0.31 | 0.01 |
| P27793 | 0.08 | 0.00 | 1.00 | 0.22 | 0.01 | 0.00 | 0.00 | 0.09 | 0.03 | 0.06 | 0.12 | 0.08 |
| P27927 | 0.02 | 0.01 | 0.54 | 0.20 | 0.01 | 0.00 | 0.00 | 0.89 | 0.04 | 0.02 | 0.31 | 0.01 |
| P28011 | 0.11 | 0.04 | 0.56 | 0.77 | 0.04 | 0.04 | 0.02 | 0.33 | 0.22 | 0.09 | 0.05 | 0.10 |
| P28493 | 0.50 | 0.65 | 0.15 | 0.38 | 0.09 | 1.00 | 0.04 | 0.50 | 0.50 | 0.04 | 0.00 | 0.62 |
| P28643 | 0.08 | 0.01 | 0.85 | 0.20 | 0.08 | 0.01 | 0.00 | 0.31 | 0.05 | 0.24 | 1.00 | 0.10 |
| P28645 | 0.08 | 0.02 | 1.00 | 0.24 | 0.08 | 0.01 | 0.01 | 0.31 | 0.18 | 0.24 | 1.00 | 0.10 |
| P28759 | 0.04 | 0.02 | 0.85 | 0.33 | 0.06 | 0.20 | 0.01 | 0.31 | 0.18 | 0.08 | 0.12 | 0.05 |
| P28769 | 0.08 | 0.04 | 0.35 | 1.00 | 0.40 | 0.01 | 0.03 | 0.40 | 0.22 | 0.04 | 0.03 | 0.04 |
| P28996 | 0.08 | 0.20 | 0.46 | 0.77 | 0.03 | 0.00 | 0.09 | 0.22 | 0.22 | 0.01 | 0.20 | 0.03 |
| P29060 | 0.17 | 0.65 | 0.32 | 0.20 | 0.06 | 0.42 | 0.03 | 0.13 | 0.15 | 0.09 | 0.01 | 0.33 |
| P29102 | 0.04 | 0.02 | 1.00 | 0.77 | 0.08 | 0.01 | 0.02 | 0.31 | 0.22 | 0.15 | 0.12 | 0.05 |
| P29333 | 0.05 | 0.02 | 0.45 | 1.00 | 0.05 | 0.00 | 0.05 | 0.21 | 0.22 | 0.05 | 0.00 | 0.05 |
| P29344 | 0.01 | 0.01 | 0.85 | 0.22 | 0.01 | 0.02 | 0.00 | 0.20 | 0.43 | 0.01 | 0.21 | 0.01 |
| P29463 | 0.31 | 0.04 | 0.85 | 0.12 | 0.18 | 0.00 | 0.12 | 0.33 | 0.03 | 0.03 | 0.12 | 0.23 |
| P30060 | 0.01 | 0.01 | 0.84 | 0.20 | 0.00 | 0.02 | 0.00 | 0.26 | 0.08 | 0.01 | 0.31 | 0.00 |
| P30061 | 0.01 | 0.01 | 0.84 | 0.20 | 0.00 | 0.02 | 0.00 | 0.20 | 0.08 | 0.01 | 0.31 | 0.00 |
| P30067 | 0.01 | 0.01 | 0.84 | 0.20 | 0.00 | 0.02 | 0.00 | 0.20 | 0.08 | 0.01 | 0.31 | 0.00 |
| P30068 | 0.01 | 0.01 | 0.84 | 0.20 | 0.00 | 0.00 | 0.00 | 0.20 | 0.04 | 0.01 | 0.21 | 0.00 |
| P30070 | 0.00 | 0.01 | 0.84 | 0.18 | 0.00 | 0.02 | 0.00 | 0.20 | 0.08 | 0.00 | 0.33 | 0.00 |
| P30222 | 0.01 | 0.00 | 0.85 | 0.02 | 0.01 | 0.00 | 0.00 | 0.09 | 0.02 | 0.01 | 0.12 | 0.01 |
| P30401 | 0.08 | 0.02 | 0.88 | 0.26 | 0.40 | 0.01 | 0.01 | 0.31 | 0.18 | 0.30 | 0.33 | 0.08 |
| P30524 | 0.08 | 0.09 | 1.00 | 0.30 | 0.04 | 0.10 | 0.02 | 0.28 | 0.13 | 0.09 | 0.28 | 0.10 |
| P30792 | 0.05 | 0.13 | 0.45 | 1.00 | 0.05 | 0.13 | 0.05 | 0.21 | 0.22 | 0.09 | 0.02 | 0.06 |
| P30924 | 0.17 | 0.33 | 1.00 | 0.33 | 0.06 | 0.33 | 0.29 | 0.17 | 0.33 | 0.09 | 0.12 | 0.22 |
| P30941 | 0.08 | 0.03 | 0.33 | 0.13 | 0.09 | 0.50 | 0.04 | 0.04 | 0.25 | 0.01 | 0.00 | 0.62 |
| P30956 | 0.01 | 0.01 | 0.85 | 0.20 | 0.01 | 0.00 | 0.00 | 0.20 | 0.04 | 0.01 | 0.21 | 0.01 |
| P30986 | 0.17 | 0.04 | 0.38 | 1.00 | 0.17 | 0.17 | 0.33 | 0.31 | 0.03 | 0.14 | 0.03 | 0.50 |
| P31166 | 0.02 | 0.14 | 0.85 | 1.00 | 0.40 | 0.20 | 0.29 | 0.13 | 0.22 | 0.03 | 0.12 | 0.20 |
| P31178 | 0.19 | 1.00 | 0.27 | 0.24 | 0.10 | 0.42 | 0.10 | 0.50 | 0.32 | 0.02 | 0.04 | 0.13 |
| P31414 | 1.00 | 0.13 | 0.85 | 0.44 | 0.20 | 0.12 | 0.50 | 0.89 | 0.53 | 0.04 | 0.02 | 1.00 |
| P31541 | 0.08 | 0.02 | 0.85 | 0.33 | 0.04 | 0.00 | 0.01 | 0.28 | 0.10 | 0.01 | 0.12 | 0.04 |
| P31562 | 0.08 | 0.02 | 0.84 | 0.24 | 0.08 | 0.01 | 0.01 | 0.42 | 0.18 | 0.24 | 0.50 | 0.10 |
| P32034 | 0.00 | 0.00 | 0.84 | 0.00 | 0.00 | 0.00 | 0.00 | 0.06 | 0.00 | 0.00 | 0.12 | 0.00 |
| P32035 | 0.00 | 0.00 | 0.84 | 0.00 | 0.00 | 0.00 | 0.00 | 0.06 | 0.00 | 0.00 | 0.12 | 0.00 |
| P32746 | 0.24 | 0.04 | 0.50 | 0.77 | 0.18 | 0.04 | 0.12 | 1.00 | 0.22 | 0.40 | 0.03 | 0.15 |
| P32761 | 0.13 | 0.13 | 1.00 | 0.24 | 0.04 | 0.14 | 0.03 | 0.18 | 0.68 | 0.02 | 0.12 | 0.12 |
| P33154 | 0.33 | 0.65 | 0.50 | 0.38 | 0.17 | 1.00 | 0.02 | 0.11 | 0.53 | 0.04 | 0.00 | 0.38 |
| P33432 | 0.24 | 0.55 | 0.24 | 0.26 | 0.12 | 0.69 | 0.08 | 0.25 | 0.29 | 0.03 | 0.00 | 0.17 |
| P33444 | 0.02 | 0.02 | 0.48 | 0.77 | 0.02 | 0.00 | 0.02 | 0.20 | 0.22 | 0.01 | 0.21 | 0.02 |
| P33488 | 0.33 | 0.03 | 0.27 | 0.33 | 1.00 | 0.01 | 0.04 | 0.44 | 0.54 | 0.02 | 0.02 | 0.08 |

|        |      |      |      |      |      |      |      |      |      |      |      |      |
|--------|------|------|------|------|------|------|------|------|------|------|------|------|
| P34802 | 0.07 | 0.08 | 1.00 | 0.44 | 0.33 | 0.01 | 0.05 | 0.50 | 0.49 | 0.08 | 0.12 | 0.08 |
| P34811 | 0.08 | 0.20 | 0.85 | 0.38 | 0.03 | 0.00 | 0.09 | 0.22 | 0.10 | 0.01 | 0.20 | 0.03 |
| P34899 | 0.05 | 0.04 | 0.50 | 0.24 | 0.04 | 0.04 | 0.02 | 1.00 | 0.13 | 0.09 | 0.05 | 0.05 |
| P34923 | 0.03 | 0.02 | 0.56 | 1.00 | 0.11 | 0.01 | 0.02 | 0.31 | 0.22 | 0.17 | 0.06 | 0.02 |
| P34937 | 0.05 | 0.09 | 0.50 | 0.77 | 0.05 | 0.10 | 0.05 | 0.21 | 0.22 | 0.09 | 0.00 | 0.06 |
| P34944 | 0.24 | 0.03 | 0.50 | 0.17 | 0.12 | 0.01 | 0.08 | 1.00 | 0.03 | 0.08 | 0.03 | 0.10 |
| P35006 | 0.01 | 0.00 | 0.85 | 0.02 | 0.01 | 0.00 | 0.00 | 0.09 | 0.02 | 0.01 | 0.12 | 0.01 |
| P35016 | 0.10 | 0.02 | 0.35 | 0.33 | 1.00 | 0.00 | 0.04 | 0.40 | 0.33 | 0.01 | 0.03 | 0.08 |
| P35334 | 0.24 | 0.65 | 0.10 | 0.26 | 0.12 | 0.42 | 0.08 | 0.25 | 0.24 | 0.03 | 0.00 | 0.17 |
| P35402 | 0.24 | 0.11 | 0.14 | 0.25 | 1.00 | 0.00 | 0.56 | 0.32 | 0.04 | 0.03 | 0.00 | 0.16 |
| P35480 | 0.08 | 0.02 | 0.50 | 0.77 | 0.33 | 0.00 | 0.02 | 0.89 | 0.22 | 0.02 | 0.03 | 0.04 |
| P36211 | 0.01 | 0.01 | 1.00 | 0.20 | 0.01 | 0.00 | 0.00 | 0.20 | 0.04 | 0.01 | 0.21 | 0.01 |
| P36428 | 0.08 | 0.08 | 0.85 | 1.00 | 0.08 | 0.08 | 0.03 | 1.00 | 0.43 | 0.04 | 0.21 | 0.08 |
| P36437 | 0.08 | 0.02 | 1.00 | 0.24 | 0.06 | 0.01 | 0.01 | 0.37 | 0.18 | 0.08 | 0.12 | 0.05 |
| P36443 | 0.01 | 0.00 | 0.85 | 0.02 | 0.01 | 0.00 | 0.00 | 0.09 | 0.02 | 0.01 | 0.12 | 0.01 |
| P37218 | 0.01 | 0.01 | 0.19 | 0.24 | 0.02 | 0.00 | 0.00 | 0.13 | 1.00 | 0.00 | 0.05 | 0.01 |
| P37221 | 0.04 | 0.02 | 0.44 | 0.33 | 0.06 | 0.01 | 0.01 | 0.95 | 0.18 | 0.13 | 0.06 | 0.05 |
| P37223 | 0.04 | 0.02 | 0.50 | 0.77 | 0.06 | 0.01 | 0.02 | 0.38 | 0.22 | 0.13 | 0.06 | 0.05 |
| P37392 | 0.08 | 0.09 | 0.50 | 1.00 | 0.05 | 0.00 | 0.13 | 0.22 | 0.67 | 0.01 | 0.09 | 0.13 |
| P37825 | 0.01 | 0.00 | 0.85 | 0.02 | 0.01 | 0.00 | 0.00 | 0.09 | 0.02 | 0.01 | 0.12 | 0.01 |
| P38365 | 0.03 | 0.01 | 1.00 | 0.17 | 0.06 | 0.01 | 0.00 | 0.31 | 0.13 | 0.08 | 0.12 | 0.02 |
| P38389 | 0.24 | 0.11 | 0.14 | 0.50 | 1.00 | 0.00 | 0.56 | 0.75 | 0.04 | 0.03 | 0.00 | 0.25 |
| P38414 | 0.08 | 0.02 | 0.60 | 0.77 | 0.08 | 0.01 | 0.02 | 0.31 | 0.22 | 0.43 | 0.14 | 0.10 |
| P38482 | 0.24 | 0.13 | 0.35 | 0.20 | 0.12 | 0.12 | 0.10 | 1.00 | 0.15 | 0.03 | 0.03 | 0.28 |
| P39697 | 0.08 | 0.02 | 0.51 | 0.75 | 0.03 | 0.02 | 0.01 | 0.89 | 0.43 | 0.02 | 0.26 | 0.03 |
| P40280 | 0.15 | 0.01 | 0.19 | 0.31 | 0.02 | 0.00 | 0.00 | 0.13 | 1.00 | 0.00 | 0.05 | 0.01 |
| P41127 | 0.52 | 0.65 | 0.48 | 1.00 | 0.12 | 0.17 | 0.38 | 0.40 | 0.60 | 0.06 | 0.21 | 0.41 |
| P41153 | 0.01 | 0.01 | 0.19 | 0.27 | 0.03 | 0.00 | 0.00 | 0.09 | 0.87 | 0.00 | 0.06 | 0.01 |
| P41347 | 0.11 | 0.02 | 1.00 | 0.24 | 0.06 | 0.01 | 0.01 | 0.64 | 0.18 | 0.08 | 0.12 | 0.05 |
| P42036 | 0.05 | 0.04 | 0.50 | 1.00 | 0.03 | 0.01 | 0.03 | 0.25 | 0.22 | 0.04 | 0.21 | 0.04 |
| P42043 | 0.24 | 0.03 | 0.92 | 0.22 | 0.12 | 0.00 | 0.08 | 0.89 | 0.06 | 0.12 | 0.12 | 0.10 |
| P42055 | 0.35 | 0.04 | 0.14 | 0.12 | 0.18 | 0.00 | 0.12 | 1.00 | 0.03 | 0.03 | 0.00 | 0.28 |
| P42379 | 0.13 | 0.20 | 1.00 | 0.17 | 0.25 | 0.13 | 0.04 | 0.40 | 0.31 | 0.02 | 0.20 | 0.13 |
| P42698 | 0.08 | 0.02 | 1.00 | 0.77 | 0.03 | 0.02 | 0.02 | 0.22 | 0.84 | 0.01 | 0.21 | 0.03 |
| P42732 | 0.11 | 0.04 | 0.88 | 0.44 | 0.03 | 0.02 | 0.03 | 0.50 | 0.43 | 0.04 | 0.31 | 0.04 |
| P42738 | 0.06 | 0.09 | 1.00 | 0.44 | 0.06 | 0.10 | 0.05 | 0.18 | 0.20 | 0.33 | 0.12 | 0.06 |
| P42744 | 0.31 | 0.04 | 0.44 | 0.44 | 0.15 | 0.07 | 0.13 | 0.22 | 1.00 | 0.06 | 0.03 | 0.08 |
| P42757 | 0.05 | 0.09 | 0.85 | 0.33 | 0.06 | 0.10 | 0.00 | 0.31 | 0.02 | 0.50 | 0.12 | 0.06 |
| P42774 | 0.07 | 0.02 | 0.19 | 0.77 | 0.03 | 0.00 | 0.05 | 0.09 | 1.00 | 0.02 | 0.06 | 0.04 |
| P42791 | 0.52 | 0.09 | 0.85 | 1.00 | 0.09 | 0.04 | 0.38 | 0.22 | 0.49 | 0.04 | 0.27 | 0.62 |
| P42798 | 0.52 | 0.65 | 0.48 | 1.00 | 0.12 | 0.17 | 0.38 | 0.89 | 0.25 | 0.04 | 0.21 | 0.41 |
| P42801 | 0.08 | 0.08 | 0.45 | 1.00 | 0.20 | 0.00 | 0.05 | 0.20 | 0.84 | 0.15 | 0.08 | 0.10 |
| P42804 | 0.24 | 0.03 | 1.00 | 0.33 | 0.12 | 0.01 | 0.08 | 0.33 | 0.49 | 0.08 | 0.12 | 0.10 |
| P42820 | 0.13 | 0.55 | 0.32 | 0.26 | 0.05 | 0.69 | 0.06 | 0.13 | 0.24 | 0.09 | 0.01 | 0.33 |
| P43254 | 0.50 | 0.07 | 0.41 | 1.00 | 0.22 | 0.01 | 0.05 | 0.44 | 1.00 | 0.13 | 0.05 | 0.22 |
| P43299 | 0.13 | 0.17 | 0.35 | 0.77 | 0.17 | 0.12 | 0.05 | 0.28 | 1.00 | 0.04 | 0.06 | 0.17 |

|        |      |      |      |      |      |      |      |      |      |      |      |      |
|--------|------|------|------|------|------|------|------|------|------|------|------|------|
| P43643 | 0.08 | 0.20 | 0.46 | 0.77 | 0.03 | 0.00 | 0.09 | 0.22 | 0.22 | 0.01 | 0.20 | 0.03 |
| P45432 | 0.15 | 0.08 | 0.42 | 1.00 | 0.11 | 0.04 | 0.05 | 0.33 | 1.00 | 0.08 | 0.00 | 0.08 |
| P45434 | 0.52 | 0.09 | 0.67 | 0.25 | 1.00 | 0.04 | 0.38 | 0.26 | 0.07 | 0.04 | 0.00 | 0.62 |
| P45951 | 0.08 | 0.20 | 0.85 | 0.40 | 0.13 | 0.14 | 0.01 | 0.20 | 1.00 | 0.06 | 0.19 | 0.20 |
| P46011 | 1.00 | 0.13 | 0.44 | 1.00 | 0.12 | 0.12 | 0.08 | 0.25 | 0.15 | 0.06 | 0.03 | 0.12 |
| P46032 | 0.33 | 0.09 | 0.23 | 0.25 | 0.18 | 0.04 | 0.38 | 0.32 | 0.04 | 0.04 | 0.00 | 1.00 |
| P46248 | 0.11 | 0.04 | 1.00 | 0.33 | 0.04 | 0.04 | 0.02 | 0.50 | 0.13 | 0.09 | 0.12 | 0.10 |
| P46269 | 0.25 | 0.03 | 0.31 | 0.17 | 0.12 | 0.01 | 0.08 | 1.00 | 0.03 | 0.08 | 0.03 | 0.13 |
| P46302 | 0.02 | 0.02 | 0.48 | 0.77 | 0.02 | 0.00 | 0.02 | 0.20 | 0.22 | 0.01 | 0.21 | 0.02 |
| P46307 | 0.01 | 0.01 | 0.85 | 0.18 | 0.01 | 0.02 | 0.00 | 0.26 | 0.08 | 0.01 | 0.26 | 0.01 |
| P46416 | 0.18 | 0.04 | 1.00 | 0.44 | 0.50 | 0.01 | 0.03 | 0.42 | 0.50 | 0.04 | 0.12 | 0.17 |
| P46422 | 0.52 | 0.33 | 0.88 | 0.77 | 1.00 | 0.37 | 0.08 | 0.50 | 0.54 | 0.17 | 0.05 | 0.62 |
| P46489 | 0.09 | 0.18 | 1.00 | 0.25 | 0.08 | 0.18 | 0.02 | 0.38 | 0.03 | 0.25 | 0.12 | 0.11 |
| P46643 | 0.11 | 0.08 | 0.56 | 0.33 | 0.08 | 0.08 | 0.02 | 0.95 | 0.13 | 0.09 | 0.05 | 0.10 |
| P46666 | 0.01 | 0.00 | 0.85 | 0.02 | 0.01 | 0.00 | 0.00 | 0.09 | 0.02 | 0.01 | 0.12 | 0.01 |
| P46741 | 0.02 | 0.01 | 0.48 | 0.20 | 0.01 | 0.00 | 0.00 | 0.89 | 0.04 | 0.02 | 0.26 | 0.01 |
| P46743 | 0.02 | 0.01 | 0.54 | 0.20 | 0.01 | 0.02 | 0.00 | 0.89 | 0.08 | 0.02 | 0.31 | 0.01 |
| P46746 | 0.02 | 0.01 | 0.48 | 0.18 | 0.01 | 0.00 | 0.00 | 0.89 | 0.02 | 0.02 | 0.21 | 0.01 |
| P46748 | 0.02 | 0.01 | 0.54 | 0.20 | 0.01 | 0.00 | 0.00 | 0.89 | 0.04 | 0.02 | 0.31 | 0.01 |
| P46749 | 0.02 | 0.01 | 0.48 | 0.18 | 0.01 | 0.00 | 0.00 | 0.89 | 0.02 | 0.02 | 0.21 | 0.01 |
| P48269 | 0.52 | 0.05 | 1.00 | 0.25 | 0.18 | 0.01 | 0.12 | 0.31 | 0.07 | 0.13 | 0.12 | 0.15 |
| P48407 | 0.05 | 0.09 | 0.50 | 1.00 | 0.07 | 0.10 | 0.02 | 0.27 | 0.22 | 0.20 | 0.05 | 0.10 |
| P48496 | 0.05 | 0.09 | 0.88 | 0.50 | 0.05 | 0.10 | 0.05 | 0.21 | 0.05 | 0.09 | 0.13 | 0.06 |
| P48502 | 0.24 | 0.03 | 0.31 | 0.17 | 0.12 | 0.01 | 0.08 | 1.00 | 0.03 | 0.08 | 0.03 | 0.10 |
| P48504 | 0.25 | 0.03 | 0.31 | 0.17 | 0.12 | 0.01 | 0.08 | 1.00 | 0.03 | 0.08 | 0.03 | 0.13 |
| P48505 | 0.24 | 0.03 | 0.31 | 0.17 | 0.12 | 0.01 | 0.08 | 1.00 | 0.03 | 0.08 | 0.03 | 0.10 |
| P48513 | 0.04 | 0.02 | 0.27 | 0.24 | 0.04 | 0.01 | 0.01 | 0.18 | 1.00 | 0.02 | 0.06 | 0.05 |
| P48534 | 0.24 | 0.02 | 0.33 | 0.77 | 0.13 | 0.01 | 0.02 | 0.47 | 0.22 | 0.40 | 0.03 | 0.05 |
| P48578 | 0.20 | 0.13 | 0.27 | 1.00 | 0.25 | 0.12 | 0.03 | 0.25 | 0.84 | 0.05 | 0.02 | 0.17 |
| P48630 | 0.24 | 0.03 | 0.43 | 0.20 | 1.00 | 0.01 | 0.12 | 0.31 | 0.05 | 0.24 | 0.14 | 0.15 |
| P48732 | 0.05 | 0.04 | 0.38 | 0.57 | 0.02 | 0.04 | 0.00 | 0.17 | 0.93 | 0.09 | 0.00 | 0.05 |
| P49079 | 0.11 | 0.09 | 1.00 | 0.33 | 0.11 | 0.10 | 0.02 | 0.31 | 0.13 | 0.09 | 0.12 | 0.06 |
| P49175 | 0.24 | 0.50 | 0.32 | 0.17 | 0.18 | 0.38 | 0.12 | 0.26 | 0.15 | 0.09 | 0.01 | 1.00 |
| P49202 | 0.02 | 0.02 | 0.54 | 0.77 | 0.02 | 0.02 | 0.02 | 0.20 | 0.43 | 0.01 | 0.31 | 0.02 |
| P49235 | 0.17 | 0.33 | 1.00 | 0.33 | 0.33 | 0.38 | 0.03 | 0.13 | 0.67 | 0.09 | 0.12 | 0.22 |
| P49299 | 0.04 | 0.02 | 0.41 | 0.29 | 0.04 | 0.01 | 0.02 | 0.59 | 0.13 | 1.00 | 0.05 | 0.02 |
| P49311 | 0.08 | 0.02 | 0.51 | 0.24 | 0.03 | 0.02 | 0.01 | 0.22 | 0.84 | 0.01 | 0.21 | 0.03 |
| P49333 | 0.50 | 0.17 | 0.50 | 0.50 | 1.00 | 0.20 | 0.12 | 0.45 | 0.75 | 0.13 | 0.05 | 0.22 |
| P49364 | 0.02 | 0.02 | 0.42 | 0.56 | 0.04 | 0.01 | 0.02 | 1.00 | 0.44 | 0.08 | 0.05 | 0.02 |
| P49608 | 0.08 | 0.09 | 0.53 | 0.77 | 0.04 | 0.10 | 0.02 | 0.50 | 0.22 | 0.57 | 0.03 | 0.08 |
| P49727 | 0.25 | 0.03 | 0.50 | 0.36 | 0.18 | 0.01 | 0.12 | 1.00 | 0.18 | 0.08 | 0.03 | 0.15 |
| P49972 | 0.08 | 0.09 | 0.51 | 1.00 | 0.03 | 0.02 | 0.09 | 0.22 | 0.22 | 0.01 | 0.21 | 0.03 |
| P51428 | 0.02 | 0.01 | 0.48 | 0.18 | 0.01 | 0.00 | 0.00 | 0.89 | 0.02 | 0.02 | 0.21 | 0.01 |
| P52334 | 0.18 | 0.04 | 1.00 | 0.50 | 0.13 | 0.01 | 0.10 | 0.27 | 0.50 | 0.13 | 0.12 | 0.16 |
| P52399 | 0.25 | 0.55 | 0.32 | 0.26 | 0.06 | 0.69 | 0.06 | 0.13 | 0.24 | 0.09 | 0.01 | 0.25 |
| P52410 | 0.08 | 0.09 | 0.88 | 0.40 | 0.08 | 0.10 | 0.02 | 0.33 | 0.13 | 0.24 | 0.14 | 0.10 |

|        |      |      |      |      |      |      |      |      |      |      |      |      |
|--------|------|------|------|------|------|------|------|------|------|------|------|------|
| P52418 | 0.04 | 0.25 | 1.00 | 0.50 | 0.04 | 0.25 | 0.29 | 0.37 | 0.18 | 0.03 | 0.12 | 0.07 |
| P52420 | 0.08 | 0.04 | 1.00 | 0.24 | 0.04 | 0.04 | 0.01 | 0.42 | 0.18 | 0.09 | 0.12 | 0.05 |
| P52423 | 0.02 | 0.02 | 1.00 | 0.30 | 0.04 | 0.01 | 0.02 | 0.20 | 0.13 | 0.03 | 0.12 | 0.10 |
| P52424 | 0.08 | 0.02 | 0.85 | 0.77 | 0.04 | 0.00 | 0.02 | 0.89 | 0.22 | 0.04 | 0.12 | 0.04 |
| P52572 | 0.08 | 0.01 | 0.40 | 0.35 | 0.08 | 0.01 | 0.00 | 0.31 | 0.84 | 0.17 | 0.03 | 0.02 |
| P52580 | 0.14 | 0.02 | 0.67 | 1.00 | 0.14 | 0.01 | 0.02 | 0.31 | 0.43 | 0.08 | 0.03 | 0.02 |
| P52706 | 0.17 | 0.03 | 0.44 | 0.22 | 0.30 | 0.17 | 0.04 | 0.31 | 0.03 | 0.14 | 0.03 | 1.00 |
| P52902 | 0.25 | 0.09 | 0.33 | 0.47 | 0.25 | 0.10 | 0.00 | 1.00 | 0.01 | 0.09 | 0.03 | 0.25 |
| P52914 | 0.18 | 0.13 | 0.14 | 0.50 | 0.06 | 0.12 | 0.10 | 0.27 | 1.00 | 0.00 | 0.01 | 0.16 |
| P53536 | 0.09 | 0.18 | 1.00 | 0.50 | 0.04 | 0.18 | 0.29 | 0.31 | 0.14 | 0.09 | 0.12 | 0.11 |
| P53537 | 0.09 | 0.18 | 0.50 | 0.77 | 0.04 | 0.18 | 0.29 | 0.31 | 0.22 | 0.09 | 0.05 | 0.11 |
| P53665 | 0.08 | 0.04 | 0.50 | 0.44 | 0.08 | 0.01 | 0.03 | 1.00 | 0.20 | 0.24 | 0.14 | 0.10 |
| P53797 | 0.05 | 0.09 | 1.00 | 0.30 | 0.33 | 0.10 | 0.02 | 0.38 | 0.13 | 0.09 | 0.12 | 0.10 |
| P54211 | 1.00 | 0.13 | 0.35 | 0.25 | 0.18 | 0.12 | 0.12 | 0.91 | 0.18 | 0.03 | 0.03 | 0.28 |
| P54609 | 0.52 | 1.00 | 0.35 | 1.00 | 0.13 | 0.37 | 0.38 | 0.50 | 1.00 | 0.13 | 0.03 | 0.16 |
| P54774 | 0.52 | 0.13 | 0.35 | 0.28 | 0.12 | 0.12 | 0.08 | 0.28 | 0.64 | 0.03 | 0.03 | 0.12 |
| P55217 | 0.05 | 0.04 | 1.00 | 0.24 | 0.04 | 0.04 | 0.02 | 0.31 | 0.13 | 0.09 | 0.12 | 0.05 |
| P56350 | 0.04 | 0.10 | 0.85 | 0.35 | 0.05 | 0.00 | 0.00 | 0.09 | 0.64 | 0.01 | 0.12 | 0.05 |
| P56809 | 0.40 | 0.00 | 0.85 | 0.17 | 0.40 | 0.17 | 0.00 | 0.09 | 0.17 | 0.01 | 0.12 | 0.10 |
| P58908 | 0.33 | 0.20 | 0.27 | 0.24 | 0.40 | 0.20 | 0.04 | 0.18 | 0.18 | 0.02 | 0.02 | 1.00 |
| P59229 | 0.24 | 0.04 | 0.14 | 0.13 | 0.18 | 0.04 | 0.12 | 0.67 | 0.03 | 0.04 | 0.00 | 1.00 |
| P59287 | 0.12 | 0.10 | 1.00 | 0.26 | 0.05 | 0.12 | 0.01 | 0.18 | 0.24 | 0.09 | 0.12 | 0.17 |
| P59833 | 0.95 | 0.11 | 0.10 | 0.25 | 0.40 | 0.00 | 0.08 | 0.25 | 0.07 | 0.03 | 0.00 | 0.10 |
| P62787 | 0.52 | 0.21 | 0.85 | 0.44 | 0.09 | 0.07 | 0.07 | 0.25 | 1.00 | 0.05 | 0.05 | 0.62 |
| P68209 | 0.11 | 0.65 | 0.42 | 0.44 | 0.08 | 0.17 | 0.03 | 1.00 | 0.20 | 0.24 | 0.08 | 0.08 |
| P68514 | 0.24 | 0.03 | 0.10 | 0.12 | 0.18 | 0.00 | 0.12 | 0.93 | 0.03 | 0.03 | 0.00 | 0.15 |
| P80022 | 0.13 | 0.65 | 0.51 | 0.25 | 0.04 | 0.69 | 0.06 | 0.11 | 0.43 | 0.00 | 0.21 | 0.12 |
| P80030 | 0.08 | 0.01 | 1.00 | 0.20 | 0.08 | 0.01 | 0.00 | 0.31 | 0.05 | 0.24 | 0.14 | 0.10 |
| P80196 | 0.13 | 0.25 | 0.51 | 0.77 | 0.04 | 0.50 | 0.03 | 0.09 | 0.43 | 0.00 | 0.21 | 0.12 |
| P80269 | 0.24 | 0.03 | 0.53 | 0.24 | 0.12 | 0.01 | 0.08 | 1.00 | 0.18 | 0.08 | 0.03 | 0.10 |
| P80691 | 0.08 | 0.55 | 0.33 | 0.08 | 0.02 | 0.69 | 0.06 | 0.00 | 0.25 | 0.00 | 0.00 | 0.50 |
| P81131 | 0.08 | 0.55 | 0.00 | 0.08 | 0.02 | 1.00 | 0.02 | 0.00 | 0.02 | 0.00 | 0.00 | 0.06 |
| P82244 | 0.01 | 0.01 | 0.85 | 0.20 | 0.01 | 0.02 | 0.00 | 0.20 | 0.08 | 0.01 | 0.31 | 0.01 |
| P82411 | 0.01 | 0.01 | 0.85 | 0.18 | 0.01 | 0.02 | 0.00 | 0.20 | 0.08 | 0.01 | 0.31 | 0.01 |
| P82412 | 0.01 | 0.01 | 0.85 | 0.18 | 0.01 | 0.02 | 0.00 | 0.20 | 0.08 | 0.01 | 0.31 | 0.01 |
| P82413 | 0.01 | 0.01 | 0.85 | 0.20 | 0.01 | 0.02 | 0.00 | 0.20 | 0.08 | 0.01 | 0.31 | 0.01 |
| P82873 | 0.24 | 0.10 | 0.27 | 0.50 | 0.25 | 0.01 | 0.21 | 1.00 | 0.20 | 0.04 | 0.02 | 0.16 |
| P83291 | 0.27 | 0.55 | 0.31 | 0.25 | 0.11 | 0.18 | 0.38 | 1.00 | 0.19 | 0.08 | 0.03 | 0.07 |
| P83326 | 1.00 | 0.50 | 0.09 | 0.77 | 0.02 | 0.00 | 0.02 | 0.05 | 0.22 | 0.00 | 0.00 | 0.02 |
| P84634 | 0.13 | 0.50 | 0.51 | 0.77 | 0.05 | 0.40 | 0.05 | 0.28 | 1.00 | 0.02 | 0.21 | 0.17 |
| P92812 | 0.02 | 0.01 | 0.67 | 0.20 | 0.01 | 0.00 | 0.00 | 1.00 | 0.04 | 0.02 | 0.21 | 0.01 |
| P92939 | 0.52 | 0.13 | 0.35 | 0.25 | 1.00 | 0.12 | 0.12 | 0.58 | 0.18 | 0.04 | 0.03 | 0.41 |
| P92959 | 0.11 | 0.01 | 1.00 | 0.20 | 0.02 | 0.02 | 0.00 | 0.89 | 0.08 | 0.04 | 0.31 | 0.04 |
| P92983 | 0.24 | 0.01 | 0.31 | 0.27 | 0.12 | 0.07 | 0.00 | 1.00 | 0.53 | 0.12 | 0.03 | 0.07 |
| P93022 | 0.31 | 0.02 | 0.19 | 0.67 | 0.17 | 0.00 | 0.17 | 0.09 | 1.00 | 0.02 | 0.06 | 0.18 |
| P93026 | 0.52 | 0.17 | 0.17 | 1.00 | 0.79 | 0.08 | 1.00 | 0.32 | 0.49 | 0.03 | 0.00 | 0.50 |

|        |      |      |      |      |      |      |      |      |      |      |      |      |
|--------|------|------|------|------|------|------|------|------|------|------|------|------|
| P93033 | 0.24 | 0.04 | 0.44 | 0.26 | 0.11 | 0.04 | 0.05 | 1.00 | 0.49 | 0.24 | 0.03 | 0.08 |
| P93045 | 0.04 | 0.04 | 0.33 | 0.28 | 0.03 | 0.00 | 0.00 | 0.13 | 1.00 | 0.00 | 0.06 | 0.01 |
| P93164 | 0.13 | 1.00 | 0.50 | 0.25 | 0.10 | 1.00 | 0.06 | 0.17 | 0.15 | 0.09 | 0.03 | 0.13 |
| P93184 | 0.08 | 0.02 | 1.00 | 0.57 | 0.08 | 0.01 | 0.01 | 0.31 | 0.50 | 0.43 | 0.14 | 0.17 |
| P93203 | 0.07 | 0.02 | 0.19 | 0.50 | 0.03 | 0.00 | 0.05 | 0.09 | 1.00 | 0.02 | 0.05 | 0.04 |
| P93303 | 0.35 | 0.04 | 0.85 | 0.20 | 0.18 | 0.04 | 0.12 | 1.00 | 0.10 | 0.03 | 0.03 | 0.62 |
| P93339 | 1.00 | 0.13 | 0.25 | 0.36 | 1.00 | 0.06 | 0.08 | 0.25 | 0.36 | 0.03 | 0.13 | 0.13 |
| P93349 | 0.19 | 1.00 | 0.41 | 0.24 | 0.06 | 1.00 | 0.10 | 0.13 | 0.15 | 0.09 | 0.05 | 0.22 |
| P93508 | 0.15 | 0.20 | 0.27 | 0.38 | 1.00 | 0.20 | 0.08 | 0.40 | 0.18 | 0.02 | 0.02 | 0.23 |
| P93654 | 0.50 | 0.20 | 0.20 | 0.26 | 0.18 | 0.04 | 0.67 | 0.32 | 0.49 | 0.04 | 0.00 | 1.00 |
| P93655 | 0.50 | 0.20 | 0.85 | 0.44 | 0.25 | 0.12 | 0.05 | 1.00 | 0.68 | 0.04 | 0.20 | 0.13 |
| P93788 | 1.00 | 0.05 | 0.14 | 0.25 | 0.12 | 0.00 | 0.10 | 0.27 | 0.07 | 0.03 | 0.00 | 0.16 |
| P93804 | 0.09 | 0.18 | 0.61 | 0.77 | 0.05 | 0.18 | 0.05 | 0.18 | 0.22 | 0.05 | 0.04 | 0.11 |
| P93834 | 0.24 | 0.18 | 0.84 | 0.47 | 0.18 | 0.18 | 0.12 | 1.00 | 0.33 | 0.04 | 0.12 | 0.17 |
| P93836 | 0.07 | 0.07 | 0.43 | 1.00 | 0.13 | 0.01 | 0.02 | 0.31 | 0.27 | 0.13 | 0.03 | 0.05 |
| P94026 | 0.02 | 0.02 | 1.00 | 0.63 | 0.04 | 0.01 | 0.02 | 0.13 | 0.50 | 0.03 | 0.12 | 0.02 |
| P94044 | 0.09 | 0.02 | 0.85 | 0.24 | 0.06 | 0.01 | 0.01 | 0.80 | 0.18 | 0.08 | 0.12 | 0.05 |
| Q00265 | 0.01 | 0.01 | 0.19 | 0.24 | 0.02 | 0.00 | 0.00 | 0.09 | 1.00 | 0.00 | 0.05 | 0.01 |
| Q00326 | 0.17 | 0.33 | 0.32 | 0.24 | 0.09 | 0.38 | 0.04 | 0.18 | 0.18 | 0.09 | 0.02 | 1.00 |
| Q00497 | 0.08 | 0.02 | 1.00 | 0.26 | 0.04 | 0.01 | 0.02 | 0.28 | 0.18 | 0.03 | 0.12 | 0.05 |
| Q00834 | 0.02 | 0.02 | 0.79 | 0.77 | 0.04 | 0.01 | 0.02 | 0.50 | 0.22 | 0.03 | 0.05 | 0.02 |
| Q00865 | 0.01 | 0.00 | 0.85 | 0.02 | 0.01 | 0.00 | 0.00 | 0.09 | 0.02 | 0.01 | 0.12 | 0.01 |
| Q01292 | 0.18 | 0.02 | 1.00 | 0.33 | 0.06 | 0.01 | 0.01 | 0.31 | 0.45 | 0.08 | 0.12 | 0.05 |
| Q01594 | 0.08 | 0.04 | 0.44 | 0.22 | 0.09 | 0.04 | 0.04 | 0.17 | 0.03 | 0.09 | 0.03 | 1.00 |
| Q01607 | 0.02 | 0.01 | 0.48 | 0.20 | 0.01 | 0.00 | 0.00 | 0.89 | 0.04 | 0.02 | 0.26 | 0.01 |
| Q02073 | 0.08 | 0.02 | 1.00 | 0.77 | 0.33 | 0.00 | 0.02 | 0.33 | 0.22 | 0.01 | 0.12 | 0.04 |
| Q02500 | 0.24 | 0.03 | 0.31 | 0.17 | 0.18 | 0.01 | 0.12 | 1.00 | 0.03 | 0.08 | 0.03 | 0.15 |
| Q03464 | 0.13 | 0.65 | 0.14 | 0.50 | 0.05 | 0.42 | 0.03 | 0.11 | 0.50 | 0.00 | 0.01 | 0.17 |
| Q03685 | 0.10 | 0.02 | 0.35 | 0.20 | 1.00 | 0.00 | 0.04 | 0.28 | 0.10 | 0.01 | 0.03 | 0.08 |
| Q04522 | 0.02 | 0.02 | 0.41 | 0.77 | 0.50 | 0.01 | 0.02 | 0.13 | 0.22 | 0.03 | 0.05 | 0.02 |
| Q04613 | 0.24 | 0.04 | 0.14 | 0.12 | 0.18 | 0.00 | 0.12 | 1.00 | 0.03 | 0.03 | 0.00 | 0.40 |
| Q04716 | 0.02 | 0.01 | 0.51 | 0.18 | 0.01 | 0.02 | 0.00 | 0.89 | 0.08 | 0.02 | 0.21 | 0.01 |
| Q05001 | 0.24 | 0.03 | 0.31 | 0.40 | 1.00 | 0.01 | 0.12 | 0.31 | 0.03 | 0.40 | 0.03 | 0.15 |
| Q05091 | 0.11 | 0.65 | 0.15 | 0.20 | 0.04 | 0.42 | 0.02 | 0.11 | 0.04 | 0.04 | 0.00 | 0.06 |
| Q05153 | 0.01 | 0.01 | 0.19 | 0.40 | 0.05 | 0.00 | 0.02 | 0.17 | 1.00 | 0.00 | 0.06 | 0.01 |
| Q05492 | 0.02 | 0.01 | 0.48 | 0.18 | 0.01 | 0.00 | 0.00 | 0.89 | 0.02 | 0.02 | 0.21 | 0.01 |
| Q05538 | 0.13 | 0.65 | 0.32 | 0.26 | 0.09 | 0.42 | 0.04 | 0.13 | 0.24 | 0.09 | 0.01 | 0.62 |
| Q05728 | 0.08 | 0.05 | 0.88 | 0.77 | 0.04 | 0.00 | 0.02 | 0.89 | 0.22 | 0.04 | 0.12 | 0.04 |
| Q05753 | 0.07 | 0.02 | 0.85 | 0.26 | 0.03 | 0.00 | 0.05 | 0.09 | 0.49 | 0.02 | 0.12 | 0.04 |
| Q06197 | 0.04 | 0.02 | 0.61 | 1.00 | 0.08 | 0.01 | 0.02 | 0.67 | 0.22 | 0.57 | 0.06 | 0.05 |
| Q06364 | 0.01 | 0.01 | 0.04 | 0.24 | 0.02 | 0.00 | 0.00 | 0.02 | 1.00 | 0.00 | 0.00 | 0.01 |
| Q06450 | 0.24 | 0.04 | 0.14 | 0.12 | 0.12 | 0.00 | 0.10 | 1.00 | 0.03 | 0.03 | 0.00 | 0.28 |
| Q06611 | 0.52 | 0.05 | 0.23 | 0.25 | 0.33 | 0.00 | 0.12 | 0.27 | 0.07 | 0.03 | 0.00 | 0.33 |
| Q06801 | 0.09 | 0.18 | 1.00 | 0.29 | 0.04 | 0.18 | 0.29 | 0.13 | 0.14 | 0.03 | 0.12 | 0.11 |
| Q06FN2 | 0.02 | 0.02 | 0.85 | 0.24 | 0.04 | 0.01 | 0.02 | 0.17 | 0.70 | 0.03 | 0.31 | 0.02 |
| Q06FW2 | 0.01 | 0.01 | 0.85 | 0.20 | 0.01 | 0.00 | 0.00 | 0.20 | 0.04 | 0.01 | 0.21 | 0.01 |

|        |      |      |      |      |      |      |      |      |      |      |      |      |
|--------|------|------|------|------|------|------|------|------|------|------|------|------|
| Q06GS8 | 0.01 | 0.01 | 0.85 | 0.20 | 0.01 | 0.00 | 0.00 | 0.20 | 0.04 | 0.01 | 0.21 | 0.01 |
| Q06R99 | 0.01 | 0.01 | 0.85 | 0.18 | 0.01 | 0.02 | 0.00 | 0.20 | 0.08 | 0.01 | 0.31 | 0.01 |
| Q06RB0 | 0.01 | 0.01 | 0.85 | 0.20 | 0.01 | 0.02 | 0.00 | 0.20 | 0.08 | 0.01 | 0.31 | 0.01 |
| Q06SG0 | 0.01 | 0.01 | 0.85 | 0.18 | 0.01 | 0.02 | 0.00 | 0.20 | 0.08 | 0.01 | 0.31 | 0.01 |
| Q06SG5 | 0.01 | 0.01 | 0.85 | 0.18 | 0.01 | 0.02 | 0.00 | 0.26 | 0.08 | 0.01 | 0.31 | 0.01 |
| Q06SI4 | 0.01 | 0.01 | 0.85 | 0.18 | 0.01 | 0.02 | 0.00 | 0.26 | 0.08 | 0.01 | 0.26 | 0.01 |
| Q06SJ3 | 0.01 | 0.01 | 0.85 | 0.20 | 0.01 | 0.02 | 0.00 | 0.26 | 0.08 | 0.01 | 0.31 | 0.01 |
| Q07510 | 0.08 | 0.09 | 1.00 | 0.24 | 0.08 | 0.10 | 0.02 | 0.33 | 0.13 | 0.24 | 0.14 | 0.10 |
| Q08276 | 0.08 | 0.02 | 0.35 | 0.22 | 0.40 | 0.00 | 0.01 | 0.89 | 0.10 | 0.02 | 0.03 | 0.04 |
| Q08655 | 0.18 | 0.03 | 0.67 | 0.33 | 0.33 | 0.07 | 0.00 | 0.44 | 0.84 | 0.01 | 0.19 | 0.07 |
| Q09152 | 0.08 | 0.04 | 0.50 | 0.77 | 0.50 | 0.01 | 0.03 | 0.89 | 0.22 | 0.15 | 0.08 | 0.10 |
| Q09FY3 | 0.02 | 0.02 | 0.85 | 0.24 | 0.04 | 0.02 | 0.02 | 0.20 | 0.13 | 0.03 | 0.27 | 0.02 |
| Q0J411 | 0.33 | 0.14 | 0.46 | 0.79 | 0.18 | 0.01 | 0.14 | 0.28 | 1.00 | 0.03 | 0.05 | 0.05 |
| Q0JBF0 | 0.04 | 0.02 | 0.27 | 0.40 | 0.05 | 0.01 | 0.02 | 0.18 | 0.84 | 0.02 | 0.02 | 0.05 |
| Q0WQF7 | 0.05 | 0.09 | 0.50 | 0.47 | 0.07 | 0.10 | 0.02 | 1.00 | 0.13 | 0.09 | 0.05 | 0.07 |
| Q10712 | 0.13 | 0.13 | 1.00 | 0.77 | 0.10 | 0.13 | 0.04 | 0.20 | 0.22 | 0.02 | 0.19 | 0.13 |
| Q11207 | 0.02 | 0.14 | 0.41 | 0.77 | 0.04 | 0.01 | 0.29 | 0.13 | 1.00 | 0.03 | 0.05 | 0.07 |
| Q1ACG0 | 0.01 | 0.01 | 0.85 | 0.20 | 0.01 | 0.00 | 0.00 | 0.20 | 0.04 | 0.01 | 0.31 | 0.01 |
| Q20EV4 | 0.36 | 0.10 | 1.00 | 0.35 | 0.05 | 0.00 | 0.01 | 0.28 | 0.64 | 0.01 | 0.12 | 0.18 |
| Q20EX1 | 0.02 | 0.02 | 0.85 | 0.24 | 0.04 | 0.01 | 0.02 | 0.13 | 0.70 | 0.03 | 0.50 | 0.02 |
| Q20EX8 | 0.08 | 0.02 | 1.00 | 0.24 | 0.06 | 0.01 | 0.01 | 0.37 | 0.18 | 0.08 | 0.12 | 0.05 |
| Q20EX9 | 0.08 | 0.02 | 1.00 | 0.24 | 0.06 | 0.01 | 0.01 | 0.37 | 0.18 | 0.08 | 0.12 | 0.05 |
| Q2EEV7 | 0.08 | 0.20 | 0.84 | 0.38 | 0.03 | 0.00 | 0.09 | 0.22 | 0.10 | 0.01 | 0.20 | 0.03 |
| Q2EEV8 | 0.02 | 0.02 | 0.84 | 0.24 | 0.04 | 0.02 | 0.02 | 0.20 | 0.13 | 0.03 | 0.27 | 0.02 |
| Q2EEV9 | 0.00 | 0.01 | 0.84 | 0.18 | 0.00 | 0.02 | 0.00 | 0.26 | 0.08 | 0.00 | 0.31 | 0.00 |
| Q2EEW0 | 0.00 | 0.01 | 0.84 | 0.18 | 0.00 | 0.02 | 0.00 | 0.26 | 0.08 | 0.00 | 0.31 | 0.00 |
| Q2EEW1 | 0.01 | 0.01 | 0.84 | 0.20 | 0.00 | 0.00 | 0.00 | 0.20 | 0.04 | 0.01 | 0.31 | 0.00 |
| Q2EEW2 | 0.00 | 0.01 | 0.84 | 0.18 | 0.00 | 0.02 | 0.00 | 0.20 | 0.08 | 0.00 | 0.31 | 0.00 |
| Q2EEW3 | 0.01 | 0.01 | 0.84 | 0.20 | 0.00 | 0.02 | 0.00 | 0.20 | 0.08 | 0.01 | 0.31 | 0.00 |
| Q2EEW4 | 0.00 | 0.01 | 0.84 | 0.18 | 0.00 | 0.02 | 0.00 | 0.20 | 0.08 | 0.00 | 0.31 | 0.00 |
| Q2EEW6 | 0.00 | 0.01 | 0.84 | 0.18 | 0.00 | 0.02 | 0.00 | 0.20 | 0.08 | 0.00 | 0.31 | 0.00 |
| Q2EEW7 | 0.02 | 0.02 | 0.84 | 0.24 | 0.04 | 0.01 | 0.02 | 0.17 | 0.70 | 0.03 | 0.31 | 0.02 |
| Q2EEW8 | 0.01 | 0.01 | 0.84 | 0.20 | 0.00 | 0.00 | 0.00 | 0.20 | 0.04 | 0.01 | 0.21 | 0.00 |
| Q2EEW9 | 0.02 | 0.02 | 0.84 | 0.24 | 0.04 | 0.01 | 0.02 | 0.13 | 0.70 | 0.03 | 0.31 | 0.02 |
| Q2EEX0 | 0.02 | 0.02 | 0.84 | 0.24 | 0.04 | 0.01 | 0.02 | 0.13 | 0.70 | 0.03 | 0.31 | 0.02 |
| Q2EEX2 | 0.02 | 0.02 | 0.84 | 0.24 | 0.04 | 0.01 | 0.02 | 0.13 | 0.70 | 0.03 | 0.50 | 0.02 |
| Q2EEX3 | 0.01 | 0.01 | 0.84 | 0.20 | 0.00 | 0.02 | 0.00 | 0.20 | 0.08 | 0.01 | 0.31 | 0.00 |
| Q2EEX9 | 0.08 | 0.02 | 0.84 | 0.77 | 0.04 | 0.00 | 0.02 | 0.42 | 0.22 | 0.04 | 0.50 | 0.04 |
| Q2QSB9 | 0.13 | 0.13 | 0.67 | 0.77 | 0.10 | 0.13 | 0.04 | 0.20 | 0.22 | 0.02 | 0.19 | 0.13 |
| Q2QYF3 | 0.27 | 0.02 | 0.18 | 1.00 | 0.05 | 0.00 | 0.02 | 0.05 | 1.00 | 0.00 | 0.06 | 0.18 |
| Q2V4F9 | 0.35 | 0.03 | 0.13 | 0.13 | 0.18 | 0.04 | 0.12 | 0.26 | 0.03 | 0.04 | 0.00 | 0.62 |
| Q2WGC1 | 0.08 | 0.02 | 0.85 | 0.20 | 0.03 | 0.02 | 0.01 | 0.22 | 0.10 | 0.01 | 0.31 | 0.03 |
| Q32001 | 0.13 | 0.13 | 1.00 | 0.17 | 0.04 | 0.14 | 0.03 | 0.09 | 0.43 | 0.01 | 0.12 | 0.12 |
| Q32063 | 0.01 | 0.00 | 0.85 | 0.02 | 0.01 | 0.00 | 0.00 | 0.09 | 0.02 | 0.01 | 0.12 | 0.01 |
| Q32065 | 0.11 | 0.20 | 0.85 | 0.20 | 0.10 | 0.06 | 0.03 | 0.89 | 0.20 | 0.04 | 0.12 | 0.13 |
| Q32S00 | 0.01 | 0.01 | 0.85 | 0.20 | 0.01 | 0.00 | 0.00 | 0.20 | 0.04 | 0.01 | 0.21 | 0.01 |

|        |      |      |      |      |      |      |      |      |      |      |      |      |
|--------|------|------|------|------|------|------|------|------|------|------|------|------|
| Q32S08 | 0.24 | 0.03 | 1.00 | 0.17 | 0.18 | 0.01 | 0.12 | 0.69 | 0.04 | 0.08 | 0.12 | 0.15 |
| Q32SG5 | 0.07 | 0.02 | 0.51 | 0.26 | 0.03 | 0.02 | 0.05 | 0.09 | 0.84 | 0.02 | 0.21 | 0.04 |
| Q32SG6 | 0.07 | 0.02 | 0.18 | 0.60 | 0.03 | 0.00 | 0.05 | 0.09 | 1.00 | 0.02 | 0.06 | 0.04 |
| Q37617 | 0.24 | 0.03 | 0.50 | 0.17 | 0.18 | 0.01 | 0.12 | 1.00 | 0.03 | 0.08 | 0.03 | 0.15 |
| Q37619 | 0.10 | 0.01 | 0.70 | 0.17 | 0.06 | 0.01 | 0.00 | 1.00 | 0.01 | 0.08 | 0.06 | 0.02 |
| Q38707 | 0.04 | 0.03 | 0.31 | 1.00 | 0.06 | 0.01 | 0.02 | 0.44 | 0.32 | 0.08 | 0.03 | 0.05 |
| Q38716 | 0.13 | 0.55 | 0.51 | 0.25 | 0.04 | 0.69 | 0.06 | 0.09 | 0.43 | 0.00 | 0.21 | 0.12 |
| Q38732 | 0.01 | 0.00 | 0.85 | 0.02 | 0.01 | 0.00 | 0.00 | 0.09 | 0.02 | 0.01 | 0.12 | 0.01 |
| Q38796 | 0.07 | 0.02 | 0.19 | 0.40 | 0.05 | 0.00 | 0.05 | 0.17 | 0.92 | 0.02 | 0.05 | 0.04 |
| Q38799 | 0.15 | 0.33 | 0.38 | 0.47 | 0.12 | 0.37 | 0.38 | 0.95 | 0.60 | 0.09 | 0.03 | 0.41 |
| Q38802 | 0.08 | 0.09 | 1.00 | 0.36 | 0.50 | 0.10 | 0.05 | 0.13 | 0.80 | 0.09 | 0.12 | 0.08 |
| Q38813 | 0.08 | 0.02 | 0.34 | 0.36 | 0.40 | 0.01 | 0.01 | 1.00 | 0.18 | 0.02 | 0.02 | 0.05 |
| Q38819 | 0.20 | 0.10 | 0.15 | 0.40 | 0.05 | 0.00 | 0.05 | 0.20 | 1.00 | 0.02 | 0.00 | 0.05 |
| Q38847 | 0.18 | 0.08 | 0.42 | 0.77 | 0.13 | 0.00 | 0.05 | 0.17 | 1.00 | 0.08 | 0.17 | 0.08 |
| Q38859 | 0.01 | 0.01 | 0.56 | 0.24 | 0.03 | 0.00 | 0.00 | 0.17 | 1.00 | 0.00 | 0.31 | 0.01 |
| Q38869 | 0.33 | 0.10 | 0.46 | 1.00 | 0.20 | 0.08 | 0.08 | 0.28 | 0.84 | 0.20 | 0.05 | 0.30 |
| Q38882 | 0.52 | 0.21 | 0.85 | 0.83 | 0.79 | 0.12 | 0.50 | 0.93 | 0.84 | 0.24 | 0.12 | 1.00 |
| Q38890 | 1.00 | 0.76 | 0.44 | 0.50 | 0.18 | 0.38 | 0.80 | 0.26 | 0.50 | 0.09 | 0.01 | 0.30 |
| Q38897 | 0.29 | 0.21 | 0.19 | 0.44 | 0.07 | 0.04 | 0.07 | 0.16 | 0.85 | 0.04 | 0.06 | 0.07 |
| Q38899 | 0.07 | 0.02 | 0.08 | 0.26 | 0.03 | 0.00 | 0.05 | 0.09 | 1.00 | 0.02 | 0.00 | 0.04 |
| Q38946 | 0.15 | 0.09 | 0.56 | 0.25 | 0.11 | 0.08 | 0.38 | 1.00 | 0.32 | 0.08 | 0.03 | 0.41 |
| Q39097 | 0.02 | 0.02 | 0.46 | 1.00 | 0.02 | 0.00 | 0.02 | 0.20 | 0.67 | 0.00 | 0.20 | 0.02 |
| Q39119 | 0.25 | 0.13 | 0.33 | 0.33 | 0.14 | 0.17 | 0.25 | 0.20 | 0.67 | 0.14 | 0.04 | 1.00 |
| Q39129 | 0.02 | 0.02 | 1.00 | 0.24 | 0.04 | 0.01 | 0.02 | 0.13 | 0.13 | 0.03 | 0.12 | 0.02 |
| Q39211 | 0.07 | 0.05 | 0.56 | 0.77 | 0.03 | 0.00 | 0.05 | 0.25 | 1.00 | 0.05 | 0.31 | 0.04 |
| Q39214 | 0.52 | 0.10 | 0.35 | 1.00 | 0.18 | 0.12 | 0.08 | 0.28 | 0.49 | 0.03 | 0.03 | 0.20 |
| Q39218 | 0.07 | 0.08 | 0.79 | 0.77 | 0.08 | 0.08 | 0.05 | 0.89 | 0.49 | 0.07 | 0.05 | 0.08 |
| Q39234 | 0.20 | 0.10 | 0.50 | 0.60 | 0.12 | 0.12 | 0.05 | 0.12 | 0.87 | 0.02 | 0.06 | 0.30 |
| Q39238 | 0.33 | 0.07 | 0.85 | 0.77 | 0.13 | 0.01 | 0.05 | 0.28 | 1.00 | 0.13 | 0.05 | 0.04 |
| Q39242 | 0.03 | 0.02 | 0.33 | 1.00 | 0.06 | 0.17 | 0.02 | 0.95 | 0.22 | 0.08 | 0.03 | 0.02 |
| Q39255 | 0.52 | 0.33 | 0.17 | 1.00 | 0.15 | 0.08 | 0.14 | 0.50 | 1.00 | 0.04 | 0.00 | 0.08 |
| Q39513 | 0.13 | 0.13 | 1.00 | 0.20 | 0.08 | 0.12 | 0.03 | 0.14 | 0.15 | 0.24 | 0.14 | 0.12 |
| Q39649 | 0.40 | 0.07 | 0.10 | 0.21 | 0.40 | 0.07 | 0.04 | 0.04 | 0.03 | 0.01 | 0.00 | 1.00 |
| Q39659 | 0.08 | 0.09 | 0.45 | 0.36 | 0.08 | 0.10 | 0.05 | 0.31 | 0.05 | 1.00 | 0.12 | 0.10 |
| Q39818 | 0.02 | 0.00 | 0.07 | 0.05 | 0.01 | 0.00 | 0.00 | 0.89 | 0.01 | 0.02 | 0.00 | 0.01 |
| Q39962 | 0.08 | 0.03 | 0.01 | 0.13 | 0.09 | 0.04 | 0.04 | 0.04 | 0.03 | 0.01 | 0.00 | 0.62 |
| Q3BAI2 | 0.01 | 0.00 | 0.85 | 0.02 | 0.01 | 0.00 | 0.00 | 0.09 | 0.02 | 0.01 | 0.12 | 0.01 |
| Q3E7D0 | 1.00 | 0.05 | 0.23 | 0.25 | 0.18 | 0.00 | 0.12 | 0.27 | 0.07 | 0.03 | 0.00 | 0.50 |
| Q3ZJ77 | 0.02 | 0.02 | 0.85 | 0.24 | 0.04 | 0.01 | 0.02 | 0.17 | 0.70 | 0.03 | 0.31 | 0.02 |
| Q3ZJ89 | 0.08 | 0.02 | 0.85 | 0.77 | 0.04 | 0.00 | 0.02 | 0.42 | 0.22 | 0.04 | 0.50 | 0.04 |
| Q3ZJ90 | 0.02 | 0.02 | 0.85 | 0.24 | 0.04 | 0.01 | 0.02 | 0.13 | 0.70 | 0.03 | 0.31 | 0.02 |
| Q40147 | 0.05 | 0.04 | 1.00 | 0.36 | 0.05 | 0.04 | 0.05 | 0.33 | 0.05 | 0.09 | 0.12 | 0.05 |
| Q40161 | 0.19 | 1.00 | 0.15 | 0.20 | 0.04 | 1.00 | 0.10 | 0.11 | 0.04 | 0.04 | 0.00 | 0.06 |
| Q40478 | 0.12 | 0.10 | 0.19 | 0.33 | 0.08 | 0.12 | 0.00 | 0.09 | 0.85 | 0.00 | 0.06 | 0.17 |
| Q40545 | 0.08 | 0.04 | 0.85 | 0.50 | 0.04 | 0.04 | 0.02 | 0.28 | 0.18 | 0.09 | 0.12 | 0.05 |
| Q40577 | 0.08 | 0.09 | 0.75 | 1.00 | 0.04 | 0.10 | 0.02 | 0.18 | 0.22 | 0.09 | 0.04 | 0.08 |

|        |      |      |      |      |      |      |      |      |      |      |      |      |
|--------|------|------|------|------|------|------|------|------|------|------|------|------|
| Q40966 | 0.13 | 0.55 | 0.51 | 0.25 | 0.04 | 0.69 | 0.06 | 0.09 | 0.43 | 0.00 | 0.21 | 0.12 |
| Q40987 | 0.24 | 0.20 | 0.10 | 1.00 | 0.40 | 0.20 | 0.08 | 0.25 | 0.03 | 0.03 | 0.00 | 0.20 |
| Q41261 | 0.02 | 0.02 | 0.09 | 0.77 | 0.05 | 0.00 | 0.02 | 0.05 | 0.92 | 0.00 | 0.00 | 0.02 |
| Q41764 | 0.02 | 0.02 | 0.50 | 1.00 | 0.02 | 0.00 | 0.02 | 0.13 | 0.22 | 0.01 | 0.19 | 0.02 |
| Q42191 | 0.24 | 0.03 | 0.10 | 0.12 | 0.18 | 0.00 | 0.12 | 1.00 | 0.03 | 0.03 | 0.00 | 0.15 |
| Q42290 | 0.24 | 0.65 | 0.85 | 0.33 | 0.12 | 0.17 | 0.08 | 1.00 | 0.60 | 0.09 | 0.04 | 0.41 |
| Q42463 | 0.01 | 0.00 | 0.85 | 0.02 | 0.01 | 0.00 | 0.00 | 0.09 | 0.02 | 0.01 | 0.12 | 0.01 |
| Q42484 | 0.52 | 0.10 | 0.35 | 1.00 | 0.18 | 0.12 | 0.08 | 0.28 | 0.49 | 0.03 | 0.03 | 0.20 |
| Q42523 | 0.08 | 0.10 | 0.42 | 0.50 | 0.04 | 0.04 | 0.01 | 1.00 | 0.20 | 0.09 | 0.08 | 0.05 |
| Q42533 | 0.11 | 0.00 | 0.88 | 0.20 | 0.08 | 0.00 | 0.00 | 0.14 | 0.05 | 0.24 | 0.33 | 0.10 |
| Q42539 | 0.15 | 0.04 | 0.41 | 1.00 | 0.33 | 0.04 | 0.03 | 0.50 | 0.50 | 0.04 | 0.05 | 0.50 |
| Q42545 | 0.33 | 0.10 | 1.00 | 0.77 | 0.13 | 0.00 | 0.13 | 0.25 | 0.64 | 0.13 | 0.12 | 0.13 |
| Q42564 | 0.29 | 0.21 | 0.85 | 0.44 | 0.18 | 0.04 | 0.38 | 0.89 | 0.49 | 1.00 | 0.12 | 0.62 |
| Q42577 | 0.10 | 0.03 | 0.70 | 0.24 | 0.06 | 0.01 | 0.01 | 1.00 | 0.32 | 0.08 | 0.03 | 0.05 |
| Q42588 | 0.05 | 0.04 | 1.00 | 0.77 | 0.07 | 0.06 | 0.03 | 0.40 | 0.84 | 0.07 | 0.12 | 0.07 |
| Q42589 | 0.67 | 0.76 | 0.50 | 0.25 | 0.07 | 0.42 | 0.13 | 0.27 | 0.30 | 0.04 | 0.00 | 0.30 |
| Q42686 | 0.09 | 0.18 | 0.38 | 0.33 | 0.08 | 0.18 | 0.02 | 0.95 | 0.03 | 0.33 | 0.03 | 0.11 |
| Q42688 | 0.25 | 0.04 | 0.42 | 0.77 | 0.04 | 0.04 | 0.02 | 0.42 | 0.22 | 0.09 | 0.08 | 0.05 |
| Q42736 | 0.08 | 0.04 | 1.00 | 0.24 | 0.50 | 0.04 | 0.02 | 0.28 | 0.18 | 0.09 | 0.12 | 0.05 |
| Q42806 | 0.08 | 0.04 | 0.61 | 0.77 | 0.04 | 0.04 | 0.02 | 0.28 | 0.22 | 0.09 | 0.05 | 0.05 |
| Q42961 | 0.08 | 0.02 | 0.88 | 0.50 | 0.04 | 0.01 | 0.02 | 0.28 | 0.13 | 0.03 | 0.13 | 0.04 |
| Q43064 | 0.11 | 0.09 | 1.00 | 0.25 | 0.04 | 0.10 | 0.02 | 0.50 | 0.13 | 0.09 | 0.12 | 0.06 |
| Q43097 | 0.08 | 0.09 | 0.44 | 0.29 | 0.04 | 0.10 | 0.01 | 0.59 | 0.18 | 1.00 | 0.03 | 0.08 |
| Q43127 | 0.25 | 0.33 | 0.88 | 0.50 | 0.12 | 0.37 | 0.08 | 1.00 | 0.20 | 0.09 | 0.12 | 0.10 |
| Q43139 | 0.13 | 0.20 | 0.50 | 0.77 | 0.04 | 0.18 | 0.03 | 0.20 | 0.22 | 0.02 | 0.02 | 0.20 |
| Q43272 | 0.05 | 0.09 | 0.33 | 1.00 | 0.06 | 0.10 | 0.02 | 0.31 | 0.22 | 0.17 | 0.03 | 0.06 |
| Q43295 | 0.08 | 0.02 | 1.00 | 0.50 | 0.04 | 0.01 | 0.02 | 0.33 | 0.13 | 0.03 | 0.12 | 0.04 |
| Q43316 | 0.11 | 0.33 | 1.00 | 0.24 | 0.12 | 0.37 | 0.02 | 0.25 | 0.29 | 0.04 | 0.12 | 0.06 |
| Q43349 | 0.08 | 0.02 | 1.00 | 0.22 | 0.03 | 0.02 | 0.01 | 0.33 | 0.43 | 0.01 | 0.21 | 0.03 |
| Q43621 | 0.07 | 0.02 | 0.56 | 0.77 | 0.11 | 0.07 | 0.02 | 0.50 | 0.22 | 0.14 | 0.03 | 0.14 |
| Q43725 | 0.07 | 0.02 | 0.79 | 0.50 | 0.04 | 0.01 | 0.05 | 0.89 | 0.49 | 0.03 | 0.05 | 0.04 |
| Q43743 | 0.09 | 0.18 | 0.38 | 0.33 | 0.08 | 0.18 | 0.02 | 0.59 | 0.03 | 1.00 | 0.03 | 0.11 |
| Q43776 | 0.08 | 0.02 | 0.46 | 1.00 | 0.04 | 0.00 | 0.02 | 0.83 | 0.43 | 0.04 | 0.20 | 0.04 |
| Q4G2J3 | 0.24 | 0.13 | 0.25 | 0.13 | 0.90 | 0.06 | 0.12 | 0.26 | 0.10 | 0.03 | 0.13 | 0.15 |
| Q4QSC8 | 0.04 | 0.10 | 0.15 | 0.35 | 0.05 | 0.00 | 0.00 | 0.17 | 1.00 | 0.00 | 0.00 | 0.05 |
| Q4VYC8 | 0.01 | 0.01 | 0.18 | 0.24 | 0.50 | 0.00 | 0.00 | 0.03 | 0.85 | 0.00 | 0.06 | 0.01 |
| Q500Y9 | 0.08 | 0.09 | 0.50 | 1.00 | 0.04 | 0.10 | 0.03 | 0.28 | 0.22 | 0.09 | 0.05 | 0.06 |
| Q52TG1 | 0.01 | 0.01 | 0.85 | 0.14 | 0.01 | 0.02 | 0.00 | 0.09 | 0.13 | 0.01 | 0.25 | 0.01 |
| Q56WD9 | 0.24 | 0.09 | 0.85 | 0.44 | 0.20 | 0.14 | 0.08 | 0.89 | 0.60 | 1.00 | 0.14 | 0.41 |
| Q56WK6 | 0.52 | 0.67 | 0.85 | 1.00 | 0.18 | 0.37 | 0.38 | 0.27 | 0.64 | 0.04 | 0.02 | 0.62 |
| Q56XP4 | 0.52 | 0.05 | 0.25 | 0.25 | 0.18 | 0.04 | 0.25 | 0.63 | 0.19 | 0.04 | 0.00 | 1.00 |
| Q56YA5 | 0.52 | 0.33 | 0.88 | 0.25 | 0.12 | 0.37 | 0.08 | 0.50 | 0.13 | 1.00 | 0.10 | 0.10 |
| Q56ZN6 | 0.50 | 0.13 | 0.27 | 0.25 | 0.18 | 0.12 | 0.92 | 0.67 | 0.18 | 0.04 | 0.02 | 0.62 |
| Q570C0 | 0.33 | 0.10 | 0.14 | 0.50 | 0.33 | 0.12 | 0.33 | 0.09 | 1.00 | 0.02 | 0.00 | 0.17 |
| Q5MFV8 | 1.00 | 1.00 | 0.14 | 0.67 | 0.12 | 0.42 | 0.92 | 0.50 | 0.49 | 0.03 | 0.01 | 0.12 |
| Q5NE24 | 0.24 | 0.03 | 0.18 | 0.24 | 1.00 | 0.00 | 0.08 | 0.25 | 0.85 | 0.03 | 0.06 | 0.10 |

|        |      |      |      |      |      |      |      |      |      |      |      |      |
|--------|------|------|------|------|------|------|------|------|------|------|------|------|
| Q5SD32 | 0.01 | 0.01 | 0.85 | 0.20 | 0.01 | 0.02 | 0.00 | 0.20 | 0.08 | 0.01 | 0.31 | 0.01 |
| Q5W7F2 | 0.52 | 0.09 | 0.50 | 0.77 | 0.50 | 0.01 | 1.00 | 0.21 | 0.79 | 0.04 | 0.02 | 0.33 |
| Q5XPJ9 | 0.52 | 0.05 | 0.09 | 1.00 | 0.07 | 0.00 | 0.11 | 0.09 | 0.50 | 0.02 | 0.00 | 0.08 |
| Q5YGP7 | 0.31 | 0.02 | 0.20 | 0.40 | 0.15 | 0.00 | 0.05 | 0.09 | 1.00 | 0.02 | 0.06 | 0.08 |
| Q5YLB4 | 0.08 | 0.02 | 0.85 | 0.36 | 0.05 | 0.01 | 0.05 | 0.89 | 0.75 | 0.05 | 0.12 | 0.05 |
| Q64MA3 | 0.13 | 0.13 | 0.47 | 0.24 | 0.04 | 0.14 | 0.03 | 0.33 | 1.00 | 0.09 | 0.05 | 0.12 |
| Q67EU8 | 0.08 | 0.02 | 0.35 | 0.24 | 0.04 | 0.00 | 0.01 | 0.67 | 1.00 | 0.01 | 0.05 | 0.04 |
| Q67VS5 | 0.52 | 0.05 | 0.14 | 0.25 | 0.18 | 0.04 | 0.12 | 0.48 | 0.07 | 0.04 | 0.00 | 0.67 |
| Q67Y93 | 0.67 | 0.04 | 0.12 | 0.36 | 0.13 | 0.00 | 0.05 | 0.19 | 1.00 | 0.02 | 0.00 | 0.18 |
| Q680Q4 | 0.50 | 0.10 | 0.42 | 0.50 | 0.20 | 0.12 | 0.05 | 0.44 | 1.00 | 0.04 | 0.08 | 0.17 |
| Q6EUP4 | 0.02 | 0.02 | 0.09 | 0.77 | 0.50 | 0.00 | 0.02 | 0.05 | 0.84 | 0.00 | 0.00 | 0.02 |
| Q6JJ61 | 0.01 | 0.01 | 0.85 | 0.20 | 0.01 | 0.02 | 0.00 | 0.20 | 0.08 | 0.01 | 0.31 | 0.01 |
| Q6L545 | 0.13 | 0.13 | 0.32 | 0.77 | 0.25 | 0.12 | 0.03 | 0.13 | 1.00 | 0.09 | 0.01 | 0.12 |
| Q6NPN4 | 1.00 | 0.11 | 0.10 | 0.26 | 0.12 | 0.12 | 0.50 | 0.25 | 0.24 | 0.03 | 0.00 | 0.17 |
| Q6NPP4 | 0.20 | 0.10 | 0.50 | 0.27 | 0.13 | 0.06 | 0.00 | 0.09 | 1.00 | 0.00 | 0.06 | 0.30 |
| Q6Q4D0 | 0.24 | 0.10 | 0.15 | 0.35 | 0.12 | 0.00 | 0.08 | 0.25 | 1.00 | 0.03 | 0.00 | 0.10 |
| Q6R3K9 | 1.00 | 0.05 | 0.33 | 0.50 | 0.33 | 0.00 | 0.12 | 0.48 | 0.67 | 0.03 | 0.33 | 0.33 |
| Q6UDF0 | 0.24 | 0.76 | 0.41 | 0.29 | 0.18 | 0.19 | 0.92 | 0.26 | 0.14 | 0.03 | 0.05 | 0.15 |
| Q75RY2 | 0.07 | 0.02 | 0.08 | 0.50 | 0.03 | 0.00 | 0.05 | 0.09 | 1.00 | 0.02 | 0.00 | 0.04 |
| Q7DM58 | 0.75 | 0.21 | 0.35 | 0.27 | 0.18 | 0.14 | 0.38 | 0.28 | 0.53 | 0.14 | 0.03 | 0.78 |
| Q7G188 | 0.04 | 0.05 | 0.27 | 1.00 | 0.05 | 0.01 | 0.11 | 0.18 | 0.57 | 0.02 | 0.02 | 0.05 |
| Q7G7J6 | 0.67 | 0.02 | 0.20 | 0.50 | 0.14 | 0.00 | 0.50 | 0.19 | 1.00 | 0.02 | 0.06 | 0.14 |
| Q7X9I4 | 0.24 | 0.03 | 0.50 | 0.33 | 1.00 | 0.01 | 0.08 | 0.31 | 0.03 | 0.08 | 0.03 | 0.10 |
| Q7XAK4 | 0.06 | 0.01 | 0.20 | 0.38 | 0.02 | 0.00 | 0.33 | 0.06 | 1.00 | 0.00 | 0.00 | 0.01 |
| Q7XJ98 | 0.38 | 0.14 | 0.41 | 0.29 | 0.18 | 0.01 | 1.00 | 0.26 | 0.50 | 0.03 | 0.05 | 0.15 |
| Q7XJM2 | 0.06 | 0.02 | 1.00 | 0.57 | 0.11 | 0.01 | 0.06 | 0.31 | 0.50 | 0.08 | 0.12 | 0.05 |
| Q7YKY4 | 0.01 | 0.01 | 0.85 | 0.14 | 0.01 | 0.02 | 0.00 | 0.09 | 0.13 | 0.01 | 0.25 | 0.01 |
| Q84J70 | 0.15 | 0.01 | 0.19 | 0.31 | 0.13 | 0.07 | 0.00 | 0.33 | 1.00 | 0.00 | 0.05 | 0.07 |
| Q84JU6 | 0.14 | 0.02 | 0.41 | 1.00 | 0.14 | 0.06 | 0.05 | 0.18 | 1.00 | 0.03 | 0.05 | 0.05 |
| Q84K11 | 0.24 | 0.13 | 0.27 | 0.77 | 1.00 | 0.12 | 0.12 | 0.26 | 0.84 | 0.03 | 0.02 | 0.15 |
| Q84KG5 | 0.04 | 0.02 | 0.60 | 0.77 | 0.06 | 0.01 | 0.02 | 0.31 | 0.22 | 0.08 | 0.03 | 0.05 |
| Q84KJ5 | 0.27 | 0.02 | 1.00 | 0.43 | 0.18 | 0.00 | 0.01 | 1.00 | 0.81 | 0.02 | 0.12 | 0.04 |
| Q84M92 | 0.07 | 0.05 | 0.09 | 1.00 | 0.05 | 0.00 | 0.05 | 0.33 | 1.00 | 0.05 | 0.00 | 0.33 |
| Q84P23 | 0.08 | 0.09 | 0.50 | 0.43 | 0.08 | 0.10 | 0.01 | 0.42 | 0.14 | 1.00 | 0.14 | 0.10 |
| Q84Q77 | 0.01 | 0.01 | 0.04 | 0.36 | 0.09 | 0.00 | 0.00 | 0.45 | 0.84 | 0.00 | 0.00 | 0.01 |
| Q84TI7 | 0.52 | 0.05 | 0.17 | 0.50 | 0.18 | 0.04 | 0.12 | 0.48 | 0.25 | 0.03 | 0.00 | 0.67 |
| Q84VX3 | 0.07 | 0.02 | 0.08 | 0.40 | 0.05 | 0.00 | 0.05 | 0.09 | 1.00 | 0.02 | 0.00 | 0.04 |
| Q84Y18 | 0.04 | 0.03 | 0.30 | 0.77 | 0.04 | 0.01 | 0.02 | 0.44 | 0.84 | 0.02 | 0.02 | 0.05 |
| Q84Y95 | 0.35 | 0.02 | 0.88 | 0.30 | 0.25 | 0.01 | 0.25 | 0.64 | 0.18 | 0.08 | 0.12 | 0.50 |
| Q85A69 | 0.36 | 0.13 | 1.00 | 0.20 | 0.06 | 0.12 | 0.10 | 0.28 | 0.15 | 0.01 | 0.12 | 0.50 |
| Q85AT7 | 0.01 | 0.01 | 0.85 | 0.20 | 0.01 | 0.02 | 0.00 | 0.20 | 0.08 | 0.01 | 0.31 | 0.01 |
| Q85CT7 | 0.24 | 0.04 | 0.85 | 0.17 | 0.18 | 0.01 | 0.12 | 0.69 | 0.04 | 0.08 | 0.12 | 0.16 |
| Q85FG9 | 0.24 | 0.04 | 0.85 | 0.17 | 0.12 | 0.01 | 0.10 | 0.50 | 0.04 | 0.08 | 0.12 | 0.16 |
| Q85FL6 | 0.24 | 0.04 | 0.85 | 0.24 | 0.12 | 0.01 | 0.10 | 0.69 | 0.18 | 0.08 | 0.12 | 0.16 |
| Q85FP0 | 0.01 | 0.01 | 0.85 | 0.14 | 0.01 | 0.02 | 0.00 | 0.09 | 0.13 | 0.01 | 0.25 | 0.01 |
| Q85UK6 | 0.01 | 0.01 | 0.84 | 0.20 | 0.00 | 0.02 | 0.00 | 0.20 | 0.08 | 0.01 | 0.31 | 0.00 |

|        |      |      |      |      |      |      |      |      |      |      |      |      |
|--------|------|------|------|------|------|------|------|------|------|------|------|------|
| Q85WU2 | 0.24 | 0.07 | 1.00 | 0.25 | 0.18 | 0.00 | 0.21 | 0.32 | 0.04 | 0.03 | 0.12 | 0.16 |
| Q8GSP8 | 0.10 | 0.00 | 0.50 | 0.17 | 1.00 | 0.17 | 0.04 | 0.02 | 0.17 | 0.00 | 0.00 | 0.08 |
| Q8GTM0 | 0.14 | 0.55 | 0.02 | 0.33 | 0.29 | 0.42 | 0.04 | 0.04 | 0.24 | 0.01 | 0.00 | 0.67 |
| Q8GUI4 | 0.95 | 0.21 | 0.10 | 0.25 | 0.40 | 0.04 | 0.08 | 0.25 | 0.14 | 0.04 | 0.00 | 0.10 |
| Q8GUQ5 | 1.00 | 0.13 | 0.46 | 0.50 | 0.50 | 0.25 | 0.50 | 0.28 | 0.50 | 0.13 | 0.05 | 0.18 |
| Q8GW72 | 0.13 | 0.55 | 0.32 | 0.17 | 0.09 | 1.00 | 0.04 | 0.13 | 0.15 | 0.09 | 0.01 | 0.62 |
| Q8GWZ6 | 0.02 | 0.02 | 0.50 | 0.77 | 0.17 | 0.17 | 0.02 | 0.14 | 1.00 | 0.00 | 0.00 | 0.02 |
| Q8GXR9 | 0.24 | 0.03 | 0.85 | 0.17 | 0.12 | 0.01 | 0.08 | 1.00 | 0.03 | 0.08 | 0.12 | 0.10 |
| Q8GXV7 | 0.29 | 1.00 | 0.14 | 0.33 | 0.18 | 0.42 | 0.50 | 0.27 | 0.67 | 0.04 | 0.00 | 0.16 |
| Q8GYE0 | 0.52 | 0.07 | 0.14 | 0.33 | 1.00 | 0.00 | 0.50 | 0.32 | 0.49 | 0.03 | 0.00 | 0.33 |
| Q8GYJ3 | 0.07 | 0.04 | 0.12 | 0.77 | 0.10 | 0.00 | 0.05 | 0.09 | 1.00 | 0.02 | 0.00 | 0.04 |
| Q8GYN5 | 0.52 | 0.10 | 0.10 | 1.00 | 0.50 | 0.12 | 0.08 | 0.25 | 0.50 | 0.03 | 0.00 | 0.20 |
| Q8GZ17 | 1.00 | 0.33 | 0.11 | 0.25 | 0.79 | 0.22 | 0.80 | 0.25 | 0.50 | 0.04 | 0.00 | 0.22 |
| Q8GZA8 | 0.02 | 0.02 | 0.19 | 0.77 | 0.05 | 0.00 | 0.02 | 0.09 | 0.85 | 0.00 | 0.06 | 0.02 |
| Q8H166 | 0.50 | 0.13 | 0.16 | 0.17 | 0.14 | 0.69 | 0.50 | 0.20 | 0.29 | 0.01 | 0.04 | 0.62 |
| Q8H1Z0 | 0.52 | 0.05 | 0.31 | 0.33 | 0.90 | 0.01 | 0.12 | 0.33 | 0.33 | 0.15 | 0.08 | 1.00 |
| Q8HSW1 | 0.08 | 0.02 | 1.00 | 0.77 | 0.04 | 0.01 | 0.02 | 0.28 | 0.22 | 0.03 | 0.05 | 0.04 |
| Q8HUH1 | 0.01 | 0.01 | 0.85 | 0.20 | 0.01 | 0.00 | 0.00 | 0.71 | 0.04 | 0.01 | 0.26 | 0.01 |
| Q8L3X9 | 0.08 | 0.09 | 0.67 | 0.40 | 0.08 | 0.10 | 0.02 | 0.89 | 0.13 | 0.24 | 0.14 | 0.10 |
| Q8L4H0 | 0.25 | 0.10 | 0.46 | 0.44 | 0.05 | 0.01 | 0.05 | 0.28 | 1.00 | 0.03 | 0.05 | 0.05 |
| Q8L586 | 0.40 | 0.03 | 0.10 | 0.12 | 0.90 | 0.00 | 0.12 | 0.26 | 0.03 | 0.03 | 0.00 | 0.15 |
| Q8L6J3 | 0.02 | 0.02 | 0.85 | 0.24 | 0.04 | 0.01 | 0.02 | 0.89 | 0.70 | 0.03 | 0.31 | 0.02 |
| Q8L770 | 0.13 | 0.13 | 0.85 | 0.13 | 0.25 | 0.06 | 0.03 | 0.25 | 0.10 | 0.01 | 0.13 | 0.13 |
| Q8L785 | 0.08 | 0.08 | 0.88 | 0.77 | 0.04 | 0.00 | 0.02 | 1.00 | 0.50 | 0.08 | 0.20 | 0.08 |
| Q8L940 | 1.00 | 0.09 | 0.56 | 0.77 | 0.12 | 0.25 | 0.08 | 0.47 | 0.49 | 0.50 | 0.03 | 0.10 |
| Q8LAD0 | 0.50 | 0.25 | 0.50 | 1.00 | 0.04 | 0.25 | 0.03 | 0.16 | 0.46 | 0.06 | 0.03 | 0.12 |
| Q8LB02 | 0.24 | 0.03 | 0.53 | 0.24 | 0.12 | 0.01 | 0.08 | 1.00 | 0.32 | 0.24 | 0.03 | 0.10 |
| Q8LBI1 | 0.52 | 0.10 | 0.85 | 1.00 | 0.13 | 0.04 | 0.38 | 0.40 | 1.00 | 0.06 | 0.31 | 0.62 |
| Q8LBL1 | 0.50 | 0.40 | 0.27 | 0.50 | 0.22 | 0.30 | 0.12 | 0.48 | 0.50 | 0.04 | 0.02 | 1.00 |
| Q8LCS8 | 0.52 | 0.05 | 0.10 | 0.25 | 0.12 | 0.00 | 0.08 | 0.25 | 0.07 | 0.03 | 0.00 | 0.10 |
| Q8LCU7 | 0.08 | 0.05 | 0.85 | 0.24 | 0.08 | 0.01 | 0.00 | 1.00 | 0.84 | 0.24 | 0.14 | 0.10 |
| Q8LDP4 | 0.33 | 0.55 | 0.45 | 1.00 | 1.00 | 0.42 | 0.38 | 0.33 | 0.49 | 0.05 | 0.00 | 0.33 |
| Q8LEA8 | 0.27 | 0.02 | 0.09 | 0.57 | 0.03 | 0.00 | 0.05 | 0.09 | 1.00 | 0.02 | 0.00 | 0.18 |
| Q8LG50 | 0.24 | 0.09 | 0.41 | 0.40 | 1.00 | 0.10 | 0.12 | 0.50 | 0.79 | 0.15 | 0.08 | 0.15 |
| Q8LG77 | 0.04 | 0.02 | 0.61 | 0.33 | 0.08 | 0.01 | 0.01 | 1.00 | 0.18 | 0.24 | 0.06 | 0.05 |
| Q8LG88 | 0.50 | 0.04 | 0.23 | 0.13 | 0.18 | 0.04 | 0.12 | 0.27 | 0.03 | 0.04 | 0.00 | 1.00 |
| Q8LGD5 | 0.12 | 0.10 | 0.08 | 0.26 | 0.05 | 0.12 | 0.05 | 0.09 | 1.00 | 0.02 | 0.00 | 0.17 |
| Q8LGE3 | 0.12 | 0.10 | 0.09 | 1.00 | 0.05 | 0.12 | 0.05 | 0.20 | 1.00 | 0.02 | 0.00 | 0.17 |
| Q8LGI2 | 0.52 | 0.05 | 0.74 | 0.25 | 0.12 | 0.04 | 0.08 | 0.93 | 0.07 | 0.08 | 0.03 | 0.62 |
| Q8LJT8 | 0.07 | 0.02 | 0.19 | 0.26 | 0.03 | 0.00 | 0.05 | 0.09 | 1.00 | 0.02 | 0.06 | 0.04 |
| Q8LK56 | 0.13 | 0.13 | 0.53 | 0.33 | 0.04 | 0.12 | 0.03 | 0.37 | 1.00 | 0.09 | 0.06 | 0.12 |
| Q8LPT9 | 0.09 | 0.18 | 1.00 | 0.24 | 0.04 | 0.18 | 0.02 | 0.28 | 0.18 | 0.09 | 0.12 | 0.11 |
| Q8LPU4 | 0.02 | 0.02 | 0.41 | 1.00 | 0.07 | 0.01 | 0.02 | 0.27 | 1.00 | 0.07 | 0.05 | 0.07 |
| Q8MA04 | 0.01 | 0.01 | 0.85 | 0.14 | 0.01 | 0.02 | 0.00 | 0.09 | 0.13 | 0.01 | 0.25 | 0.01 |
| Q8RUW5 | 0.17 | 0.10 | 0.50 | 0.33 | 0.10 | 0.50 | 0.17 | 0.27 | 0.13 | 0.07 | 0.05 | 1.00 |
| Q8RVQ9 | 0.15 | 0.10 | 0.19 | 0.50 | 0.05 | 0.00 | 0.05 | 0.13 | 1.00 | 0.02 | 0.05 | 0.05 |

|        |      |      |      |      |      |      |      |      |      |      |      |      |
|--------|------|------|------|------|------|------|------|------|------|------|------|------|
| Q8RXL8 | 0.38 | 0.09 | 0.25 | 0.25 | 0.18 | 0.00 | 1.00 | 0.26 | 0.04 | 0.03 | 0.00 | 0.26 |
| Q8RY95 | 0.52 | 0.05 | 0.27 | 0.77 | 0.13 | 0.06 | 0.05 | 0.18 | 1.00 | 0.02 | 0.06 | 0.08 |
| Q8RY99 | 0.08 | 0.02 | 0.35 | 0.36 | 0.09 | 0.00 | 0.01 | 1.00 | 0.81 | 0.02 | 0.05 | 0.04 |
| Q8S307 | 0.40 | 0.04 | 0.33 | 0.44 | 0.03 | 0.20 | 0.05 | 0.33 | 1.00 | 0.04 | 0.06 | 0.04 |
| Q8S3N1 | 0.06 | 0.03 | 0.41 | 1.00 | 0.05 | 0.01 | 0.02 | 0.44 | 1.00 | 0.03 | 0.05 | 0.05 |
| Q8S944 | 0.13 | 0.13 | 0.35 | 0.50 | 0.13 | 0.12 | 0.17 | 0.89 | 0.64 | 0.84 | 0.09 | 0.12 |
| Q8S9K3 | 0.07 | 0.03 | 1.00 | 0.26 | 0.04 | 0.01 | 0.05 | 0.44 | 0.49 | 0.02 | 0.12 | 0.05 |
| Q8SAY0 | 0.01 | 0.01 | 0.85 | 0.50 | 0.01 | 0.02 | 0.00 | 0.20 | 0.50 | 0.01 | 0.31 | 0.01 |
| Q8VWG3 | 0.08 | 0.55 | 0.30 | 0.24 | 0.04 | 0.42 | 0.02 | 0.18 | 1.00 | 0.02 | 0.06 | 0.25 |
| Q8VXU6 | 0.02 | 0.02 | 0.09 | 1.00 | 0.50 | 0.00 | 0.02 | 0.05 | 0.22 | 0.00 | 0.00 | 0.02 |
| Q8VY06 | 0.13 | 0.20 | 0.88 | 0.33 | 0.10 | 0.12 | 0.04 | 0.95 | 0.20 | 0.09 | 0.12 | 0.13 |
| Q8VY26 | 0.60 | 0.02 | 1.00 | 0.57 | 0.20 | 0.01 | 0.13 | 0.31 | 0.63 | 0.50 | 0.12 | 0.20 |
| Q8VY97 | 0.40 | 0.20 | 0.10 | 0.20 | 1.00 | 0.20 | 0.12 | 0.26 | 0.03 | 0.03 | 0.00 | 0.20 |
| Q8VYE2 | 0.24 | 0.07 | 0.14 | 0.25 | 0.25 | 0.00 | 0.21 | 1.00 | 0.25 | 0.03 | 0.00 | 0.16 |
| Q8VYI9 | 0.95 | 0.33 | 0.10 | 0.25 | 0.12 | 0.00 | 0.13 | 0.25 | 0.13 | 0.03 | 0.00 | 0.10 |
| Q8VYK7 | 0.24 | 0.07 | 0.14 | 1.00 | 0.12 | 0.04 | 0.33 | 0.32 | 0.49 | 0.04 | 0.00 | 1.00 |
| Q8VYM2 | 1.00 | 0.05 | 0.14 | 0.33 | 0.50 | 0.00 | 0.12 | 0.27 | 0.49 | 0.03 | 0.00 | 0.26 |
| Q8VYN6 | 0.08 | 0.09 | 0.85 | 0.50 | 0.04 | 0.10 | 0.02 | 0.28 | 0.18 | 0.09 | 0.12 | 0.06 |
| Q8W037 | 0.52 | 0.05 | 0.23 | 0.25 | 1.00 | 0.00 | 0.12 | 0.27 | 0.75 | 0.03 | 0.00 | 0.25 |
| Q8W1K8 | 0.01 | 0.01 | 0.04 | 0.24 | 0.02 | 0.00 | 0.00 | 0.02 | 0.84 | 0.00 | 0.00 | 0.01 |
| Q8W2B8 | 0.05 | 0.04 | 0.79 | 0.77 | 0.07 | 0.01 | 0.03 | 0.40 | 0.22 | 0.07 | 0.05 | 0.07 |
| Q8W420 | 0.27 | 0.04 | 0.20 | 0.77 | 0.18 | 0.01 | 0.05 | 0.20 | 1.00 | 0.04 | 0.00 | 0.04 |
| Q8W486 | 0.38 | 0.14 | 0.36 | 0.77 | 0.18 | 0.00 | 0.92 | 0.26 | 0.22 | 0.03 | 0.00 | 0.15 |
| Q8W487 | 0.02 | 0.00 | 0.07 | 0.05 | 0.01 | 0.00 | 0.00 | 0.95 | 0.01 | 0.02 | 0.00 | 0.01 |
| Q8W575 | 0.07 | 0.04 | 0.17 | 1.00 | 0.05 | 0.01 | 0.05 | 0.16 | 1.00 | 0.04 | 0.00 | 0.04 |
| Q8W5S1 | 0.25 | 0.10 | 0.25 | 1.00 | 0.22 | 0.07 | 0.05 | 0.33 | 1.00 | 0.02 | 0.00 | 0.22 |
| Q8WHX7 | 0.24 | 0.04 | 0.85 | 0.17 | 0.18 | 0.01 | 0.12 | 0.50 | 0.04 | 0.08 | 0.12 | 0.16 |
| Q93WK5 | 0.17 | 0.01 | 0.19 | 0.53 | 0.17 | 0.00 | 0.00 | 0.89 | 1.00 | 0.02 | 0.06 | 0.01 |
| Q93WX6 | 0.08 | 0.04 | 1.00 | 0.24 | 0.04 | 0.04 | 0.02 | 0.50 | 0.13 | 0.50 | 0.12 | 0.08 |
| Q93XM7 | 0.24 | 0.04 | 0.85 | 0.12 | 0.18 | 0.00 | 0.12 | 1.00 | 0.03 | 0.03 | 0.12 | 0.16 |
| Q93XX5 | 1.00 | 0.11 | 0.30 | 0.33 | 0.12 | 0.00 | 0.08 | 0.25 | 0.07 | 0.15 | 0.08 | 0.10 |
| Q93Y32 | 0.07 | 0.09 | 0.42 | 0.33 | 0.04 | 0.10 | 0.05 | 1.00 | 0.49 | 0.09 | 0.05 | 0.06 |
| Q93Y52 | 0.20 | 0.13 | 0.88 | 0.77 | 0.12 | 0.12 | 0.20 | 0.50 | 0.29 | 0.04 | 0.12 | 0.20 |
| Q93YW0 | 0.01 | 0.00 | 1.00 | 0.02 | 0.01 | 0.00 | 0.00 | 0.09 | 0.02 | 0.01 | 0.12 | 0.01 |
| Q93ZG7 | 0.52 | 0.50 | 0.51 | 1.00 | 0.13 | 0.12 | 0.10 | 0.45 | 0.84 | 0.04 | 0.21 | 0.16 |
| Q93ZN9 | 0.11 | 0.05 | 1.00 | 0.44 | 0.04 | 0.04 | 0.03 | 0.73 | 0.50 | 0.09 | 0.12 | 0.10 |
| Q940M2 | 0.24 | 0.08 | 0.50 | 0.40 | 0.13 | 0.08 | 0.08 | 1.00 | 0.32 | 0.50 | 0.10 | 0.41 |
| Q941R4 | 0.24 | 0.09 | 0.14 | 0.25 | 0.18 | 0.00 | 1.00 | 0.27 | 0.04 | 0.03 | 0.00 | 0.16 |
| Q943Z6 | 0.02 | 0.02 | 0.51 | 1.00 | 0.50 | 0.02 | 0.02 | 0.16 | 0.22 | 0.00 | 0.21 | 0.02 |
| Q944C1 | 1.00 | 0.13 | 0.30 | 1.00 | 0.33 | 0.12 | 0.08 | 0.25 | 0.36 | 0.15 | 0.08 | 0.50 |
| Q944I4 | 0.11 | 0.09 | 1.00 | 0.44 | 0.04 | 0.10 | 0.03 | 0.30 | 0.20 | 0.67 | 0.12 | 0.06 |
| Q946J8 | 0.20 | 0.02 | 0.85 | 0.60 | 0.05 | 0.00 | 0.05 | 0.09 | 1.00 | 0.02 | 0.06 | 0.04 |
| Q946Y7 | 0.24 | 0.50 | 0.20 | 0.40 | 0.20 | 0.00 | 1.00 | 0.32 | 0.49 | 0.03 | 0.00 | 0.20 |
| Q948J9 | 0.02 | 0.02 | 1.00 | 0.77 | 0.33 | 0.01 | 0.02 | 0.27 | 0.22 | 0.07 | 0.12 | 0.07 |
| Q948U0 | 1.00 | 0.05 | 0.31 | 0.38 | 0.18 | 0.08 | 0.12 | 0.31 | 0.18 | 0.17 | 0.03 | 0.23 |
| Q949J1 | 0.20 | 0.13 | 0.61 | 0.77 | 0.04 | 0.12 | 0.20 | 0.89 | 0.22 | 0.02 | 0.04 | 0.20 |

|        |      |      |      |      |      |      |      |      |      |      |      |      |
|--------|------|------|------|------|------|------|------|------|------|------|------|------|
| Q949U1 | 0.24 | 0.03 | 0.40 | 0.33 | 1.00 | 0.01 | 0.12 | 0.33 | 0.18 | 0.13 | 0.20 | 0.17 |
| Q94A28 | 0.24 | 0.09 | 0.85 | 0.50 | 0.08 | 0.10 | 0.03 | 1.00 | 0.20 | 0.57 | 0.03 | 0.08 |
| Q94AA4 | 0.08 | 0.09 | 0.67 | 1.00 | 0.04 | 0.10 | 0.03 | 0.28 | 0.22 | 0.09 | 0.05 | 0.06 |
| Q94AH6 | 0.31 | 0.14 | 0.42 | 1.00 | 0.15 | 0.01 | 0.50 | 0.16 | 1.00 | 0.08 | 0.00 | 0.18 |
| Q94BT2 | 0.95 | 0.05 | 0.31 | 0.25 | 0.15 | 0.01 | 0.08 | 0.31 | 0.54 | 0.08 | 0.03 | 0.10 |
| Q94BZ7 | 0.08 | 0.02 | 0.67 | 0.36 | 0.05 | 0.01 | 0.05 | 1.00 | 0.75 | 0.05 | 0.05 | 0.05 |
| Q94CC0 | 0.40 | 0.03 | 0.15 | 0.38 | 0.90 | 0.08 | 0.12 | 0.26 | 0.03 | 0.03 | 0.00 | 0.23 |
| Q94CD8 | 0.95 | 0.33 | 0.32 | 0.26 | 0.12 | 0.38 | 0.08 | 0.25 | 0.24 | 0.09 | 0.01 | 0.25 |
| Q94CL9 | 0.07 | 0.04 | 0.12 | 0.28 | 0.10 | 0.00 | 0.05 | 0.09 | 1.00 | 0.02 | 0.00 | 0.04 |
| Q94EG3 | 0.08 | 0.55 | 0.40 | 0.38 | 0.21 | 0.42 | 0.02 | 0.31 | 0.18 | 0.08 | 0.03 | 0.64 |
| Q94F08 | 1.00 | 0.18 | 0.70 | 0.25 | 0.12 | 0.18 | 0.08 | 0.31 | 0.07 | 0.09 | 0.03 | 0.11 |
| Q94FY8 | 0.01 | 0.00 | 1.00 | 0.02 | 0.01 | 0.00 | 0.00 | 0.09 | 0.02 | 0.01 | 0.12 | 0.01 |
| Q94IC4 | 0.33 | 0.02 | 1.00 | 0.77 | 0.33 | 0.01 | 0.02 | 0.33 | 0.22 | 0.08 | 0.50 | 0.17 |
| Q94JU3 | 0.07 | 0.04 | 0.17 | 1.00 | 0.05 | 0.01 | 0.05 | 0.16 | 1.00 | 0.04 | 0.00 | 0.04 |
| Q94JY4 | 0.52 | 0.50 | 0.50 | 1.00 | 0.13 | 0.00 | 0.11 | 0.13 | 0.49 | 0.13 | 0.00 | 0.08 |
| Q94KE2 | 0.01 | 0.01 | 0.13 | 0.25 | 0.02 | 0.00 | 0.00 | 0.02 | 0.88 | 0.00 | 0.00 | 0.01 |
| Q94KU5 | 0.01 | 0.00 | 0.85 | 0.02 | 0.01 | 0.00 | 0.00 | 0.09 | 0.02 | 0.01 | 0.12 | 0.01 |
| Q96247 | 1.00 | 0.09 | 0.20 | 1.00 | 0.33 | 0.00 | 0.50 | 0.27 | 0.80 | 0.03 | 0.00 | 0.20 |
| Q96252 | 0.24 | 0.04 | 0.14 | 0.21 | 0.12 | 0.04 | 0.10 | 1.00 | 0.32 | 0.03 | 0.00 | 0.28 |
| Q96255 | 0.11 | 0.04 | 1.00 | 0.44 | 0.04 | 0.04 | 0.03 | 0.33 | 0.20 | 0.09 | 0.12 | 0.05 |
| Q96291 | 0.11 | 0.33 | 1.00 | 0.44 | 0.12 | 0.37 | 0.05 | 0.31 | 0.50 | 0.17 | 0.12 | 0.06 |
| Q96301 | 0.33 | 0.14 | 0.41 | 1.00 | 0.50 | 0.01 | 0.29 | 0.16 | 1.00 | 0.04 | 0.05 | 0.07 |
| Q96329 | 0.08 | 0.09 | 0.42 | 0.44 | 0.08 | 0.10 | 0.03 | 0.60 | 0.33 | 1.00 | 0.12 | 0.14 |
| Q96529 | 0.08 | 0.33 | 1.00 | 0.44 | 0.08 | 0.37 | 0.08 | 0.50 | 0.20 | 0.04 | 0.12 | 0.08 |
| Q9ASY8 | 0.24 | 0.07 | 0.14 | 0.25 | 0.18 | 0.00 | 0.21 | 1.00 | 0.04 | 0.03 | 0.00 | 0.16 |
| Q9ATB4 | 0.11 | 0.03 | 0.44 | 0.50 | 0.11 | 0.01 | 0.06 | 0.44 | 1.00 | 0.06 | 0.06 | 0.05 |
| Q9C519 | 0.14 | 0.02 | 0.19 | 0.33 | 0.14 | 0.00 | 0.05 | 0.09 | 1.00 | 0.02 | 0.06 | 0.08 |
| Q9C5W3 | 0.20 | 0.10 | 0.85 | 0.50 | 0.04 | 0.10 | 0.02 | 0.28 | 0.30 | 0.09 | 0.12 | 0.30 |
| Q9C5X3 | 0.52 | 0.14 | 0.17 | 1.00 | 0.12 | 0.04 | 0.56 | 0.32 | 0.71 | 0.04 | 0.00 | 0.62 |
| Q9C5X4 | 0.52 | 0.05 | 0.50 | 1.00 | 0.07 | 0.01 | 0.05 | 0.44 | 1.00 | 0.03 | 0.05 | 0.08 |
| Q9C6I6 | 0.09 | 0.05 | 0.31 | 0.17 | 0.07 | 0.07 | 0.00 | 1.00 | 0.01 | 0.14 | 0.03 | 0.14 |
| Q9C7F7 | 0.95 | 0.65 | 0.10 | 0.26 | 0.79 | 0.42 | 0.38 | 0.25 | 0.24 | 0.03 | 0.00 | 0.50 |
| Q9C801 | 0.12 | 0.10 | 0.51 | 0.26 | 0.12 | 0.12 | 0.00 | 0.17 | 1.00 | 0.00 | 0.21 | 0.17 |
| Q9C826 | 0.13 | 0.17 | 0.31 | 1.00 | 0.17 | 0.07 | 0.03 | 0.45 | 0.53 | 0.08 | 0.03 | 0.17 |
| Q9C895 | 0.18 | 0.03 | 0.41 | 0.50 | 0.13 | 0.01 | 0.13 | 0.44 | 1.00 | 0.03 | 0.05 | 0.05 |
| Q9C8G9 | 0.75 | 0.21 | 0.50 | 0.26 | 0.18 | 0.12 | 0.12 | 0.58 | 0.49 | 0.04 | 0.03 | 1.00 |
| Q9C9C9 | 0.02 | 0.02 | 0.50 | 1.00 | 0.33 | 0.01 | 0.02 | 0.13 | 0.22 | 0.03 | 0.05 | 0.02 |
| Q9C9E3 | 0.14 | 0.10 | 0.33 | 0.33 | 0.05 | 0.14 | 0.05 | 0.09 | 1.00 | 0.14 | 0.06 | 0.17 |
| Q9C9H5 | 0.52 | 0.76 | 0.38 | 0.44 | 0.09 | 0.42 | 0.38 | 0.21 | 0.20 | 0.09 | 0.01 | 0.30 |
| Q9CA19 | 0.05 | 0.04 | 0.85 | 0.44 | 0.03 | 0.02 | 0.03 | 0.89 | 0.43 | 0.04 | 0.31 | 0.04 |
| Q9CAF5 | 0.43 | 0.08 | 1.00 | 0.33 | 0.15 | 0.00 | 0.10 | 0.28 | 0.49 | 0.08 | 0.12 | 0.29 |
| Q9CAF6 | 0.08 | 0.02 | 1.00 | 0.36 | 0.05 | 0.00 | 0.05 | 1.00 | 0.85 | 0.05 | 0.12 | 0.05 |
| Q9FE64 | 0.08 | 0.20 | 0.46 | 0.38 | 0.03 | 0.00 | 0.09 | 1.00 | 0.10 | 0.02 | 0.20 | 0.03 |
| Q9FEF8 | 0.24 | 0.05 | 0.63 | 0.63 | 0.12 | 0.02 | 0.08 | 0.25 | 1.00 | 0.05 | 0.25 | 0.10 |
| Q9FEW9 | 0.08 | 0.04 | 0.44 | 0.50 | 0.20 | 0.04 | 0.00 | 0.31 | 0.14 | 0.84 | 0.19 | 0.10 |
| Q9FF80 | 0.04 | 0.03 | 0.41 | 0.63 | 0.04 | 0.01 | 0.02 | 0.44 | 1.00 | 0.03 | 0.05 | 0.05 |

|         |      |      |      |      |      |      |      |      |      |      |      |      |
|---------|------|------|------|------|------|------|------|------|------|------|------|------|
| Q9FGN8  | 0.01 | 0.01 | 0.05 | 0.40 | 0.05 | 0.00 | 0.02 | 0.02 | 1.00 | 0.00 | 0.00 | 0.01 |
| Q9FHD4  | 0.95 | 0.11 | 0.10 | 0.25 | 0.40 | 0.00 | 0.08 | 0.25 | 0.07 | 0.03 | 0.00 | 0.10 |
| Q9FHN6  | 0.95 | 0.50 | 0.31 | 0.25 | 0.12 | 0.04 | 0.08 | 0.73 | 0.18 | 0.08 | 0.03 | 0.10 |
| Q9FIE3  | 0.07 | 0.02 | 0.27 | 0.26 | 0.25 | 0.06 | 0.05 | 0.18 | 1.00 | 0.02 | 0.06 | 0.05 |
| Q9FJ62  | 1.00 | 0.76 | 0.30 | 0.33 | 0.12 | 0.19 | 0.10 | 0.25 | 0.33 | 0.15 | 0.08 | 0.12 |
| Q9FK12  | 0.27 | 0.02 | 0.19 | 1.00 | 0.17 | 0.00 | 0.05 | 0.09 | 0.85 | 0.02 | 0.06 | 0.18 |
| Q9FL76  | 0.24 | 1.00 | 0.10 | 0.20 | 0.12 | 0.42 | 0.10 | 0.25 | 0.03 | 0.03 | 0.00 | 0.10 |
| Q9FLN4  | 0.11 | 0.01 | 0.88 | 0.20 | 0.02 | 0.00 | 0.00 | 0.33 | 0.17 | 0.06 | 0.21 | 0.04 |
| Q9FM65  | 0.95 | 0.65 | 0.20 | 0.25 | 0.12 | 0.17 | 0.08 | 0.25 | 0.60 | 0.03 | 0.00 | 0.10 |
| Q9FMF5  | 1.00 | 0.05 | 0.10 | 0.67 | 0.33 | 0.00 | 0.17 | 0.25 | 0.88 | 0.03 | 0.00 | 0.10 |
| Q9FML6  | 0.02 | 0.02 | 0.51 | 1.00 | 0.02 | 0.02 | 0.02 | 0.26 | 0.22 | 0.00 | 0.26 | 0.02 |
| Q9FN42  | 0.13 | 0.20 | 0.67 | 0.21 | 0.25 | 0.12 | 0.06 | 1.00 | 0.32 | 0.02 | 0.20 | 0.13 |
| Q9FN52  | 0.05 | 0.04 | 1.00 | 0.33 | 0.33 | 0.04 | 0.02 | 0.33 | 0.13 | 0.50 | 0.12 | 0.05 |
| Q9FN69  | 0.33 | 0.02 | 0.50 | 0.50 | 0.05 | 0.00 | 0.05 | 0.17 | 1.00 | 0.02 | 0.17 | 0.04 |
| Q9FNC9  | 0.24 | 0.11 | 0.84 | 0.25 | 0.25 | 0.00 | 0.56 | 1.00 | 0.04 | 0.04 | 0.12 | 0.41 |
| Q9FQ20  | 0.04 | 0.10 | 0.15 | 0.35 | 0.05 | 0.00 | 0.00 | 0.17 | 1.00 | 0.00 | 0.00 | 0.05 |
| Q9FRK5  | 0.24 | 0.03 | 0.10 | 0.13 | 0.79 | 0.04 | 0.12 | 0.26 | 0.03 | 0.04 | 0.00 | 0.62 |
| Q9FS16  | 0.19 | 1.00 | 0.05 | 0.20 | 0.02 | 0.42 | 0.10 | 0.11 | 0.02 | 0.00 | 0.00 | 0.06 |
| Q9FT52  | 0.24 | 0.13 | 0.85 | 0.75 | 0.12 | 0.12 | 0.38 | 1.00 | 0.60 | 0.05 | 0.21 | 0.41 |
| Q9FT54  | 0.01 | 0.01 | 0.18 | 0.40 | 0.05 | 0.00 | 0.02 | 0.03 | 1.00 | 0.00 | 0.06 | 0.01 |
| Q9FU Y2 | 0.60 | 0.50 | 0.50 | 0.40 | 0.25 | 0.14 | 0.06 | 0.50 | 1.00 | 0.14 | 0.06 | 0.20 |
| Q9FV49  | 0.13 | 0.13 | 0.33 | 0.77 | 0.10 | 0.12 | 0.04 | 0.25 | 0.22 | 0.02 | 0.04 | 0.13 |
| Q9FV50  | 0.13 | 0.13 | 0.85 | 0.50 | 0.13 | 0.12 | 0.04 | 0.89 | 0.38 | 0.02 | 0.12 | 0.13 |
| Q9FV52  | 0.13 | 0.13 | 0.85 | 0.50 | 0.10 | 0.12 | 0.04 | 0.89 | 0.18 | 0.02 | 0.12 | 0.13 |
| Q9FVL0  | 0.07 | 0.02 | 0.50 | 0.77 | 0.13 | 0.01 | 0.02 | 0.27 | 1.00 | 0.13 | 0.02 | 0.05 |
| Q9FVU9  | 0.13 | 0.20 | 0.27 | 1.00 | 0.11 | 0.12 | 0.06 | 0.40 | 1.00 | 0.02 | 0.04 | 0.13 |
| Q9FVX0  | 0.07 | 0.10 | 0.15 | 1.00 | 0.05 | 0.00 | 0.05 | 0.09 | 0.84 | 0.02 | 0.00 | 0.05 |
| Q9FWS4  | 0.11 | 0.01 | 0.88 | 0.20 | 0.02 | 0.02 | 0.00 | 0.20 | 0.08 | 0.04 | 0.31 | 0.04 |
| Q9FXE5  | 0.27 | 0.55 | 0.32 | 0.17 | 0.04 | 1.00 | 0.03 | 0.13 | 0.15 | 0.09 | 0.01 | 0.21 |
| Q9FY99  | 0.09 | 0.18 | 0.88 | 0.75 | 0.11 | 0.18 | 0.02 | 0.31 | 0.02 | 0.08 | 0.12 | 0.11 |
| Q9FYA6  | 0.05 | 0.09 | 0.85 | 0.33 | 0.04 | 0.10 | 0.02 | 0.33 | 0.13 | 0.09 | 0.12 | 0.06 |
| Q9FZ33  | 0.60 | 0.03 | 0.20 | 0.22 | 1.00 | 0.00 | 0.12 | 0.89 | 0.50 | 0.04 | 0.00 | 0.41 |
| Q9FZF1  | 0.24 | 0.07 | 0.10 | 0.40 | 0.18 | 0.00 | 0.12 | 0.33 | 0.49 | 1.00 | 0.00 | 0.15 |
| Q9GCB9  | 0.02 | 0.01 | 0.48 | 0.20 | 0.01 | 0.00 | 0.00 | 0.89 | 0.04 | 0.02 | 0.26 | 0.01 |
| Q9LDC0  | 0.52 | 0.10 | 0.45 | 0.67 | 0.79 | 0.04 | 0.12 | 0.26 | 0.54 | 0.05 | 0.00 | 0.62 |
| Q9LDD8  | 0.08 | 0.03 | 0.42 | 0.21 | 0.04 | 0.00 | 0.01 | 1.00 | 0.32 | 0.04 | 0.08 | 0.04 |
| Q9LDU6  | 0.52 | 0.09 | 0.31 | 0.50 | 1.00 | 0.01 | 0.38 | 0.50 | 0.49 | 0.15 | 0.08 | 0.15 |
| Q9LE95  | 0.01 | 0.01 | 0.85 | 0.18 | 0.01 | 0.02 | 0.00 | 0.20 | 0.08 | 0.01 | 0.31 | 0.01 |
| Q9LEK8  | 0.33 | 0.02 | 0.45 | 0.77 | 0.33 | 0.00 | 0.05 | 0.09 | 0.84 | 0.05 | 0.00 | 0.33 |
| Q9LER7  | 0.11 | 0.00 | 1.00 | 0.18 | 0.17 | 0.17 | 0.06 | 0.22 | 0.17 | 0.04 | 0.20 | 0.04 |
| Q9LEV3  | 0.15 | 0.00 | 0.40 | 0.30 | 0.11 | 0.04 | 0.00 | 0.91 | 0.19 | 0.02 | 0.00 | 0.07 |
| Q9LF79  | 0.60 | 0.21 | 0.67 | 0.26 | 0.33 | 0.12 | 0.12 | 0.58 | 0.49 | 0.04 | 0.03 | 0.33 |
| Q9LG26  | 0.25 | 0.13 | 0.80 | 1.00 | 0.13 | 0.33 | 0.03 | 0.89 | 1.00 | 0.02 | 0.21 | 0.33 |
| Q9LHE5  | 0.35 | 0.07 | 0.14 | 0.26 | 0.25 | 0.00 | 0.21 | 1.00 | 0.49 | 0.04 | 0.00 | 0.41 |
| Q9LHS9  | 0.04 | 0.02 | 0.30 | 0.40 | 0.06 | 0.06 | 0.02 | 0.18 | 1.00 | 0.02 | 0.06 | 0.05 |
| Q9LIG6  | 0.02 | 0.00 | 0.47 | 0.05 | 0.33 | 0.00 | 0.00 | 1.00 | 0.11 | 0.02 | 0.00 | 0.17 |

|        |      |      |      |      |      |      |      |      |      |      |      |      |
|--------|------|------|------|------|------|------|------|------|------|------|------|------|
| Q9LJD7 | 0.07 | 0.02 | 0.08 | 0.57 | 0.03 | 0.00 | 0.05 | 0.09 | 1.00 | 0.02 | 0.00 | 0.04 |
| Q9LK23 | 0.09 | 0.18 | 0.85 | 0.77 | 0.11 | 0.18 | 0.03 | 0.50 | 0.22 | 0.08 | 0.03 | 0.11 |
| Q9LK31 | 0.38 | 0.09 | 0.10 | 0.77 | 0.18 | 0.00 | 1.00 | 0.50 | 0.67 | 0.03 | 0.00 | 0.15 |
| Q9LKA5 | 0.07 | 0.02 | 0.85 | 0.26 | 0.03 | 0.00 | 0.05 | 1.00 | 0.49 | 0.02 | 0.12 | 0.04 |
| Q9LKW9 | 1.00 | 0.05 | 0.74 | 0.33 | 0.18 | 0.04 | 0.25 | 0.63 | 0.67 | 0.20 | 0.00 | 0.67 |
| Q9LN63 | 0.40 | 0.02 | 0.19 | 1.00 | 0.03 | 0.20 | 0.05 | 0.09 | 0.85 | 0.02 | 0.06 | 0.04 |
| Q9LPM9 | 0.05 | 0.09 | 0.83 | 1.00 | 0.04 | 0.10 | 0.03 | 0.33 | 0.22 | 0.09 | 0.05 | 0.06 |
| Q9LQI7 | 0.02 | 0.00 | 0.07 | 0.05 | 0.01 | 0.00 | 0.00 | 0.89 | 0.01 | 0.02 | 0.00 | 0.01 |
| Q9LQL0 | 0.02 | 0.00 | 0.85 | 0.05 | 0.01 | 0.00 | 0.00 | 1.00 | 0.02 | 0.02 | 0.02 | 0.01 |
| Q9LQU4 | 0.52 | 0.05 | 0.10 | 0.25 | 0.18 | 0.00 | 0.12 | 0.47 | 0.07 | 0.12 | 0.00 | 0.15 |
| Q9LR78 | 0.20 | 0.13 | 0.27 | 0.50 | 0.25 | 0.12 | 0.05 | 0.25 | 1.00 | 0.02 | 0.02 | 0.12 |
| Q9LRE6 | 0.13 | 0.13 | 0.61 | 0.33 | 0.04 | 0.14 | 0.03 | 0.37 | 1.00 | 0.03 | 0.28 | 0.12 |
| Q9LRY0 | 0.07 | 0.04 | 0.12 | 0.28 | 0.10 | 0.00 | 0.05 | 0.09 | 1.00 | 0.02 | 0.00 | 0.04 |
| Q9LS01 | 0.52 | 0.05 | 1.00 | 0.36 | 0.12 | 0.04 | 0.08 | 0.33 | 0.50 | 0.75 | 0.12 | 0.41 |
| Q9LS42 | 0.38 | 0.50 | 0.14 | 0.25 | 0.18 | 0.00 | 1.00 | 0.27 | 0.04 | 0.03 | 0.00 | 0.16 |
| Q9LSW8 | 0.09 | 0.04 | 0.50 | 0.44 | 0.06 | 0.01 | 0.03 | 1.00 | 0.20 | 0.08 | 0.03 | 0.04 |
| Q9LTR9 | 0.05 | 0.04 | 0.48 | 1.00 | 0.07 | 0.01 | 0.50 | 0.27 | 0.22 | 0.07 | 0.20 | 0.07 |
| Q9LTS3 | 0.17 | 0.04 | 0.38 | 0.20 | 1.00 | 0.33 | 0.04 | 0.31 | 0.03 | 0.14 | 0.03 | 0.62 |
| Q9LV58 | 0.13 | 0.05 | 0.19 | 0.77 | 0.13 | 0.07 | 0.02 | 0.45 | 1.00 | 0.05 | 0.06 | 0.08 |
| Q9LVM5 | 1.00 | 0.13 | 0.44 | 0.44 | 0.12 | 0.20 | 0.08 | 0.50 | 0.49 | 0.84 | 0.03 | 0.12 |
| Q9LW07 | 0.95 | 0.76 | 0.32 | 0.25 | 0.12 | 0.50 | 0.10 | 0.25 | 0.15 | 0.09 | 0.01 | 0.21 |
| Q9LWB5 | 0.08 | 0.02 | 0.85 | 0.20 | 0.03 | 0.02 | 0.01 | 0.22 | 0.10 | 0.01 | 0.31 | 0.03 |
| Q9LX20 | 0.95 | 0.13 | 0.16 | 0.25 | 0.12 | 0.12 | 0.08 | 0.50 | 0.15 | 0.03 | 0.04 | 0.50 |
| Q9LX99 | 0.52 | 0.33 | 0.74 | 0.79 | 0.12 | 0.01 | 0.17 | 0.28 | 1.00 | 0.04 | 0.03 | 0.18 |
| Q9LZ98 | 0.36 | 0.04 | 0.35 | 0.77 | 0.06 | 0.00 | 0.10 | 0.28 | 0.22 | 0.01 | 0.03 | 0.18 |
| Q9M069 | 0.89 | 0.76 | 0.32 | 0.20 | 0.06 | 0.42 | 0.10 | 0.13 | 0.15 | 0.09 | 0.01 | 0.25 |
| Q9M099 | 0.40 | 0.55 | 0.16 | 0.20 | 0.10 | 1.00 | 0.17 | 0.20 | 0.20 | 0.01 | 0.04 | 0.62 |
| Q9M0V3 | 0.07 | 0.04 | 0.30 | 0.77 | 0.03 | 0.01 | 0.33 | 0.17 | 1.00 | 0.04 | 0.05 | 0.04 |
| Q9M1G9 | 0.19 | 1.00 | 0.05 | 0.20 | 0.02 | 0.42 | 0.10 | 0.11 | 0.02 | 0.00 | 0.00 | 0.06 |
| Q9M2Y6 | 0.52 | 0.09 | 0.67 | 0.50 | 0.18 | 0.00 | 1.00 | 0.26 | 0.07 | 0.04 | 0.00 | 0.41 |
| Q9M385 | 0.11 | 0.01 | 0.88 | 0.57 | 0.02 | 0.02 | 0.00 | 0.20 | 0.14 | 0.04 | 0.31 | 0.04 |
| Q9M3D6 | 0.52 | 0.05 | 0.35 | 0.33 | 0.18 | 0.04 | 0.67 | 0.28 | 0.10 | 0.04 | 0.03 | 1.00 |
| Q9M4G5 | 0.09 | 0.18 | 0.85 | 0.50 | 0.05 | 0.18 | 0.05 | 0.18 | 0.18 | 0.05 | 0.12 | 0.11 |
| Q9M4W3 | 0.08 | 0.02 | 1.00 | 0.50 | 0.25 | 0.01 | 0.01 | 0.38 | 0.18 | 0.06 | 0.12 | 0.08 |
| Q9M571 | 0.08 | 0.09 | 0.41 | 1.00 | 0.20 | 0.10 | 0.02 | 0.20 | 0.50 | 0.15 | 0.08 | 0.10 |
| Q9M7T0 | 0.24 | 0.08 | 0.40 | 0.35 | 0.08 | 0.08 | 0.00 | 0.95 | 0.25 | 0.17 | 0.03 | 0.08 |
| Q9M8U1 | 0.33 | 0.03 | 0.27 | 0.38 | 0.15 | 0.08 | 0.08 | 0.18 | 0.49 | 0.02 | 0.02 | 1.00 |
| Q9M8W5 | 0.50 | 0.04 | 0.23 | 0.12 | 0.90 | 0.00 | 0.12 | 0.27 | 0.03 | 0.03 | 0.00 | 0.33 |
| Q9MTI5 | 0.01 | 0.01 | 0.85 | 0.18 | 0.01 | 0.02 | 0.00 | 0.26 | 0.08 | 0.01 | 0.31 | 0.01 |
| Q9MTM6 | 0.52 | 0.05 | 1.00 | 0.25 | 0.18 | 0.00 | 0.12 | 0.26 | 0.07 | 0.03 | 0.00 | 0.15 |
| Q9MTM7 | 0.06 | 0.13 | 0.33 | 0.00 | 0.00 | 0.69 | 0.06 | 0.00 | 0.25 | 0.00 | 0.00 | 0.33 |
| Q9MTM9 | 0.15 | 0.02 | 1.00 | 0.77 | 0.03 | 0.14 | 0.02 | 0.09 | 0.87 | 0.14 | 0.06 | 0.14 |
| Q9MTN0 | 0.08 | 0.09 | 1.00 | 0.20 | 0.04 | 0.10 | 0.01 | 0.42 | 0.10 | 0.09 | 0.08 | 0.50 |
| Q9MTN3 | 0.50 | 0.20 | 0.25 | 0.25 | 0.18 | 0.04 | 0.67 | 0.32 | 0.04 | 0.03 | 0.00 | 0.62 |
| Q9MTN4 | 0.52 | 0.05 | 1.00 | 0.79 | 0.12 | 0.00 | 0.11 | 0.25 | 0.84 | 0.03 | 0.00 | 0.10 |
| Q9MTN9 | 0.05 | 0.04 | 1.00 | 0.77 | 0.17 | 0.17 | 0.03 | 0.50 | 0.22 | 0.04 | 0.21 | 0.04 |

|        |      |      |      |      |      |      |      |      |      |      |      |      |
|--------|------|------|------|------|------|------|------|------|------|------|------|------|
| Q9MTP2 | 0.19 | 0.76 | 1.00 | 0.17 | 0.08 | 0.19 | 0.10 | 0.31 | 0.01 | 0.15 | 0.06 | 0.02 |
| Q9MTP8 | 0.52 | 0.09 | 1.00 | 0.50 | 0.12 | 0.10 | 0.50 | 0.25 | 0.79 | 0.15 | 0.08 | 0.10 |
| Q9MUL5 | 0.01 | 0.00 | 0.85 | 0.02 | 0.01 | 0.00 | 0.00 | 0.09 | 0.02 | 0.01 | 0.12 | 0.01 |
| Q9MUL6 | 0.01 | 0.00 | 0.85 | 0.02 | 0.01 | 0.00 | 0.00 | 0.09 | 0.02 | 0.01 | 0.12 | 0.01 |
| Q9MUL7 | 0.02 | 0.02 | 0.85 | 0.24 | 0.04 | 0.01 | 0.02 | 0.13 | 0.70 | 0.03 | 0.31 | 0.02 |
| Q9MUM6 | 0.01 | 0.00 | 0.85 | 0.02 | 0.01 | 0.00 | 0.00 | 0.09 | 0.02 | 0.01 | 0.12 | 0.01 |
| Q9MUM7 | 0.01 | 0.00 | 0.85 | 0.02 | 0.01 | 0.00 | 0.00 | 0.09 | 0.02 | 0.01 | 0.12 | 0.01 |
| Q9MUN5 | 0.01 | 0.00 | 0.85 | 0.02 | 0.01 | 0.00 | 0.00 | 0.09 | 0.02 | 0.01 | 0.12 | 0.01 |
| Q9MUP3 | 0.01 | 0.00 | 0.85 | 0.02 | 0.01 | 0.00 | 0.00 | 0.09 | 0.02 | 0.01 | 0.12 | 0.01 |
| Q9MUQ5 | 0.01 | 0.00 | 0.85 | 0.02 | 0.01 | 0.00 | 0.00 | 0.09 | 0.02 | 0.01 | 0.12 | 0.01 |
| Q9MUQ8 | 0.01 | 0.00 | 0.85 | 0.02 | 0.01 | 0.00 | 0.00 | 0.09 | 0.02 | 0.01 | 0.12 | 0.01 |
| Q9MUR1 | 0.24 | 0.04 | 0.85 | 0.17 | 0.12 | 0.01 | 0.10 | 0.69 | 0.04 | 0.08 | 0.12 | 0.16 |
| Q9MUR2 | 0.01 | 0.00 | 0.85 | 0.02 | 0.01 | 0.00 | 0.00 | 0.09 | 0.02 | 0.01 | 0.12 | 0.01 |
| Q9MUT3 | 0.08 | 0.02 | 1.00 | 0.20 | 0.04 | 0.00 | 0.01 | 0.42 | 0.10 | 0.04 | 0.12 | 0.04 |
| Q9MV14 | 0.13 | 0.13 | 1.00 | 0.17 | 0.04 | 0.12 | 0.03 | 0.50 | 0.15 | 0.01 | 0.12 | 0.12 |
| Q9S775 | 0.20 | 0.13 | 0.35 | 0.40 | 0.25 | 0.12 | 0.06 | 0.44 | 1.00 | 0.02 | 0.05 | 0.12 |
| Q9S7B2 | 0.18 | 0.08 | 0.33 | 0.67 | 0.29 | 0.50 | 0.13 | 0.50 | 1.00 | 0.05 | 0.06 | 0.33 |
| Q9S7B5 | 0.11 | 0.09 | 1.00 | 0.44 | 0.03 | 0.10 | 0.03 | 0.31 | 0.20 | 0.09 | 0.12 | 0.08 |
| Q9S7E4 | 0.05 | 0.09 | 0.85 | 0.23 | 0.08 | 0.10 | 0.00 | 1.00 | 0.12 | 0.15 | 0.12 | 0.08 |
| Q9S7T7 | 0.04 | 0.04 | 0.13 | 0.33 | 0.02 | 0.00 | 0.00 | 0.17 | 1.00 | 0.00 | 0.00 | 0.01 |
| Q9S7W5 | 0.27 | 0.02 | 1.00 | 0.40 | 0.13 | 0.00 | 0.13 | 0.09 | 0.85 | 0.02 | 0.12 | 0.18 |
| Q9S7Y7 | 0.29 | 1.00 | 0.85 | 0.44 | 0.40 | 1.00 | 0.10 | 0.50 | 0.20 | 0.09 | 0.02 | 0.30 |
| Q9S850 | 0.50 | 0.04 | 0.50 | 0.44 | 0.06 | 0.01 | 0.03 | 0.89 | 0.20 | 1.00 | 0.03 | 0.05 |
| Q9SA23 | 0.50 | 0.20 | 0.25 | 0.26 | 0.18 | 0.04 | 0.67 | 0.32 | 0.49 | 0.03 | 0.00 | 0.62 |
| Q9SA77 | 0.24 | 0.50 | 0.45 | 0.50 | 0.18 | 0.18 | 1.00 | 0.26 | 0.05 | 0.05 | 0.00 | 0.50 |
| Q9SAK4 | 0.05 | 0.09 | 0.88 | 0.67 | 0.09 | 0.10 | 0.00 | 1.00 | 0.33 | 0.17 | 0.06 | 0.06 |
| Q9SBK6 | 0.08 | 0.02 | 0.43 | 1.00 | 0.08 | 0.01 | 0.02 | 0.14 | 1.00 | 0.43 | 0.14 | 0.10 |
| Q9SCB9 | 0.24 | 0.04 | 0.14 | 0.13 | 0.12 | 0.04 | 0.10 | 0.67 | 0.03 | 0.04 | 0.00 | 1.00 |
| Q9SCJ9 | 0.33 | 0.13 | 0.16 | 0.57 | 0.14 | 0.12 | 0.14 | 0.25 | 1.00 | 0.05 | 0.04 | 0.29 |
| Q9SCX9 | 0.18 | 0.18 | 1.00 | 0.40 | 0.20 | 0.18 | 0.02 | 0.31 | 0.45 | 0.15 | 0.12 | 0.11 |
| Q9SD53 | 0.52 | 0.05 | 0.10 | 0.25 | 0.18 | 0.00 | 0.12 | 0.26 | 0.07 | 0.03 | 0.00 | 0.15 |
| Q9SD80 | 0.24 | 0.07 | 0.84 | 0.25 | 0.18 | 0.00 | 0.21 | 1.00 | 0.04 | 0.03 | 0.12 | 0.16 |
| Q9SE20 | 0.03 | 0.01 | 1.00 | 0.17 | 0.17 | 0.01 | 0.00 | 0.31 | 0.02 | 0.08 | 0.12 | 0.02 |
| Q9SE42 | 0.09 | 0.18 | 0.45 | 1.00 | 0.05 | 0.18 | 0.05 | 0.18 | 0.22 | 0.09 | 0.02 | 0.11 |
| Q9SE43 | 0.50 | 0.13 | 0.19 | 0.67 | 0.03 | 0.00 | 0.50 | 0.09 | 1.00 | 0.00 | 0.06 | 0.01 |
| Q9SE50 | 0.29 | 0.33 | 0.85 | 0.50 | 1.00 | 0.38 | 0.20 | 0.33 | 0.84 | 0.84 | 0.02 | 0.62 |
| Q9SE83 | 0.52 | 0.21 | 0.35 | 1.00 | 0.12 | 0.12 | 1.00 | 0.25 | 0.71 | 0.04 | 0.09 | 0.50 |
| Q9SEL5 | 0.52 | 0.17 | 0.17 | 0.67 | 0.90 | 0.01 | 1.00 | 0.32 | 0.49 | 0.04 | 0.00 | 0.17 |
| Q9SF32 | 0.20 | 0.10 | 0.13 | 0.79 | 0.05 | 0.00 | 0.17 | 0.17 | 0.84 | 0.02 | 0.00 | 0.30 |
| Q9SHI1 | 0.11 | 0.09 | 0.88 | 0.38 | 0.03 | 0.00 | 0.09 | 0.22 | 0.10 | 0.04 | 0.33 | 0.04 |
| Q9SHJ5 | 0.24 | 0.20 | 0.41 | 0.40 | 0.50 | 0.10 | 0.12 | 1.00 | 0.50 | 0.15 | 0.08 | 0.33 |
| Q9SJ12 | 0.24 | 0.05 | 0.85 | 0.30 | 0.12 | 0.00 | 0.10 | 1.00 | 0.60 | 0.05 | 0.02 | 0.28 |
| Q9SKK0 | 0.07 | 0.02 | 0.08 | 0.57 | 0.50 | 0.00 | 0.05 | 0.09 | 1.00 | 0.02 | 0.00 | 0.14 |
| Q9SLG2 | 0.10 | 0.02 | 0.67 | 0.25 | 0.79 | 0.01 | 0.04 | 0.50 | 0.18 | 0.03 | 0.05 | 0.08 |
| Q9SLN5 | 0.13 | 0.13 | 0.33 | 0.77 | 0.10 | 0.12 | 0.04 | 0.67 | 0.22 | 0.04 | 0.04 | 0.13 |
| Q9SLX0 | 0.33 | 0.07 | 0.17 | 1.00 | 0.50 | 0.01 | 0.21 | 0.33 | 0.84 | 0.04 | 0.00 | 0.16 |

|        |      |      |      |      |      |      |      |      |      |      |      |      |
|--------|------|------|------|------|------|------|------|------|------|------|------|------|
| Q9SMH4 | 0.01 | 0.01 | 1.00 | 0.14 | 0.01 | 0.02 | 0.00 | 0.50 | 0.50 | 0.01 | 0.21 | 0.01 |
| Q9SMN1 | 0.24 | 0.03 | 0.85 | 0.31 | 0.13 | 0.04 | 0.08 | 1.00 | 0.83 | 0.30 | 0.10 | 0.41 |
| Q9SMZ4 | 0.05 | 0.09 | 0.38 | 1.00 | 0.06 | 0.10 | 0.02 | 0.31 | 0.22 | 0.09 | 0.03 | 0.06 |
| Q9SQI2 | 0.50 | 0.02 | 0.25 | 0.77 | 0.10 | 0.06 | 0.05 | 0.50 | 1.00 | 0.02 | 0.00 | 0.04 |
| Q9SR43 | 0.03 | 0.01 | 1.00 | 0.17 | 0.06 | 0.01 | 0.00 | 0.91 | 0.02 | 0.08 | 0.12 | 0.02 |
| Q9SSX0 | 0.24 | 0.10 | 0.44 | 1.00 | 0.12 | 0.12 | 0.08 | 0.25 | 0.49 | 0.03 | 0.19 | 0.17 |
| Q9ST69 | 0.01 | 0.01 | 1.00 | 0.18 | 0.01 | 0.02 | 0.00 | 0.26 | 0.08 | 0.01 | 0.31 | 0.01 |
| Q9SU40 | 0.95 | 1.00 | 0.31 | 0.44 | 0.12 | 0.42 | 0.08 | 0.73 | 0.20 | 0.08 | 0.03 | 0.41 |
| Q9SUC9 | 0.95 | 0.11 | 0.10 | 0.25 | 0.40 | 0.00 | 0.08 | 0.25 | 0.07 | 0.03 | 0.00 | 0.10 |
| Q9SUI6 | 0.24 | 0.50 | 1.00 | 0.17 | 0.18 | 0.00 | 0.12 | 0.50 | 0.17 | 0.06 | 0.12 | 0.15 |
| Q9SV84 | 1.00 | 0.05 | 0.23 | 0.25 | 0.50 | 0.00 | 0.12 | 0.27 | 0.07 | 0.03 | 0.00 | 0.50 |
| Q9SVG4 | 0.95 | 0.65 | 0.38 | 0.44 | 0.17 | 0.42 | 0.08 | 0.89 | 0.20 | 0.14 | 0.03 | 0.62 |
| Q9SWG0 | 0.08 | 0.09 | 0.34 | 0.19 | 0.07 | 0.10 | 0.00 | 1.00 | 0.09 | 0.67 | 0.03 | 0.14 |
| Q9SWH4 | 0.24 | 0.20 | 0.20 | 0.33 | 0.50 | 0.00 | 1.00 | 0.32 | 0.49 | 0.03 | 0.00 | 0.33 |
| Q9SWI1 | 0.52 | 0.05 | 0.10 | 1.00 | 0.33 | 0.00 | 0.33 | 0.25 | 0.93 | 0.03 | 0.00 | 0.10 |
| Q9SWI6 | 0.01 | 0.01 | 0.85 | 0.20 | 0.01 | 0.00 | 0.00 | 0.20 | 0.04 | 0.01 | 0.21 | 0.01 |
| Q9SWR3 | 0.05 | 0.04 | 0.50 | 1.00 | 0.04 | 0.04 | 0.02 | 0.31 | 0.50 | 0.09 | 0.05 | 0.10 |
| Q9SX77 | 0.24 | 0.03 | 0.44 | 0.24 | 0.12 | 0.00 | 0.08 | 1.00 | 0.84 | 0.24 | 0.00 | 0.10 |
| Q9SXZ2 | 0.50 | 0.02 | 0.09 | 0.77 | 0.79 | 0.00 | 0.05 | 0.09 | 1.00 | 0.02 | 0.00 | 0.22 |
| Q9SYM4 | 0.11 | 1.00 | 0.42 | 1.00 | 0.17 | 0.42 | 0.50 | 0.20 | 0.50 | 0.09 | 0.05 | 1.00 |
| Q9SYT0 | 0.52 | 0.65 | 0.88 | 1.00 | 0.25 | 0.37 | 0.08 | 0.89 | 0.53 | 0.17 | 0.02 | 0.62 |
| Q9SZ30 | 0.08 | 0.25 | 1.00 | 0.77 | 0.04 | 0.25 | 0.02 | 0.50 | 0.22 | 0.09 | 0.12 | 0.08 |
| Q9SZF7 | 0.50 | 0.02 | 0.18 | 1.00 | 0.05 | 0.00 | 0.67 | 0.09 | 0.87 | 0.02 | 0.06 | 0.18 |
| Q9SZW5 | 0.52 | 0.13 | 0.35 | 0.25 | 0.18 | 0.12 | 0.12 | 0.58 | 0.18 | 0.03 | 0.03 | 1.00 |
| Q9T041 | 0.25 | 0.05 | 0.13 | 1.00 | 0.05 | 0.00 | 0.25 | 0.17 | 0.79 | 0.00 | 0.00 | 0.13 |
| Q9T052 | 0.25 | 0.13 | 0.50 | 0.77 | 0.15 | 0.12 | 0.08 | 0.25 | 0.22 | 0.15 | 0.08 | 0.50 |
| Q9T076 | 0.95 | 0.33 | 0.85 | 0.25 | 0.12 | 0.37 | 0.08 | 0.64 | 0.07 | 0.04 | 0.02 | 0.62 |
| Q9T0N8 | 0.17 | 0.55 | 0.38 | 0.20 | 0.40 | 0.69 | 0.06 | 0.31 | 0.03 | 0.14 | 0.03 | 0.33 |
| Q9TIR8 | 0.01 | 0.01 | 0.85 | 0.14 | 0.01 | 0.02 | 0.00 | 0.09 | 0.13 | 0.01 | 0.25 | 0.01 |
| Q9TJQ6 | 0.08 | 0.02 | 0.84 | 0.20 | 0.03 | 0.02 | 0.01 | 0.22 | 0.10 | 0.01 | 0.31 | 0.03 |
| Q9TJQ7 | 0.01 | 0.01 | 0.84 | 0.20 | 0.00 | 0.00 | 0.00 | 0.20 | 0.04 | 0.01 | 0.21 | 0.00 |
| Q9TJQ9 | 0.00 | 0.01 | 0.84 | 0.18 | 0.00 | 0.02 | 0.00 | 0.26 | 0.08 | 0.00 | 0.31 | 0.00 |
| Q9TKU9 | 0.01 | 0.01 | 0.85 | 0.18 | 0.01 | 0.00 | 0.00 | 0.20 | 0.02 | 0.01 | 0.27 | 0.01 |
| Q9TL05 | 0.02 | 0.02 | 0.85 | 0.24 | 0.04 | 0.01 | 0.02 | 0.13 | 0.70 | 0.03 | 0.31 | 0.02 |
| Q9TL10 | 0.13 | 0.13 | 0.85 | 0.24 | 0.04 | 0.14 | 0.03 | 0.18 | 0.43 | 0.02 | 0.21 | 0.12 |
| Q9TL28 | 0.02 | 0.02 | 0.85 | 0.24 | 0.04 | 0.01 | 0.02 | 0.17 | 0.70 | 0.03 | 0.31 | 0.02 |
| Q9XF62 | 0.01 | 0.01 | 0.04 | 0.24 | 0.02 | 0.00 | 0.00 | 0.02 | 0.84 | 0.00 | 0.00 | 0.01 |
| Q9XFA2 | 0.33 | 0.02 | 0.44 | 1.00 | 0.04 | 0.00 | 0.02 | 0.28 | 0.22 | 0.06 | 0.03 | 0.08 |
| Q9XFM6 | 1.00 | 0.13 | 0.25 | 0.26 | 0.79 | 0.00 | 0.50 | 0.27 | 0.49 | 0.13 | 0.00 | 0.25 |
| Q9XFS9 | 0.04 | 0.13 | 1.00 | 0.38 | 0.25 | 0.13 | 0.01 | 0.38 | 0.18 | 0.08 | 0.12 | 0.05 |
| Q9XG54 | 0.08 | 0.04 | 0.44 | 0.77 | 0.20 | 0.04 | 0.02 | 0.31 | 0.22 | 0.50 | 0.19 | 0.10 |
| Q9XG57 | 0.15 | 0.01 | 0.19 | 0.31 | 0.02 | 0.00 | 0.00 | 0.13 | 1.00 | 0.00 | 0.05 | 0.01 |
| Q9XGM2 | 0.13 | 0.13 | 0.47 | 0.38 | 0.04 | 0.14 | 0.05 | 0.18 | 1.00 | 0.02 | 0.02 | 0.12 |
| Q9XGN1 | 0.33 | 0.02 | 0.19 | 1.00 | 0.14 | 0.00 | 0.06 | 0.09 | 0.84 | 0.02 | 0.05 | 0.14 |
| Q9XH48 | 0.33 | 0.07 | 0.27 | 0.67 | 0.11 | 0.01 | 0.21 | 1.00 | 0.18 | 0.02 | 0.02 | 0.16 |
| Q9XI00 | 0.50 | 0.50 | 0.50 | 0.38 | 0.09 | 0.06 | 0.00 | 0.89 | 0.88 | 0.02 | 0.00 | 0.01 |

|        |      |      |      |      |      |      |      |      |      |      |      |      |
|--------|------|------|------|------|------|------|------|------|------|------|------|------|
| Q9XIA7 | 0.24 | 0.07 | 0.14 | 0.25 | 0.18 | 0.00 | 0.21 | 1.00 | 0.04 | 0.03 | 0.00 | 0.16 |
| Q9XIE2 | 1.00 | 0.50 | 0.85 | 0.50 | 0.50 | 0.67 | 0.12 | 0.89 | 0.50 | 0.04 | 0.03 | 0.50 |
| Q9XIR4 | 0.01 | 0.01 | 0.85 | 0.14 | 0.01 | 0.02 | 0.00 | 0.09 | 0.08 | 0.01 | 0.21 | 0.01 |
| Q9XJ27 | 0.24 | 0.03 | 1.00 | 0.71 | 0.12 | 0.02 | 0.08 | 0.25 | 0.08 | 0.04 | 0.31 | 0.10 |
| Q9ZNR6 | 0.33 | 0.09 | 0.38 | 0.77 | 0.03 | 0.10 | 0.05 | 0.17 | 0.49 | 0.09 | 0.00 | 0.06 |
| Q9ZNT9 | 0.07 | 0.02 | 0.27 | 0.26 | 0.06 | 0.06 | 0.05 | 0.18 | 1.00 | 0.02 | 0.06 | 0.05 |
| Q9ZS51 | 0.24 | 0.03 | 0.10 | 0.12 | 0.18 | 0.00 | 0.12 | 0.26 | 0.03 | 1.00 | 0.00 | 0.15 |
| Q9ZS97 | 0.43 | 0.04 | 1.00 | 0.26 | 0.15 | 0.00 | 0.10 | 0.67 | 0.49 | 0.02 | 0.33 | 0.29 |
| Q9ZST0 | 0.24 | 0.10 | 0.88 | 0.57 | 0.12 | 0.02 | 0.08 | 0.40 | 0.50 | 0.06 | 0.31 | 0.10 |
| Q9ZSY2 | 0.33 | 0.09 | 0.10 | 1.00 | 1.00 | 0.00 | 1.00 | 0.25 | 0.33 | 0.03 | 0.00 | 0.10 |
| Q9ZSZ8 | 0.29 | 0.21 | 0.08 | 0.26 | 0.20 | 0.04 | 0.07 | 0.09 | 1.00 | 0.04 | 0.00 | 0.07 |
| Q9ZT50 | 0.15 | 0.20 | 0.41 | 1.00 | 0.20 | 0.04 | 0.33 | 0.44 | 1.00 | 0.20 | 0.05 | 0.20 |
| Q9ZT63 | 0.50 | 0.04 | 0.27 | 0.24 | 0.33 | 0.04 | 0.12 | 0.48 | 0.18 | 0.04 | 0.02 | 1.00 |
| Q9ZUX4 | 0.08 | 0.05 | 0.30 | 0.30 | 0.09 | 0.04 | 0.04 | 1.00 | 0.60 | 0.30 | 0.10 | 0.62 |
| Q9ZVD3 | 0.27 | 0.01 | 0.19 | 0.36 | 0.18 | 0.00 | 0.00 | 0.09 | 0.85 | 0.00 | 0.06 | 0.01 |
| Q9ZWR8 | 0.02 | 0.02 | 0.41 | 1.00 | 0.07 | 0.01 | 0.02 | 0.27 | 0.22 | 0.20 | 0.05 | 0.07 |
